# Supplementary material
Source: Royal Society of Chemistry journal article supplement (doi:10.1039/d6cc01416j)
Supplement: d6cc01416j1.pdf [file d6cc01416j1.pdf]

# Supporting Information

## Electrochemically enabled synthesis of oxathiazinane via a radical cyclization cascade

Zhuo-Qi Lin,<sup>a</sup> Zhi-Long Lei,<sup>\*a</sup> Xiu-Jin Meng,<sup>a</sup> Wen-Bing Wang,<sup>\*b</sup> Hai-Tao Tang<sup>a</sup> and Ying-Ming Pan<sup>\*a</sup>

<sup>a</sup>Key Laboratory for Chemistry and Molecular Engineering of Medicinal Resources (Ministry of Education of China), Guangxi Key Laboratory of Chemistry and Molecular Engineering of Medicinal Resources, University Engineering Research Center for Chemistry of Characteristic Medicinal Resources (Guangxi), Guangxi Normal University, Guilin 541004, People's Republic of China.

<sup>b</sup>Guangxi Lingshui Forestry Chemical Co., Ltd, China.

E-mail: panym@mailbox.gxnu.edu.cn; wenbing0534@163.com; 2575833209@qq.com.

## Table of Contents

|                                                           |     |
|-----------------------------------------------------------|-----|
| 1. General methods .....                                  | S3  |
| 2. Supplementary experiments .....                        | S3  |
| 3. Synthesis of substrates.....                           | S4  |
| 4. General procedure for the preparation of products..... | S4  |
| 5. Structural analysis of substrate 3a .....              | S6  |
| 6. Control experiments .....                              | S9  |
| 7. The application of the product .....                   | S13 |
| 8. Cyclic voltammetry studies.....                        | S14 |
| 9. Characterization data for the products .....           | S15 |
| 10. NMR data .....                                        | S21 |
| 11. References.....                                       | S56 |

## 1. General methods

Unless otherwise noted, all reagents and solvents were obtained commercially and used without further purification. Column chromatography on silica gel (300-400 mesh) was carried out using technical grade 60-90 °C petroleum ether and analytical grade EtOAc (without further purification). <sup>1</sup>H and <sup>13</sup>C and <sup>19</sup>F spectra were recorded on a 400 MHz or 600MHz spectrometer. Chemical shifts were reported in ppm. <sup>1</sup>H and <sup>19</sup>F NMR spectra were referenced to CDCl<sub>3</sub> (7.26 ppm) or DMSO (2.5 ppm) or MeOD (4.87 ppm), and <sup>13</sup>C-NMR spectra were referenced to CDCl<sub>3</sub> (77.0 ppm) or DMSO (39.5 ppm) or MeOD (49.0 ppm). Peak multiplicities were designated by the following abbreviations: s, singlet; d, doublet; t, triplet; m, multiplet; brs, broad singlet and J, coupling constant in Hz. The HRMS spectrum was measured by micromass QTOF<sub>2</sub> Quadrupole/Time of Flight Tandem mass spectrometer with electron spray ionization. Potentiostat was purchased from Shanghai Xinrui Company and the model is DJS-292B.

## 2. Supplementary experiments

Table S1 Screening of Reaction Conditions<sup>a</sup>

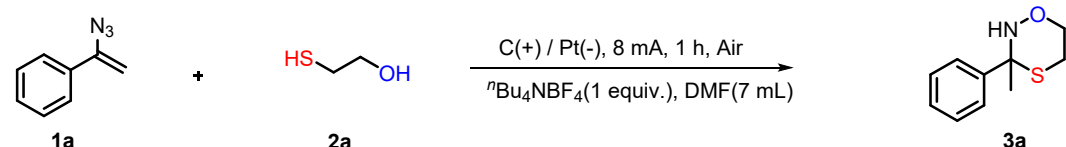

Reaction scheme: 1a + 2a  $\xrightarrow[\text{tBu}_4\text{NBF}_4(1 \text{ equiv.}), \text{DMF}(7 \text{ mL})]{\text{C}(+)/\text{Pt}(-), 8 \text{ mA}, 1 \text{ h}, \text{Air}}$  3a

| Entry | Electrode   | Current (mA) | additive           | Solvent | time | Yield (%) <sup>[b]</sup> |
|-------|-------------|--------------|--------------------|---------|------|--------------------------|
| 1     | C(+) Pt(-)  | 5 mA         | TBABF <sub>4</sub> | MeCN    | 3 h  | 51%                      |
| 2     | C(+) C(-)   | 5 mA         | TBABF <sub>4</sub> | MeCN    | 3 h  | Trace                    |
| 3     | Pt(+) Pt(-) | 5 mA         | TBABF <sub>4</sub> | MeCN    | 3 h  | Trace                    |
| 4     | C(+) Pt(-)  | 7 mA         | TBABF <sub>4</sub> | MeCN    | 3 h  | 45%                      |
| 5     | C(+) Pt(-)  | 3 mA         | TBABF <sub>4</sub> | MeCN    | 3 h  | 17%                      |
| 6     | C(+) Pt(-)  | 5 mA         | TBABF <sub>4</sub> | MeCN    | 2 h  | 36%                      |
| 7     | C(+) Pt(-)  | 5 mA         | TBABF <sub>4</sub> | MeCN    | 4 h  | 44%                      |
| 8     | C(+) Pt(-)  | 5 mA         | TBABF <sub>4</sub> | DCM     | 3 h  | nd                       |
| 9     | C(+) Pt(-)  | 5 mA         | TBABF <sub>4</sub> | THF     | 3 h  | Trace                    |
| 10    | C(+) C(-)   | 5 mA         | TBABF <sub>4</sub> | DMSO    | 3 h  | 65%                      |
| 11    | C(+) C(-)   | 5 mA         | TBABF <sub>4</sub> | MeOH    | 2 h  | 31%                      |
| 12    | C(+) C(-)   | 5 mA         | TBABF <sub>4</sub> | DMF     | 3 h  | 77%                      |

|    |               |      |                                      |      |     |       |
|----|---------------|------|--------------------------------------|------|-----|-------|
| 13 | C(+) Pt(-)    | 8 mA | TBABF <sub>4</sub>                   | DMF  | 1 h | 87%   |
| 14 | C(+) Pt(-)    | 8 mA | TBAI                                 | DMF  | 1 h | 70%   |
| 15 | C(+) Pt(-)    | 8 mA | TBAP                                 | DMF  | 1 h | 56%   |
| 16 | C(+) Pt(-)    | 8 mA | TBAHB                                | MeOH | 1 h | nd    |
| 17 | C(+) Pt(-)    | 8 mA | n-Bu <sub>4</sub> PF <sub>6</sub>    | DMF  | 1 h | 51%   |
| 18 | C(+) Pt(-)    | 8 mA | n-Bu <sub>4</sub> ClO <sub>4</sub> N | DMF  | 1 h | 41%   |
| 19 | RVC(+) RVC(-) | 8 mA | TBABF <sub>4</sub>                   | DMF  | 1 h | Trace |
| 20 | RVC(+) Pt(-)  | 8 mA | TBABF <sub>4</sub>                   | DMF  | 1 h | 64%   |

[<sup>a</sup>]Reaction conditions: **1a** (0.4 mmol), **2a** (1.4 mmol), DMF as solvent (7 mL), electrolysis at a constant current of 8 mA for 1 h in an undivided cell. [<sup>b</sup>] Isolated yield.

### 3. Synthesis of substrates

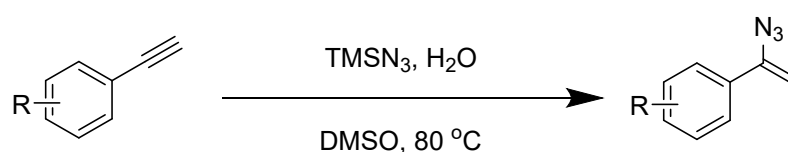

To a solution of TMSN<sub>3</sub> and AgCO<sub>3</sub> in DMSO (20 mL), alkyne and H<sub>2</sub>O was added in a 50 mL round-bottomed flask. Then the mixture was stirred at 80 °C for 90-120 minutes.<sup>[1]</sup> After completion (evidenced by TLC), the reaction is cooled to room temperature and the solution is transferred to a beaker containing dichloromethane and extracted with water. The resulting mixture was extraction by dichloromethane. The organic layer was combined, washed with brine, and dried over MgSO<sub>4</sub>. The organic phase after drying is concentrated under reduced pressure and the residue is purified by column chromatography on silica gel, with petroleum ether as eluent to provide **1a-1t**.

### 4. General procedure for the preparation of products

Electrochemical synthesis of compounds **3a-3t**

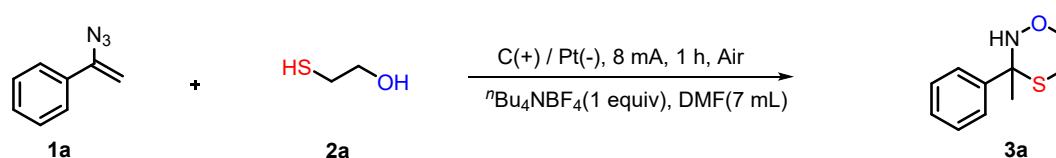

A 10 ml three-necked round-bottomed flask was charged sequentially with **1a** (0.4 mmol, 1.0 eq), **2a** (1.4 mmol, 3.5 eq) and TBABF<sub>4</sub> (0.4 mmol). The electrolytic cell was equipped with a graphite rod anode (Φ6 mm) and a platinum plate cathode (1 cm × 1 cm). The three-neck flask was then filled with DMF (7 mL). Electrolysis was carried out at room temperature at a constant current of 8 mA for the appropriate time. At the end of the reaction, the reaction mixture was washed with water and extracted with dichloromethane (3 × 10 mL). The organic layers were combined, dried with Na<sub>2</sub>SO<sub>4</sub> and concentrated. Flash column chromatography on silica gel gave the pure product .

## Other attempts with other types of double nucleophilic reagents

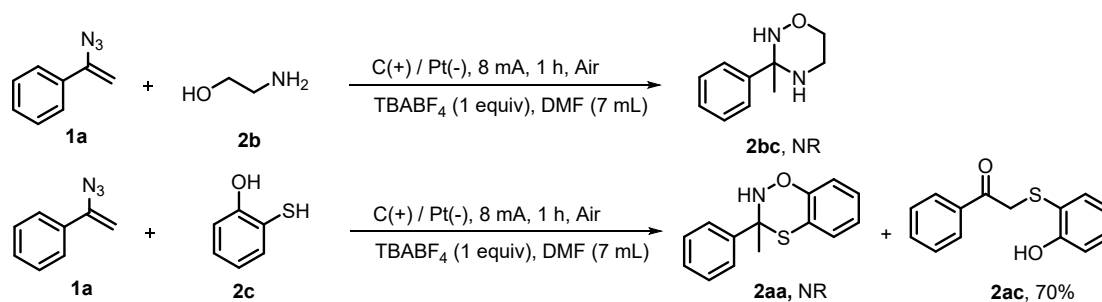

**2-((2-hydroxyphenyl)thio)-1-phenylethan-1-one (2ac).** The title compound (68.3 mg) was isolated by flash chromatography (petroleum ether : ethyl acetate = 10 : 1 to 5 : 1) in 70% yield.

$^1\text{H NMR}$  (500 MHz,  $\text{CDCl}_3$ )  $\delta$  7.96-7.95 (m, 3H), 7.64-7.61 (m, 1H),  $\delta$  7.55-7.53 (m, 1H),  $\delta$  7.51-7.48 (m, 2H),  $\delta$  7.33-7.29 (m, 1H),  $\delta$  7.03-7.02 (m, 1H),  $\delta$  6.89-6.86 (m, 1H), 4.26 (s, 2H).  $^{13}\text{C NMR}$  (126 MHz,  $\text{CDCl}_3$ )  $\delta$  195.2, 158.2, 136.9, 135.1, 134.0, 132.0, 128.9, 128.6, 120.8, 118.3, 116.1, 44.7. **HRMS (m/z) (ESI):** calcd for  $\text{C}_{14}\text{H}_{13}\text{O}_2\text{S}^+$   $[\text{M}+\text{H}]^+$  245.0631, found 245.0633.

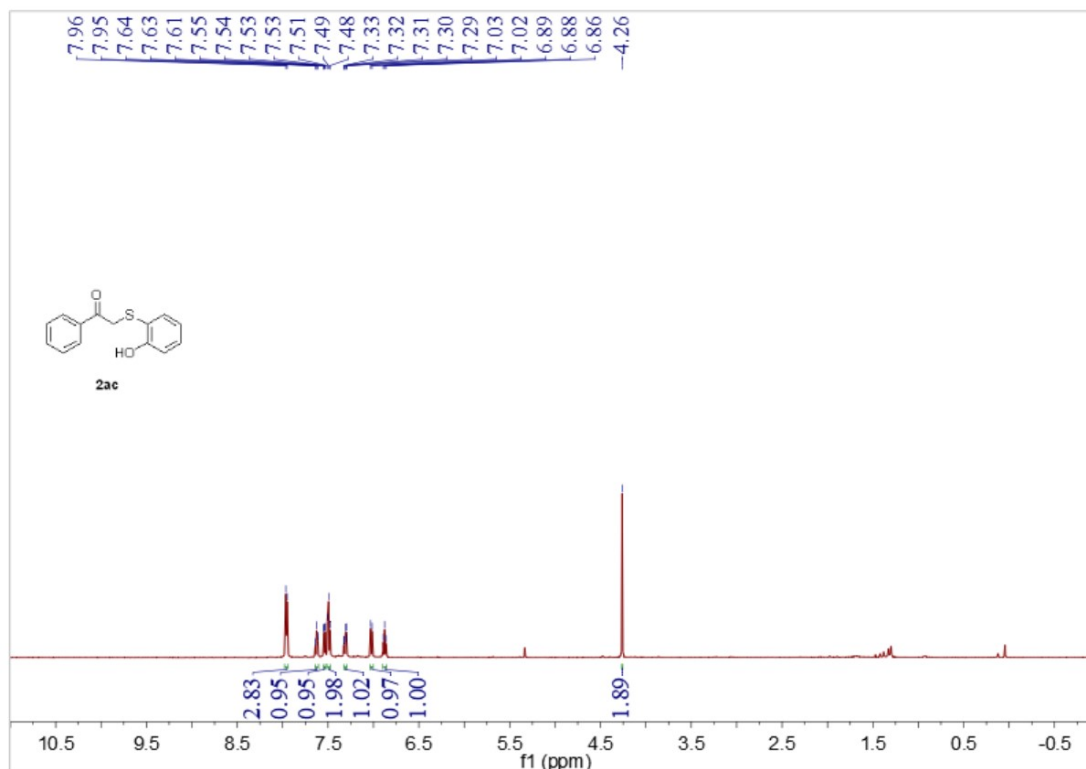

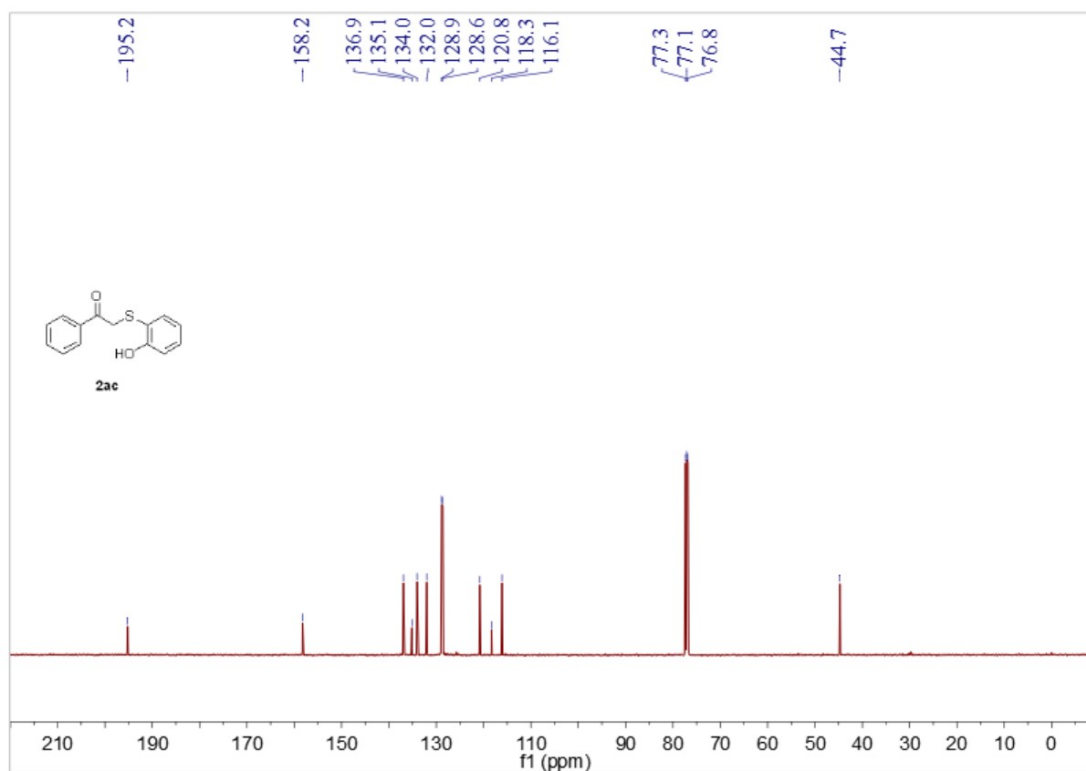

## 5. Structural analysis of substrate 3a

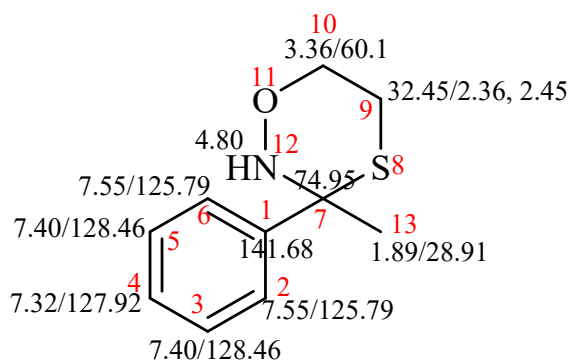

From the <sup>1</sup>H-<sup>1</sup>H COSY spectrum, correlations were observed among the protons at  $\delta$  7.55, 7.40, and 7.32, indicating that H-2/H-3/H-4/H-5/H-6 are connected. Furthermore, the proton at  $\delta$  4.80 showed correlations with the proton at  $\delta$  3.36, and the proton at  $\delta$  3.36 showed correlations with the protons at  $\delta$  2.36 and 2.45, establishing the HN-O-CH<sub>2</sub>-CH<sub>2</sub>-S fragment.

The HMBC spectrum revealed that the methyl protons at  $\delta$  1.89 exhibited correlations with carbons at  $\delta$  32.33, 74.95, and 141.69, demonstrating that the methyl group at position 13 is attached to the quaternary carbon at position 7. The proton at  $\delta$  7.55 showed a correlation with the quaternary carbon at  $\delta$  74.95, confirming that position 1

of the benzene ring is connected to this quaternary carbon. Additionally, the proton at  $\delta$  7.55, along with the protons at  $\delta$  2.36 and 2.45, exhibited correlations with the quaternary carbon at  $\delta$  74.95, indicating that the sulfur at position 8 is bonded to the quaternary carbon at position 7. The correlations of the proton at  $\delta$  4.80 with carbons at  $\delta$  32.47 and 60.08, the proton at  $\delta$  3.35 with the carbon at  $\delta$  32.47, and the protons at  $\delta$  2.36 and 2.45 with the carbon at  $\delta$  60.15 further supported the existence of the HN-O-CH<sub>2</sub>-CH<sub>2</sub>-S fragment.

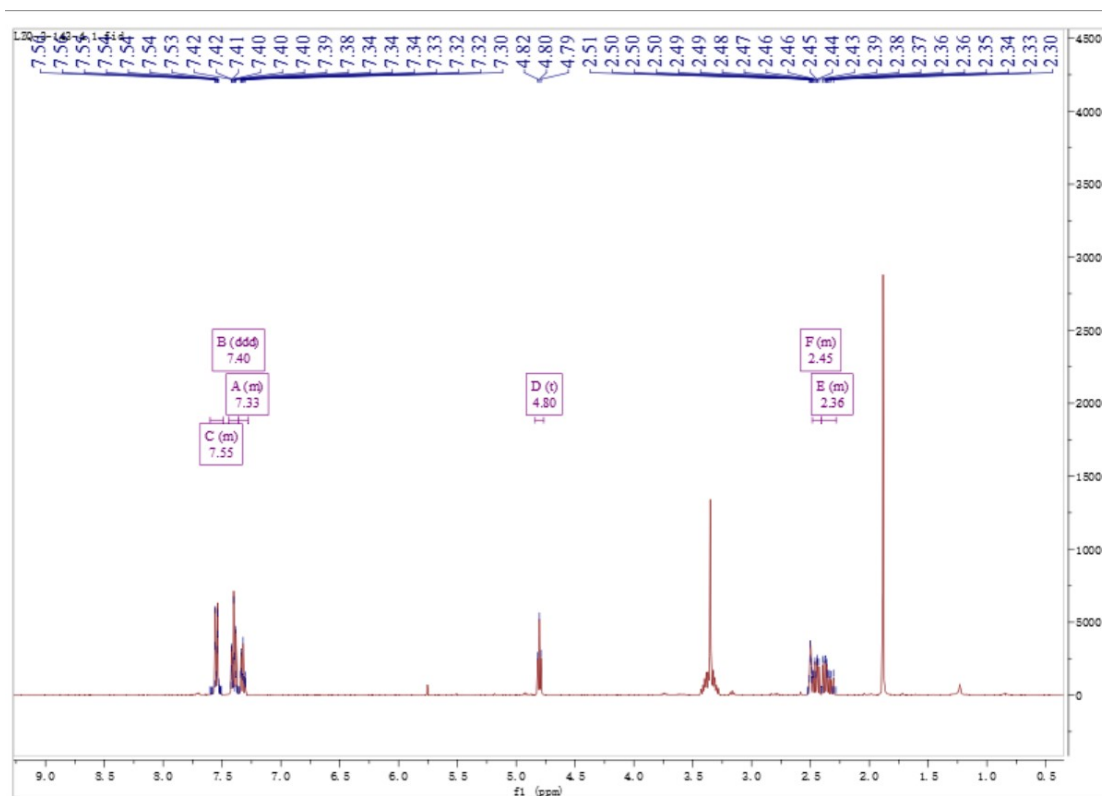

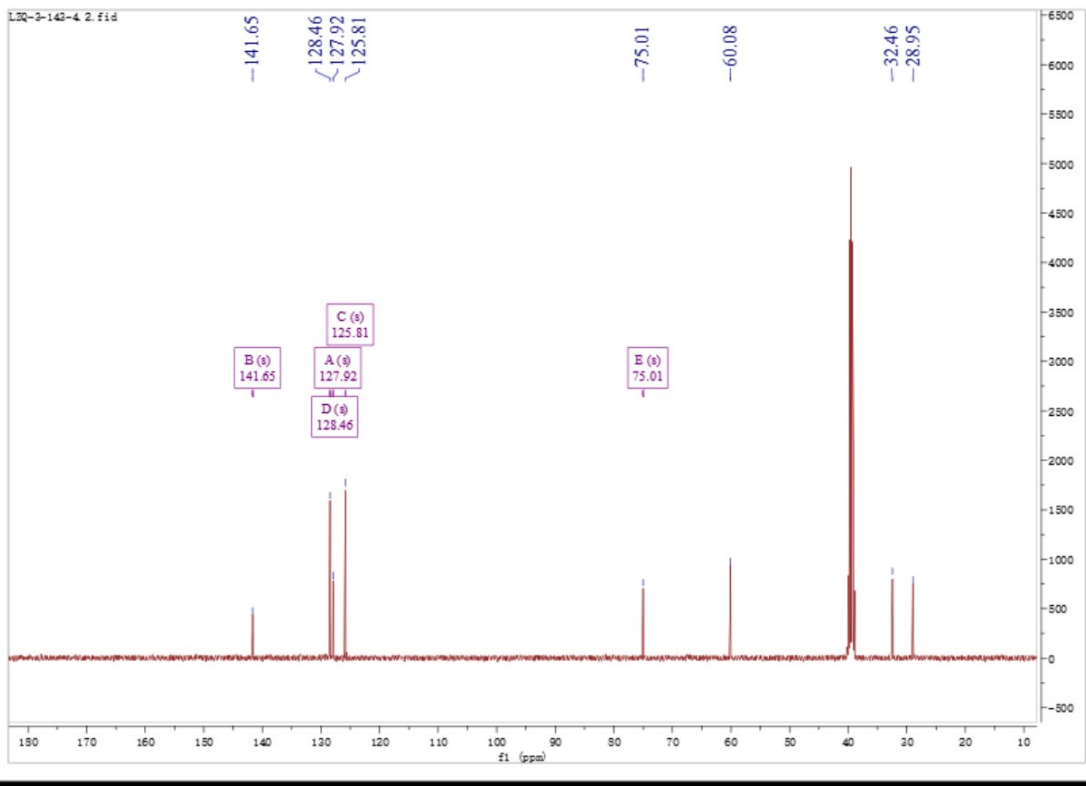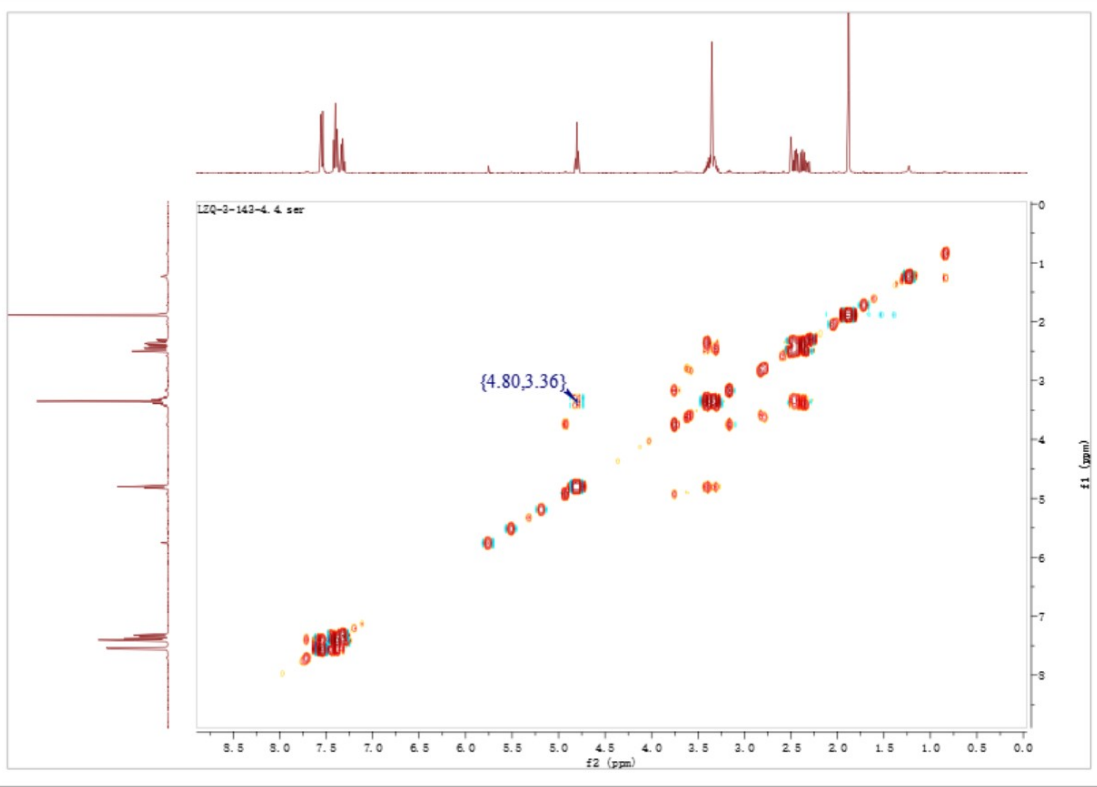

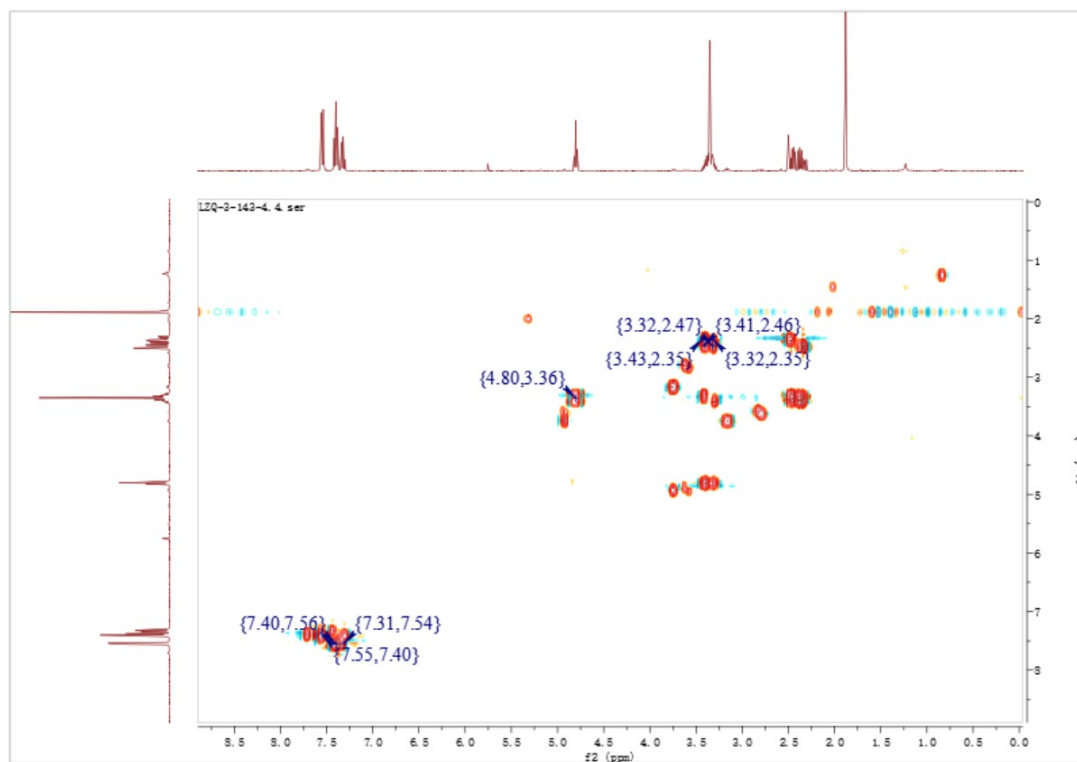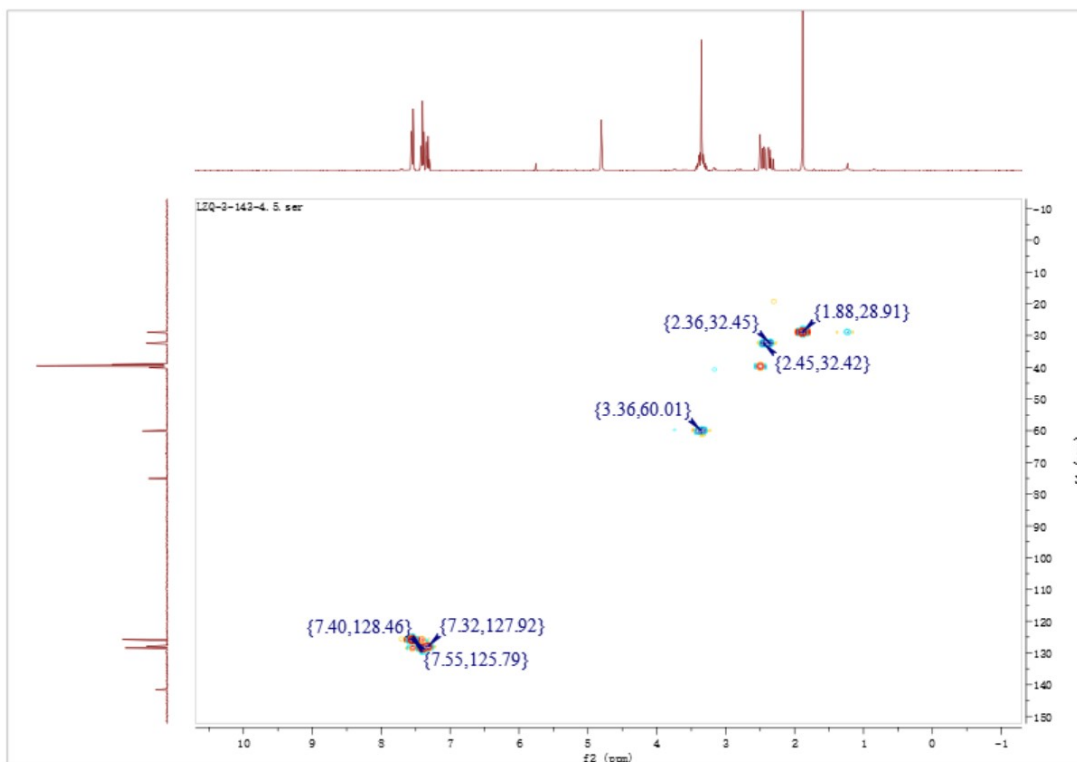

## 6. Control experiments

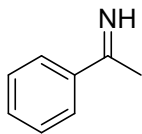

(M+H<sup>+</sup>) 120.0808  
detected in HRMS

**Figure S1:** Compound 4a: HRMS (m/z) [ESI]: calculated for C<sub>8</sub>H<sub>10</sub>N<sup>+</sup> [M+H]<sup>+</sup> : 120.0808, found 120.0808 .

|             |                 |                        |         |                 |                     |
|-------------|-----------------|------------------------|---------|-----------------|---------------------|
| Sample Name | LZQ-198         | Position               | P1-A1   | Instrument Name | Instrument 1        |
| User Name   |                 | Inj Vol                | 0.5     | InjPosition     |                     |
| Sample Type | Sample          | IRM Calibration Status | Success | Data Filename   | LZQ-198.d           |
| ACQ Method  | #CYM-VJ-11MIN.m | Comment                |         | Acquired Time   | 05/03/2026 09:52:36 |

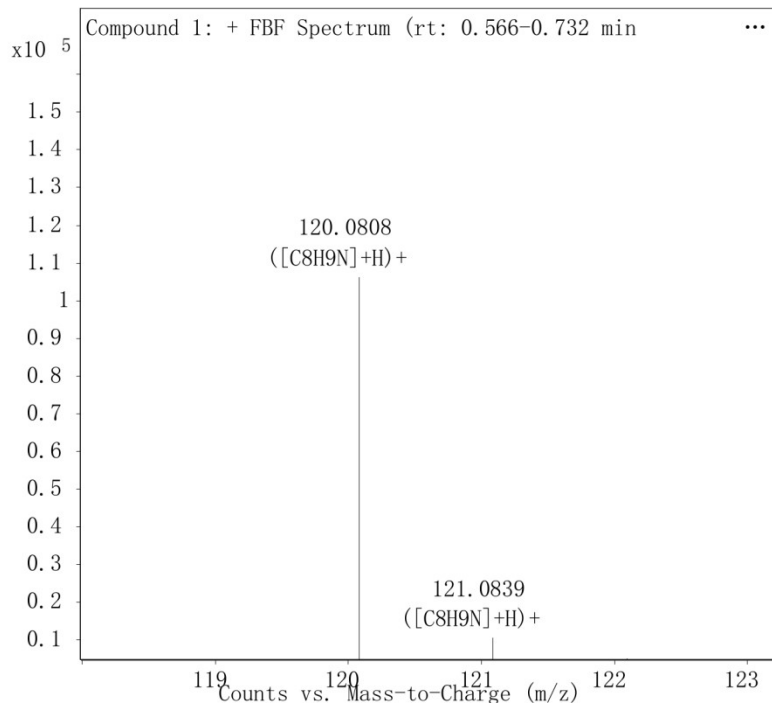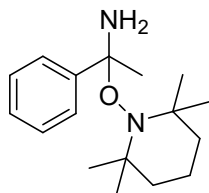

**Figure S2:** Compound 4c :HRMS (m/z) [ESI]: calculated for C<sub>17</sub>H<sub>28</sub>N<sub>2</sub>O<sup>+</sup> [M+K]<sup>+</sup> : 315.1834, found 315.1858 .

| Sample Name   | LZQ-198   | Position    | P1-A1           | Instrument Name | Instrument 1 | User Name              |                |
|---------------|-----------|-------------|-----------------|-----------------|--------------|------------------------|----------------|
| Inj Vol       | 0.5       | InjPosition |                 | SampleType      | Sample       | IRM Calibration Status | Success        |
| Data Filename | LZQ-198.d | ACQ Method  | #CYM-YJ-11MIN.m | Comment         |              | Acquired Time          | 3/5/2026 9:52: |

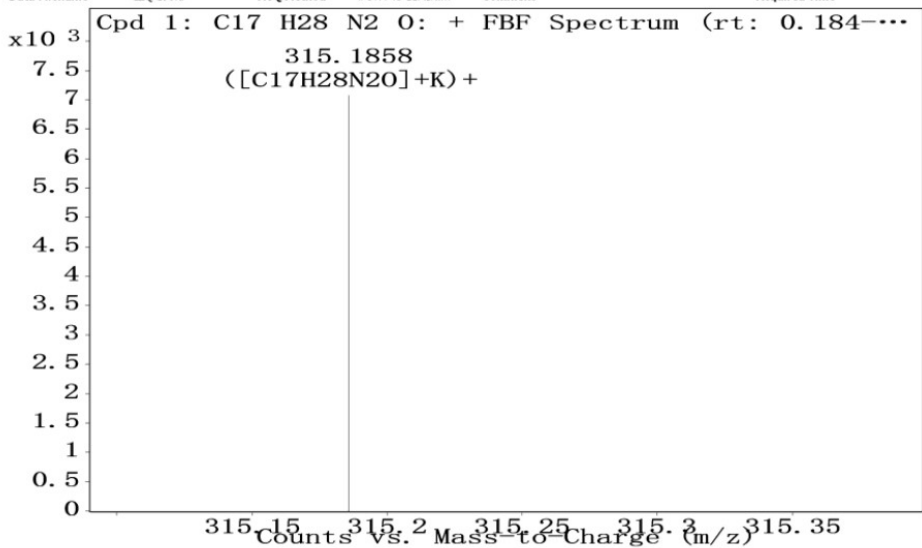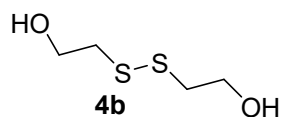

**2,2'-disulfanediybis(ethan-1-ol) (4b).** The title compound (170 mg) was isolated by flash chromatography (petroleum ether : ethyl acetate = 3 : 1 to 1 : 1) in 80% yield.

$^1\text{H NMR}$  (400 MHz,  $\text{CDCl}_3$ )  $\delta$  3.88 (t,  $J = 5.9$  Hz, 4H), 2.87 (3,  $J = 5.9$  Hz, 4H).  $^{13}\text{C NMR}$  (101 MHz,  $\text{CDCl}_3$ ) 60.4, 41.3 **HRMS (m/z) (ESI):** calcd for  $\text{C}_4\text{H}_{11}\text{O}_2\text{S}_2^+$   $[\text{M}+\text{H}]^+$  155.0195, found 155.0198.

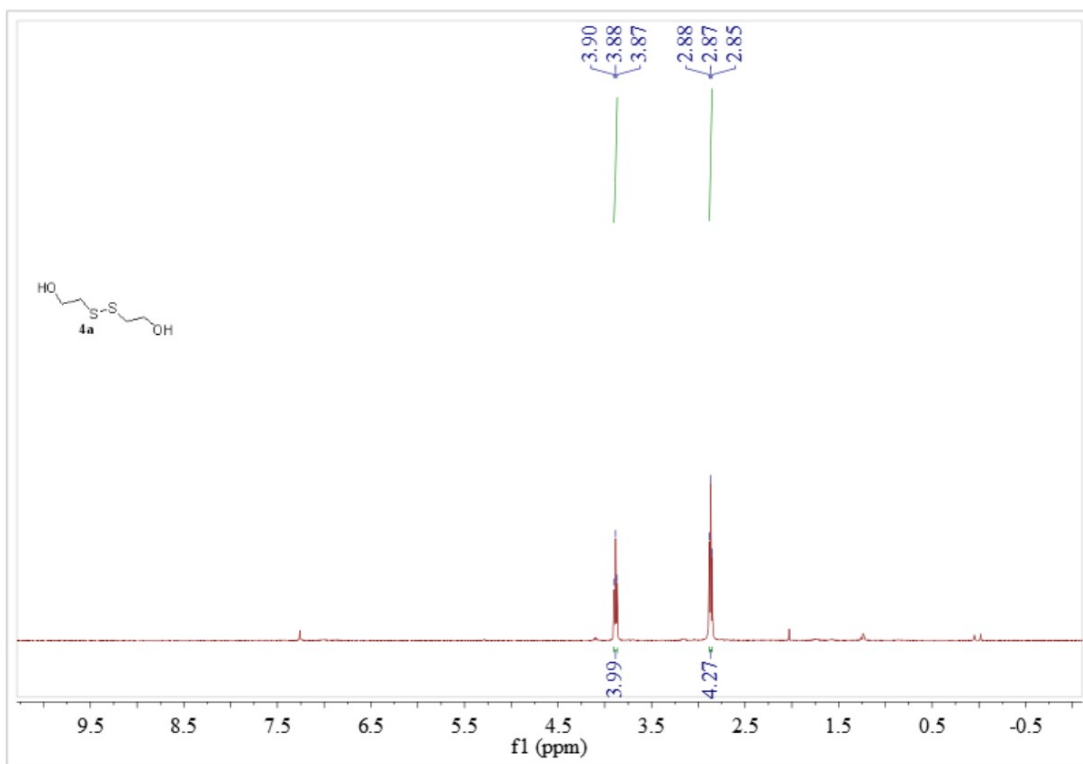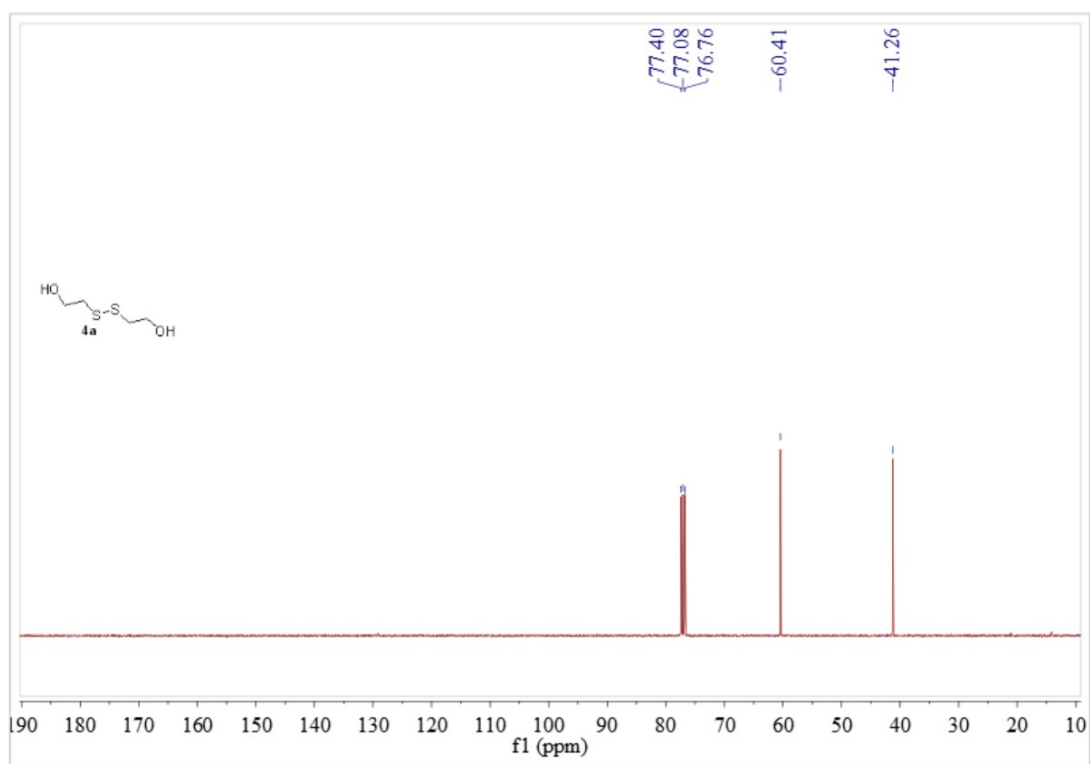

## 7. The application of the product

### Preparation of scale-up reactions

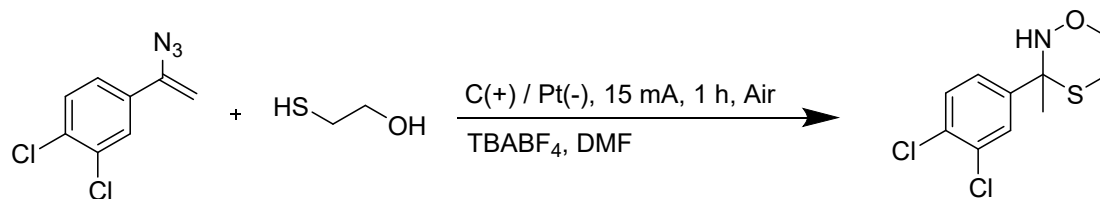

A 25 ml round-bottomed flask was filled sequentially with **1o** (6 mmol, 1.0 eq), **2a** (10.5 mmol, 1.75 eq). The cell was equipped with a graphite rod anode ( $\Phi 6$  mm) and a Platinum plate cathode (15 mm  $\times$  15 mm  $\times$  0.3 mm). DMF (20 ml) were added to a round-bottomed flask. Electrolysis was carried out at room temperature at a constant current of 15 mA for 1 h. At the end of the reaction, the reaction mixture was washed with water and extracted with dichloromethane (3  $\times$  30 mL). The organic layers were combined, dried with Na<sub>2</sub>SO<sub>4</sub> and concentrated. Flash column chromatography on silica gel gave the pure product **4o** in 70% (1.1 g) yield (petroleum ether: ethyl acetate = 7 : 1 to 3 : 1).

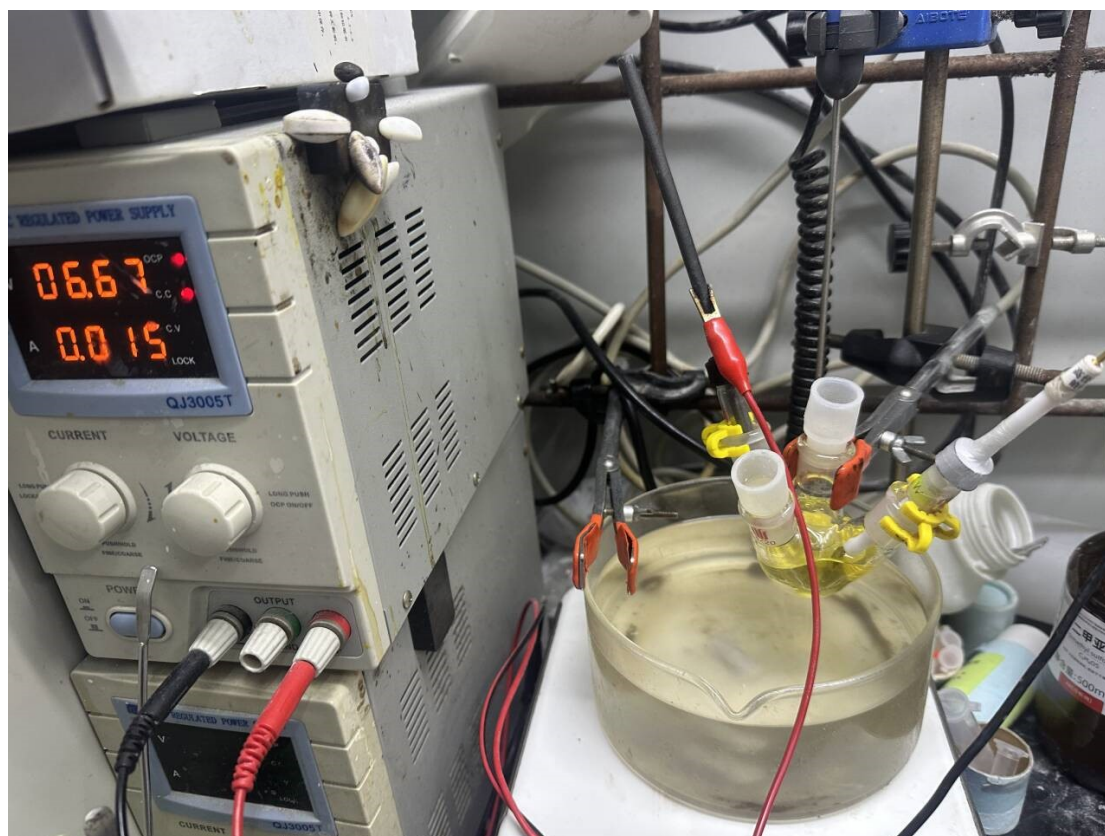

Figure S3 Electrolysis setup

### Derivatisation of products

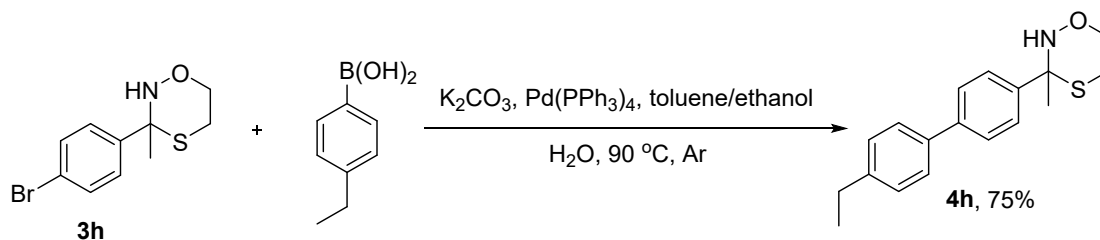

**3h** (0.2 mmol, 1.0 eq), 4-ethylphenylboronic acid (0.24 mmol, 1.2 eq),  $K_2CO_3$  (0.4 mmol, 2.0 eq), tetrakis (triphenylphosphine) palladium (0.00002 mmol, 0.0001 eq). Add the above drugs into the branch mouth bottle, repeatedly pumping up three times, after adding toluene (7 mL), ethanol (2 mL),  $H_2O$  (1 mL) in turn, the reaction at  $90\text{ }^\circ\text{C}$  5 h and extracted with ethyl acetate ( $3 \times 10\text{ mL}$ ). The organic layers were combined, dried with  $Na_2SO_4$  and concentrated. Flash column chromatography on silica gel gave the pure product **4h** (petroleum ether: ethyl acetate = 3 : 1 to 1 : 1).

## 8. Cyclic voltammetry studies

The cyclic voltammograms were recorded in an electrolyte solution of  $LiClO_4$  (0.1 M) in  $CH_3CN$  using a glassy carbon disk working electrode (diameter, 3 mm), a Pt wire auxiliary electrode and a Ag/AgCl reference electrode. The scan rate was 100 mV/s.

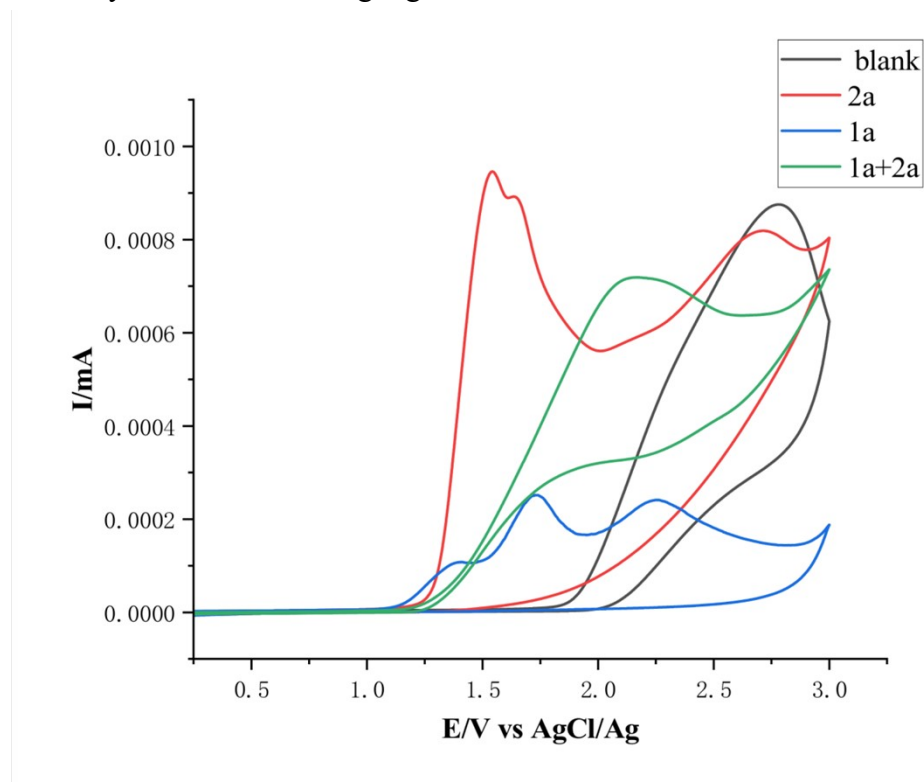

Figure S4 Cyclic voltammograms in  $CH_3CN$  + 0.1 M  $LiClO_4$ . Black line: blank; red line: **2a** (0.3 mmol);

blue line: **1a** (0.1 mmol); green line: **2a** (0.3 mmol) + **1a** (0.1 mmol).

## 9. Characterization data for the products

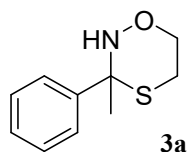

**3-methyl-3-phenyl-1,4,2-oxathiazinane (3a).** The title compound (63 mg) was isolated by flash chromatography (petroleum ether : ethyl acetate = 10 : 1 to 5 : 1) in 80% yield.

**<sup>1</sup>H NMR (500 MHz, CDCl<sub>3</sub>)** δ 7.57 (m, 2H), 7.36 (m, 2H), 7.28 (m, 1H), 3.58-3.49 (m, 2H), 2.56 (m, 2H), 1.94 (s, 3H). **<sup>13</sup>C NMR (126 MHz, CDCl<sub>3</sub>)** δ 141.8, 128.5, 128.0, 126.1, 75.2, 61.2, 33.4, 29.5. **HRMS (m/z) (ESI):** calcd for C<sub>10</sub>H<sub>14</sub>NOS<sup>+</sup> [M+H]<sup>+</sup> 196.0791, found 196.0792.

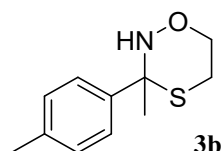

**3-methyl-3-(p-tolyl)-1,4,2-oxathiazinane (3b).** The title compound (70.5 mg) was isolated by flash chromatography (petroleum ether : ethyl acetate = 10 : 1 to 5 : 1) in 85% yield.

**<sup>1</sup>H NMR (500 MHz, CDCl<sub>3</sub>)** δ 7.45 (m, 2H), 7.17-7.15 (m, 2H), 3.60-3.49 (m, 2H), 2.61-2.52 (m, 2H), 2.34 (s, 3H), 1.92 (s, 3H). **<sup>13</sup>C NMR (126 MHz, CDCl<sub>3</sub>)** δ 139.0, 137.9, 129.3, 126.1, 75.3, 61.3, 33.6, 29.6, 21.1. **HRMS (m/z) (ESI):** calcd for C<sub>11</sub>H<sub>16</sub>NOS<sup>+</sup> [M+H]<sup>+</sup> 210.0948, found 210.0948

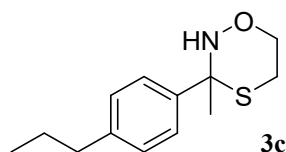

**3-methyl-3-(4-propylphenyl)-1,4,2-oxathiazinane (3c).** The title compound (74 mg) was isolated by flash chromatography (petroleum ether : ethyl acetate = 10 : 1 to 5 : 1) in 78% yield.

**<sup>1</sup>H NMR (400 MHz, CDCl<sub>3</sub>)** δ 7.47-7.45(m, 2H), 7.17-7.15 (m, 2H), 3.57-3.50 (m, 2H), 2.59-2.55 (m, 4H), 1.93 (s, 3H), 1.66-1.61 (m, 2H), 0.95-0.92 (m, 3H). **<sup>13</sup>C NMR (101 MHz, CDCl<sub>3</sub>)** δ 142.7, 139.2, 128.7, 126.0, 75.3, 61.3, 37.7, 33.6, 29.6, 24.5, 14.0. **HRMS (m/z) (ESI):** calcd for C<sub>13</sub>H<sub>20</sub>NOS<sup>+</sup> [M+H]<sup>+</sup> 238.1261, found 238.1266.

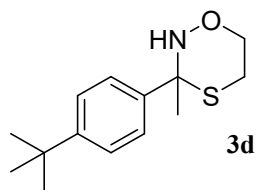

**3-(4-(tert-butyl)phenyl)-3-methyl-1,4,2-oxathiazinane (3d).** The title compound (70.3 mg) was isolated by flash chromatography (petroleum ether : ethyl acetate = 10 : 1 to 5 : 1) in 70% yield.

**<sup>1</sup>H NMR (400 MHz, CDCl<sub>3</sub>)** δ 7.49-7.46 (m, 2H), 7.37-7.35(m, 2H), 3.62-3.50 (m, 2H), 2.59-2.56 (m, 2H), 1.93 (s, 3H), 1.31 (s, 9H). **<sup>13</sup>C NMR (101 MHz, CDCl<sub>3</sub>)** δ 151.1, 138.8, 125.8, 125.5, 75.2, 61.4, 34.6, 33.6, 31.4, 29.6. **HRMS (m/z) (ESI):** calcd for C<sub>14</sub>H<sub>22</sub>NOS<sup>+</sup> [M+H]<sup>+</sup> 252.1417, found 252.1416.

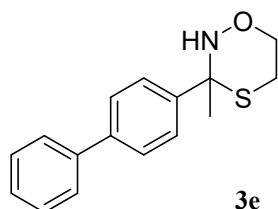

**3-([1,1'-biphenyl]-4-yl)-3-methyl-1,4,2-oxathiazinane (3e).** The title compound (83.4 mg) was isolated by flash chromatography (petroleum ether : ethyl acetate = 10 : 1 to 5 : 1) in 77% yield.

**<sup>1</sup>H NMR (500 MHz, CDCl<sub>3</sub>)** δ 7.65-7.57 (m, 6H), 7.44 (m, 2H), 7.36 (m, 1H), 3.62-3.54 (m, 2H), 2.67-2.56 (m, 2H), 1.98 (s, 3H). **<sup>13</sup>C NMR (126 MHz, CDCl<sub>3</sub>)** δ 140.9, 140.3, 129.0, 127.7, 127.2, 126.7, 33.6, 29.6. **HRMS (m/z) (ESI):** calcd for C<sub>16</sub>H<sub>17</sub>NOSNa<sup>+</sup> [M+Na]<sup>+</sup> 294.0941, found 294.0945

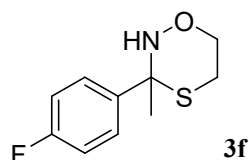

**3-(4-fluorophenyl)-3-methyl-1,4,2-oxathiazinane (3f).** The title compound (68 mg) was isolated by flash chromatography (petroleum ether : ethyl acetate = 10 : 1 to 5 : 1) in 80% yield.

**<sup>1</sup>H NMR (400 MHz, CDCl<sub>3</sub>)** δ 7.57-7.53 (m, 2H), 7.05-7.01(m, 2H), 3.59-3.54 (m, 2H), 2.57 – 2.52 (m, 2H), 1.92 (s, 3H). **<sup>13</sup>C NMR (101 MHz, CDCl<sub>3</sub>)** δ 163.5, 161.0,

137.8, 128.1, 115.5, 115.3, 74.8, 61.3, 33.5, 29.8.  $^{19}\text{F}$  NMR (376 MHz,  $\text{CDCl}_3$ )  $\delta$  -114.24 (s, 1F). HRMS (m/z) (ESI): calcd for  $\text{C}_{10}\text{H}_{13}\text{FNOS}^+$   $[\text{M}+\text{H}]^+$  214.0701, found 214.0702.

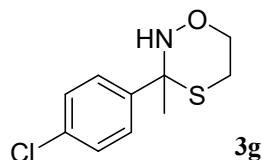

**3-(4-chlorophenyl)-3-methyl-1,4,2-oxathiazinane (3g).** The title compound (75.1 mg) was isolated by flash chromatography (petroleum ether : ethyl acetate = 10 : 1 to 5 : 1) in 82% yield.

$^1\text{H}$  NMR (500 MHz,  $\text{CDCl}_3$ )  $\delta$  7.52-7.50 (m, 2H), 7.33-7.26 (m, 2H), 3.59-3.53 (m, 2H), 2.57-2.50 (m, 2H), 1.90 (s, 3H).  $^{13}\text{C}$  NMR (126 MHz,  $\text{CDCl}_3$ )  $\delta$  140.6, 133.9, 128.7, 127.7, 74.7, 61.2, 33.4, 29.6. HRMS (m/z) (ESI): calcd for  $\text{C}_{10}\text{H}_{13}\text{ClNOS}^+$   $[\text{M}+\text{H}]^+$  230.0401, found 230.0401.

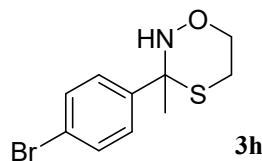

**3-(4-bromophenyl)-3-methyl-1,4,2-oxathiazinane (3h).** The title compound (92.8 mg) was isolated by flash chromatography (petroleum ether : ethyl acetate = 10 : 1 to 5 : 1) in 85% yield.

$^1\text{H}$  NMR (400 MHz,  $\text{CDCl}_3$ )  $\delta$  7.46 (mz, 4H), 3.61-3.49 (m, 2H), 2.52 (m, 7.2 Hz, 2H), 1.89 (s, 3H).  $^{13}\text{C}$  NMR (101 MHz,  $\text{CDCl}_3$ )  $\delta$  141.1, 131.6, 128.0, 122.0, 74.7, 61.1, 33.3, 29.5. HRMS (m/z) (ESI): calcd for  $\text{C}_{10}\text{H}_{13}\text{BrNOS}^+$   $[\text{M}+\text{H}]^+$  273.9896, found 273.9895.

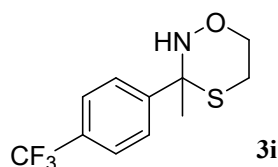

**3-methyl-3-(4-(trifluoromethyl)phenyl)-1,4,2-oxathiazinane (3i).** The title compound (85.2 mg) was isolated by flash chromatography (petroleum ether : ethyl acetate = 10 : 1 to 5 : 1) in 81% yield.

**<sup>1</sup>H NMR (400 MHz, CDCl<sub>3</sub>)** δ 7.72-7.70 (m, 2H), 7.62-7.60 (m, 2H), 3.64-3.53 (m, 2H), 2.59-2.47 (m, 2H), 1.94 (s, 3H). **<sup>13</sup>C NMR (101 MHz, CDCl<sub>3</sub>)** δ 146.0, 130.4, 130.1, 126.8, 125.6,, 74.7, 61.2, 33.4, 29.6. **<sup>19</sup>F NMR (376 MHz, CDCl<sub>3</sub>)** δ -62.63 (s, 3F). **HRMS (m/z) (ESI):** calcd for C<sub>11</sub>H<sub>13</sub>F<sub>3</sub>NOS<sup>+</sup> [M+H]<sup>+</sup> 264.0665, found 264.0663.

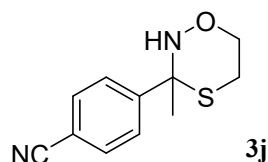

**4-(3-methyl-1,4,2-oxathiazinan-3-yl)benzonitrile (3j).** The title compound (46.7 mg) was isolated by flash chromatography (petroleum ether : ethyl acetate = 10 : 1 to 5 : 1) in 53% yield.

**<sup>1</sup>H NMR (400 MHz, CDCl<sub>3</sub>)** δ 7.72-7.69 (m, 2H), 7.64 (m, 2H), 3.59-3.54 (m, 2H), 2.57-2.43 (m, 2H), 1.92 (s, 3H). **<sup>13</sup>C NMR (101 MHz, CDCl<sub>3</sub>)** δ 147.3, 132.4, 127.2, 111.9, 61.1, 33.2, 29.4. **HRMS (m/z) (ESI):** calcd for C<sub>11</sub>H<sub>13</sub>N<sub>2</sub>OS<sup>+</sup> [M+H]<sup>+</sup> 221.0744, found 221.0743.

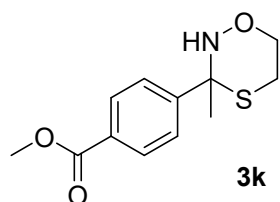

**methyl 4-(3-methyl-1,4,2-oxathiazinan-3-yl)benzoate (3k).** The title compound (80 mg) was isolated by flash chromatography (petroleum ether : ethyl acetate = 10 : 1 to 5 : 1) in 79% yield.

**<sup>1</sup>H NMR (400 MHz, CDCl<sub>3</sub>)** δ 8.02 (d, 2H), 7.65 (d, 2H), 3.92 (s, 3H), 3.60-3.48 (m, 2H), 2.56-2.50 (m, 2H), 1.94 (s, 3H). **<sup>13</sup>C NMR (101 MHz, CDCl<sub>3</sub>)** δ 166.7, 147.0, 129.9, 126.37 (s), 74.8, 61.2, 52.4, 33.5, 29.4. **HRMS (m/z) (ESI):** calcd for C<sub>12</sub>H<sub>16</sub>NO<sub>3</sub>S<sup>+</sup> [M+H]<sup>+</sup> 254.0846, found 254.0844.

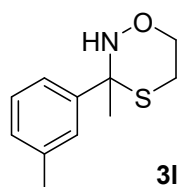

**3-methyl-3-(m-tolyl)-1,4,2-oxathiazinane (3l).** The title compound (66.1 mg) was isolated by flash chromatography (petroleum ether : ethyl acetate = 10 : 1 to 5 : 1) in 79% yield.

**<sup>1</sup>H NMR (400 MHz, CDCl<sub>3</sub>)** δ 7.38-7.36 (m, 2H), 7.23 (m, 1H), 7.10-7.08(m, 1H), 3.61-3.49

(m, 2H), 2.59-2.55 (m, 4.0 Hz, 2H), 2.37 (s, 3H), 1.93 (s, 3H).  $^{13}\text{C}$  NMR (101 MHz,  $\text{CDCl}_3$ )  $\delta$  141.9, 138.3, 128.8, 128.5, 126.8, 123.3, 75.3, 61.3, 33.6, 29.6, 21.7. HRMS (m/z) (ESI): calcd for  $\text{C}_{11}\text{H}_{15}\text{NOS}^+$   $[\text{M}+\text{H}]^+$  210.0947, found 210.0948.

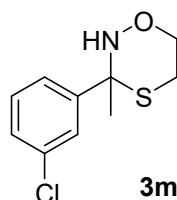

**3-(3-chlorophenyl)-3-methyl-1,4,2-oxathiazinane (3m).** The title compound (77.9 mg) was isolated by flash chromatography (petroleum ether : ethyl acetate = 10 : 1 to 5 : 1) in 85% yield.

$^1\text{H}$  NMR (400 MHz,  $\text{CDCl}_3$ )  $\delta$  7.53 (m, 1H), 7.43-7.40 (m, 1H), 7.26-7.19 (m, 2H), 3.58-3.47 (m, 2H), 2.56-2.44 (m, 2H), 1.86 (s, 3H).  $^{13}\text{C}$  NMR (101 MHz,  $\text{CDCl}_3$ )  $\delta$  144.2, 134.6, 129.9, 128.2, 126.6, 124.5, 74.6, 61.3, 33.5, 29.6. HRMS (m/z) (ESI): calcd for  $\text{C}_{10}\text{H}_{13}\text{ClNOS}^+$   $[\text{M}+\text{H}]^+$  230.0401, found 230.0400.

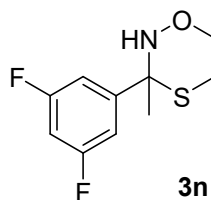

**3-(3,5-difluorophenyl)-3-methyl-1,4,2-oxathiazinane (3n).** The title compound (80 mg) was isolated by flash chromatography (petroleum ether : ethyl acetate = 10 : 1 to 5 : 1) in 86% yield.

$^1\text{H}$  NMR (400 MHz,  $\text{CDCl}_3$ )  $\delta$  7.13 (m, 2H), 6.73 (m, 1H), 3.66-3.55 (m, 2H), 2.63-2.49 (m, 2H), 1.89 (s, 3H).  $^{13}\text{C}$  NMR (101 MHz,  $\text{CDCl}_3$ )  $\delta$  164.3, 161.8, 146.4, 109.89-109.42 (m), 103.5, 74.2, 61.2, 33.4, 29.5.  $^{19}\text{F}$  NMR (376 MHz,  $\text{CDCl}_3$ )  $\delta$  -109.44 (s, 2F). HRMS (m/z) (ESI): calcd for  $\text{C}_{10}\text{H}_{12}\text{F}_2\text{NOS}^+$   $[\text{M}+\text{H}]^+$  232.0603, found 232.0601.

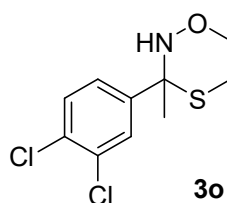

**3-(3,4-dichlorophenyl)-3-methyl-1,4,2-oxathiazinane (3o).** The title compound (78.9 mg) was isolated by flash chromatography (petroleum ether : ethyl acetate = 10 : 1 to 5 : 1) in 75% yield.

**<sup>1</sup>H NMR (400 MHz, CDCl<sub>3</sub>)** δ 7.69-7.64 (m, 1H), 7.41 (m, 2H), 3.60-3.56 (m, 2H), 2.57-2.48 (m, 2H), 1.88 (s, 3H). **<sup>13</sup>C NMR (101 MHz, CDCl<sub>3</sub>)** δ 142.4, 132.7, 132.1, 130.5, 128.4, 125.8, 74.1, 61.2, 33.3, 29.6. **HRMS (m/z) (ESI):** calcd for C<sub>10</sub>H<sub>12</sub>Cl<sub>2</sub>NOS<sup>+</sup> [M+H]<sup>+</sup> 264.0012, found 264.0011.

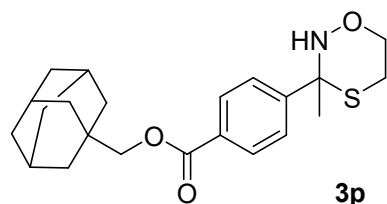

**adamantan-1-ylmethyl 4-(3-methyl-1,4,2-oxathiazinan-3-yl)benzoate (3p).** The title compound (116.1 mg) was isolated by flash chromatography (petroleum ether : ethyl acetate = 10 : 1 to 5 : 1) in 75% yield.

**<sup>1</sup>H NMR (400 MHz, CDCl<sub>3</sub>)** δ 8.04-8.02 (m, 2H), 7.67-7.65 (m, 2H), 3.92 (s, 2H), 3.59-3.53 (m, 2H), 2.60-2.48 (m, 2H), 2.04-2.02 (m, 3H), 1.94 (s, 3H), 1.77-1.67 (m, 7H), 1.66-1.62 (m, 5H). **<sup>13</sup>C NMR (101 MHz, CDCl<sub>3</sub>)** δ 166.2, 146.8, 130.3, 129.9, 126.4, 74.9, 74.8, 61.3, 39.6, 37.1, 33.7, 33.5, 29.5, 28.2. **HRMS (m/z) (ESI):** calcd for C<sub>22</sub>H<sub>30</sub>NO<sub>3</sub>S<sup>+</sup> [M+H]<sup>+</sup> 388.1993, found 388.1997.

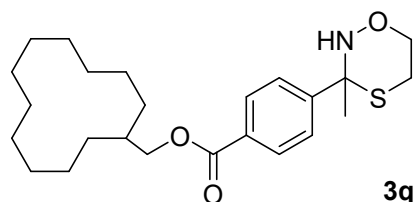

**Cyclododecylmethyl 4-(3-methyl-1,4,2-oxathiazinan-3-yl)benzoate (3q).** The title compound (117.3 mg) was isolated by flash chromatography (petroleum ether : ethyl acetate = 10 : 1 to 5 : 1) in 70% yield.

**<sup>1</sup>H NMR (400 MHz, CDCl<sub>3</sub>)** δ 8.02-8.00 (m, 2H), 7.65-7.63(m, 2H), 3.62-3.49 (m, 2H), 2.60-2.47 (m, 2H), 1.94 (s, 3H), 1.81 (m, 1H), 1.66 (m, 1H), 1.51-1.31 (m, 20H). **<sup>13</sup>C NMR (101 MHz, CDCl<sub>3</sub>)** δ 165.8, 146.7, 130.7, 129.8, 126.3, 74.9, 73.3, 61.2, 33.5, 29.5, 29.3, 24.3, 24.1, 23.5, 24.3, 21.0. **HRMS (m/z) (ESI):** calcd for C<sub>24</sub>H<sub>37</sub>NO<sub>3</sub>SNa<sup>+</sup> [M+H]<sup>+</sup> 420.2387, found 442.2380.

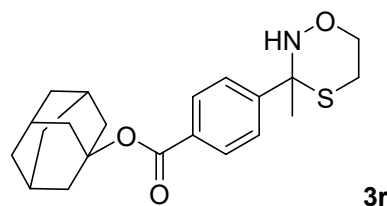

**adamantan-1-yl 4-(3-methyl-1,4,2-oxathiazinan-3-yl)benzoate (3r).** The title compound (116.2 mg) was isolated by flash chromatography (petroleum ether : ethyl acetate = 10 : 1 to 5 : 1) in 78% yield.

**<sup>1</sup>H NMR (400 MHz, CDCl<sub>3</sub>)** δ 7.97-7.94 (m, 2H), 7.63-7.60 (m, 2H), 3.59-3.48 (m, 2H), 2.59-2.46 (m, 2H), 2.24-2.22 (m, 9H), 1.93 (s, 3H), 1.74-1.67 (m, 6H). **<sup>13</sup>C NMR (101 MHz, CDCl<sub>3</sub>)** δ 165.0, 146.3, 131.8, 129.7, 126.1, 81.5, 74.9, 61.2, 41.5, 36.3, 33.5, 31.0, 29.5. **HRMS (m/z) (ESI):** calcd for C<sub>21</sub>H<sub>28</sub>NO<sub>3</sub>S<sup>+</sup> [M+H]<sup>+</sup> 374.1785, found 374.1778.

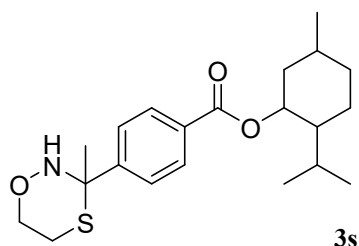

**2-isopropyl-5-methylcyclohexyl 4-(3-methyl-1,4,2-oxathiazinan-3-yl)benzoate (3s).** The title compound (108 mg) was isolated by flash chromatography (petroleum ether : ethyl acetate = 10 : 1 to 5 : 1) in 72% yield.

**<sup>1</sup>H NMR (400 MHz, CDCl<sub>3</sub>)** δ 8.01 (m, 2H), 7.64 (m, 2H), 4.93 (m, 1H), 3.65-3.50 (m, 2H), 2.61-2.45 (m, 2H), 1.93 (s, 3H), 1.73 (m, 2H), 1.60-1.51 (m, 2H), 1.25 (m, 1H), 0.92 (m, 8H), 0.79 (m, 3H). **<sup>13</sup>C NMR (101 MHz, CDCl<sub>3</sub>)** δ 165.7, 146.7, 130.5, 129.9, 126.3, 75.2, 61.3, 47.4, 41.1, 34.4, 33.5, 31.5, 29.5, 26.6, 23.7, 22.16, 20.9, 16.6. **HRMS (m/z) (ESI):** calcd for C<sub>21</sub>H<sub>32</sub>NO<sub>3</sub>S<sup>+</sup> [M+H]<sup>+</sup> 378.2098, found 378.2094.

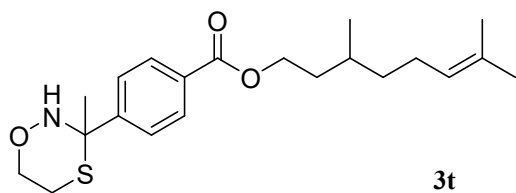

**3,7-dimethyloct-6-en-1-yl 4-(3-methyl-1,4,2-oxathiazinan-3-yl)benzoate (3t).** The title compound (107.1 mg) was isolated by flash chromatography (petroleum ether : ethyl acetate = 10 : 1 to 5 : 1) in 71% yield.

**<sup>1</sup>H NMR (500 MHz, CDCl<sub>3</sub>)** δ 8.00 (m, 2H), 7.65 (m, 2H), 5.38-5.34 (m, 1H), 4.35-4.28 (m, 2H), 3.54 (m, 2H), 2.61-2.48 (m, 2H), 2.42 (m, 2H), 2.39-2.36 (m, 1H), 2.24 (m, 2H), 2.13-2.07 (m, 2H), 1.94 (s, 3H), 1.84-1.68 (m, 1H), 1.27 (s, 3H), 1.25 (m, 1H), 1.17 (m, 1H), 0.83 (s, 3H). **<sup>13</sup>C NMR (126 MHz, CDCl<sub>3</sub>)** δ 166.1, 146.8, 144.3, 130.1, 129.9, 126.3, 119.1, 74.9, 63.2, 61.2, 45.9, 40.8, 38.2, 36.2, 33.5, 31.8, 31.5, 29.4, 26.4, 21.3. **HRMS (m/z) (ESI):** calcd for C<sub>21</sub>H<sub>32</sub>NO<sub>3</sub>S<sup>+</sup> [M+H]<sup>+</sup> 378.2098, found 378.2094.

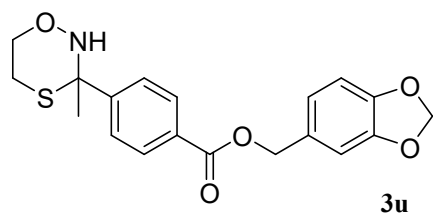

**benzo[d][1,3]dioxol-5-ylmethyl 4-(3-methyl-1,4,2-oxathiazinan-3-yl)benzoate (3u).** The title compound (118 mg) was isolated by flash chromatography (petroleum ether : ethyl acetate = 10 : 1 to 5 : 1) in 79% yield.

**<sup>1</sup>H NMR (400 MHz, CDCl<sub>3</sub>)** δ 8.05-8.00 (m, 2H), 7.66-7.61 (m, 2H), 6.95-6.90 (m, 2H), 6.81 (d, J = 7.8 Hz, 1H), 5.97 (s, 2H), 5.25 (s, 2H), 3.59 – 3.46 (m, 2H), 2.58 – 2.44 (m, 2H), 1.93 (s, 3H). **<sup>13</sup>C NMR (101 MHz, CDCl<sub>3</sub>)** δ 165.9, 147.8, 147.0, 129.9, 129.7, 126.29 (s), 122.4, 109.1, 108.3, 101.3, 74.7, 66.9, 61.1, 33.2, 29.3. **HRMS (m/z) (ESI):** calcd for C<sub>19</sub>H<sub>20</sub>NO<sub>5</sub>S<sup>+</sup> [M+H]<sup>+</sup> 374.1057, found 374.1053.

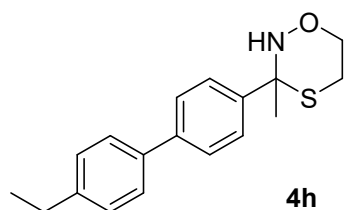

**3-(4'-ethyl-[1,1'-biphenyl]-4-yl)-3-methyl-1,4,2-oxathiazinane (4h).** The title compound (102 mg) was isolated by flash chromatography (petroleum ether : ethyl acetate = 10 : 1 to 5 : 1) in 85% yield.

**<sup>1</sup>H NMR (400 MHz, CDCl<sub>3</sub>)** δ 7.66-7.52 (m, 6H), 7.30 (m, 2H), 3.66-3.53 (m, 2H), 2.72 (qm, 2H), 2.66-2.54 (m, 2H), 1.98 (s, 3H), 1.30 (m, 3H). **<sup>13</sup>C NMR (101 MHz, CDCl<sub>3</sub>)** δ 143.9, 140.8, 140.6, 137.6, 128.5, 127.0, 126.6, 75.2, 61.3, 33.5, 29.6, 28.6, 15.7. **HRMS (m/z) (ESI):** calcd for C<sub>18</sub>H<sub>22</sub>NOS<sup>+</sup> [M+H]<sup>+</sup> 300.1412, found 300.1413.

## 10. NMR Data

**3-methyl-3-phenyl-1,4,2-oxathiazinane (3a).**

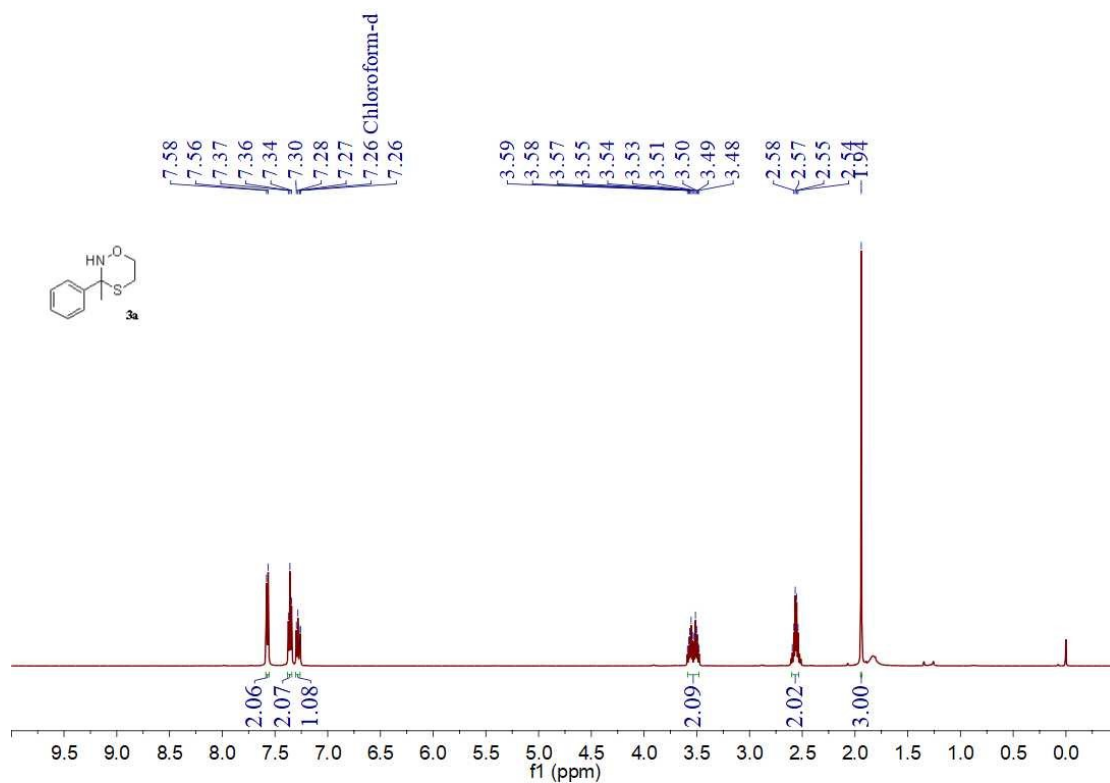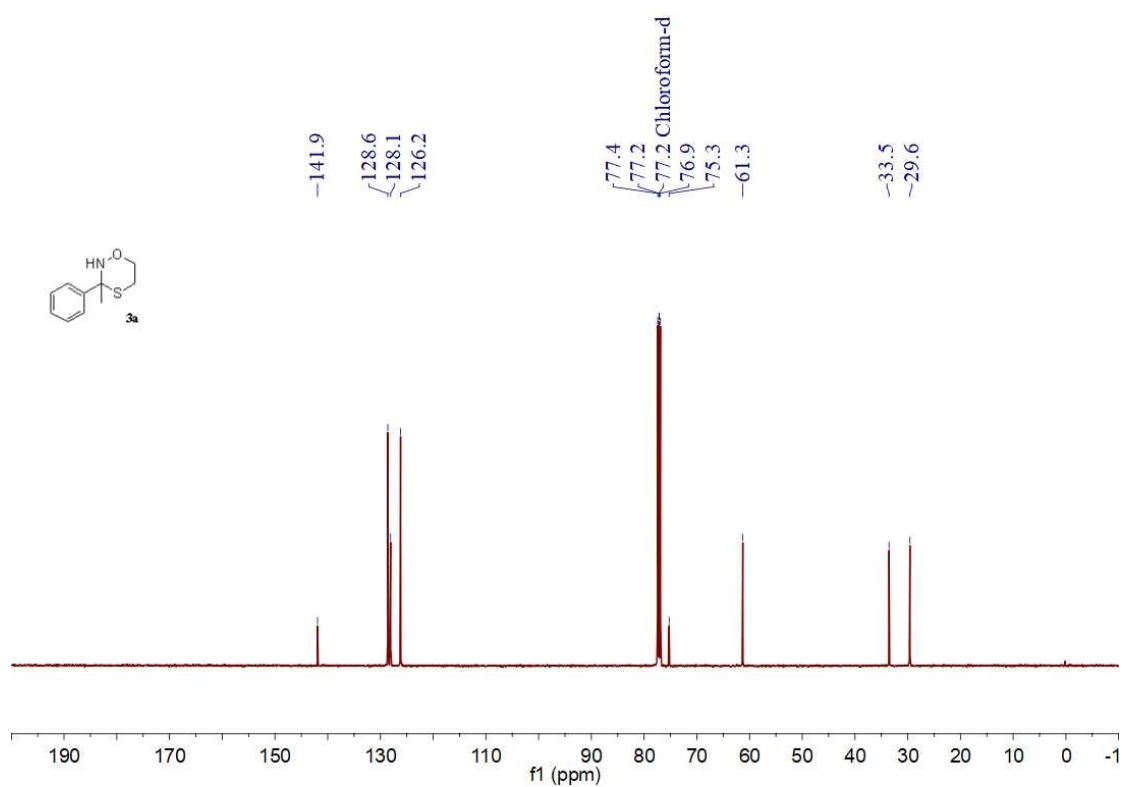

| Sample Name   | Position    | PI-AI       | Instrument Name | Instrument 1 | User Name              |
|---------------|-------------|-------------|-----------------|--------------|------------------------|
| Inj Vol       | 0.5         | InjPosition | SampleType      | Sample       | IRM Calibration Status |
| Data Filename | LZQ-3-176.d | ACQ Method  | #CYM-YJ-11MIN.m | Comment      | Acquired Time          |

Success  
3/9/2026 3:57:

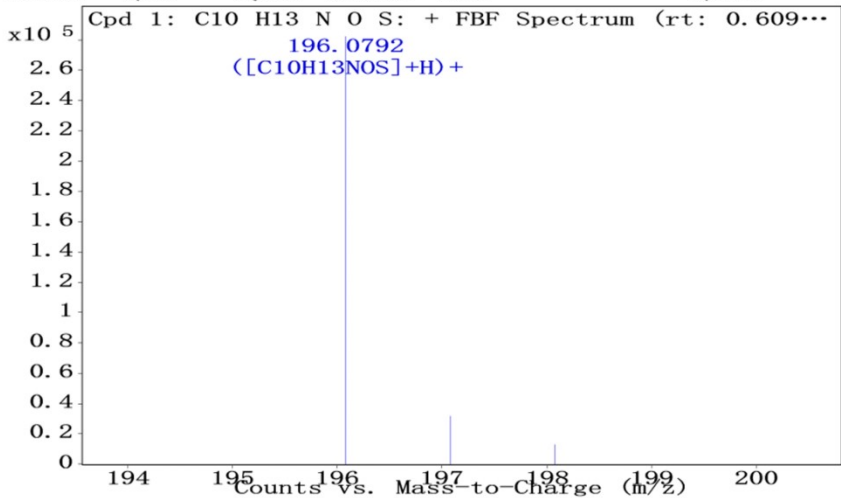

### 3-methyl-3-(p-tolyl)-1,4,2-oxathiazinane (3b).

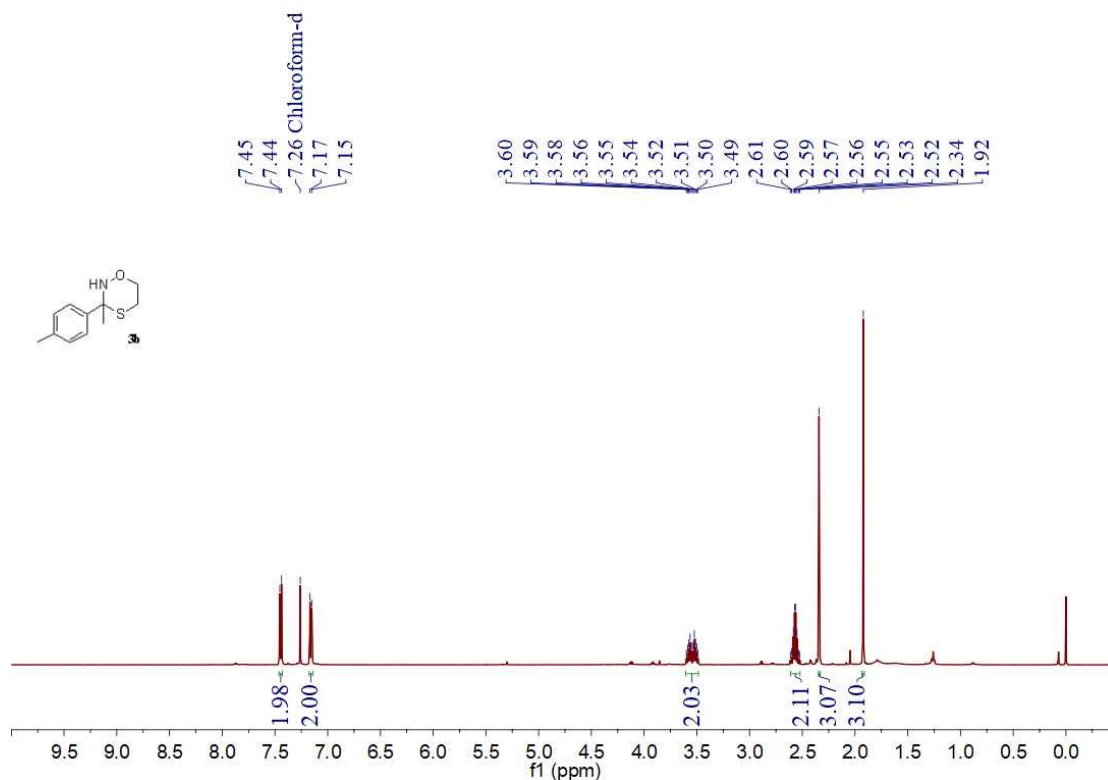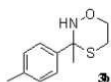

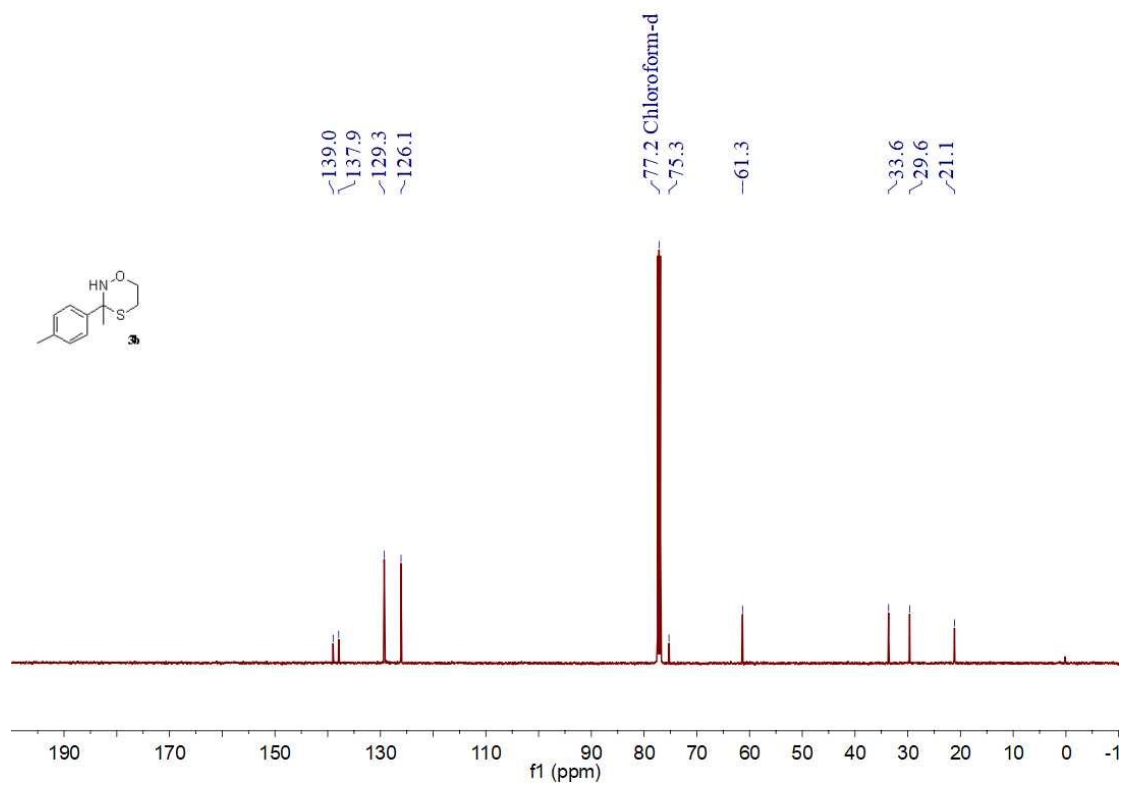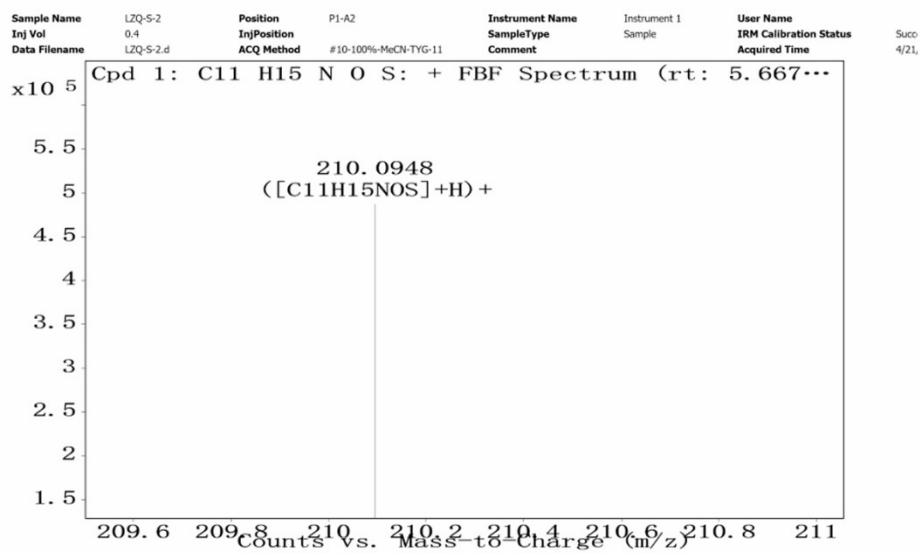

**3-methyl-3-(4-propylphenyl)-1,4,2-oxathiazinane (3c).**

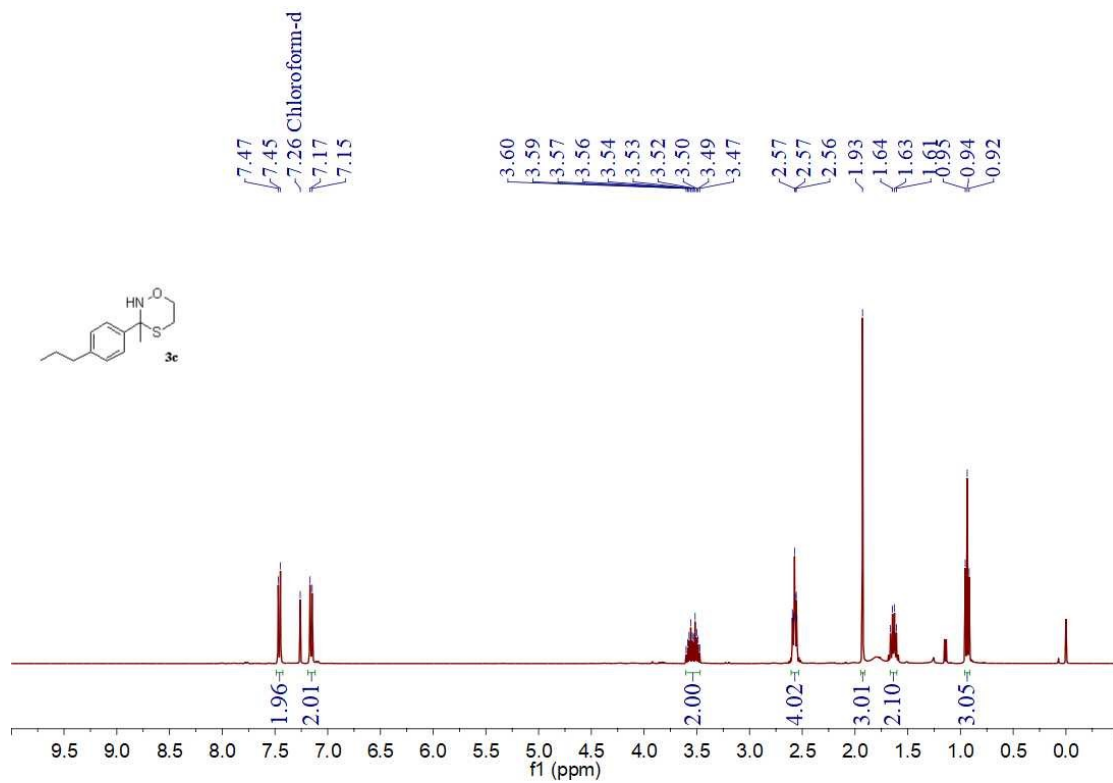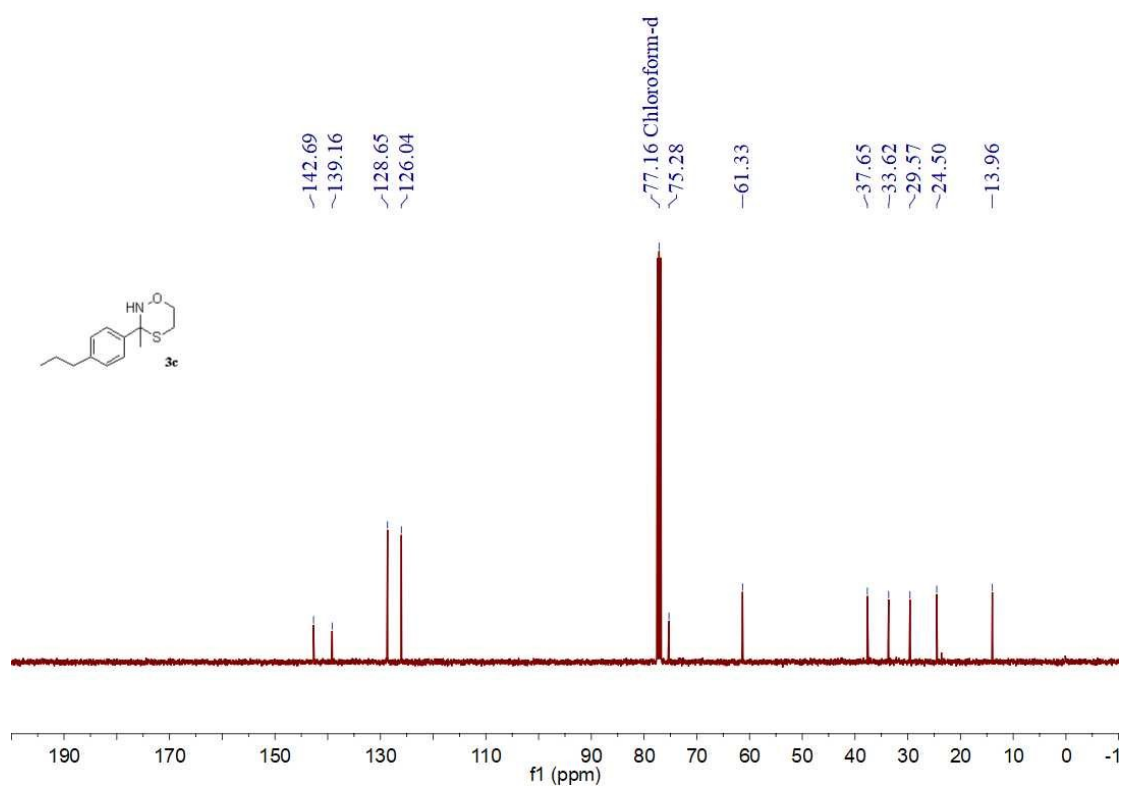

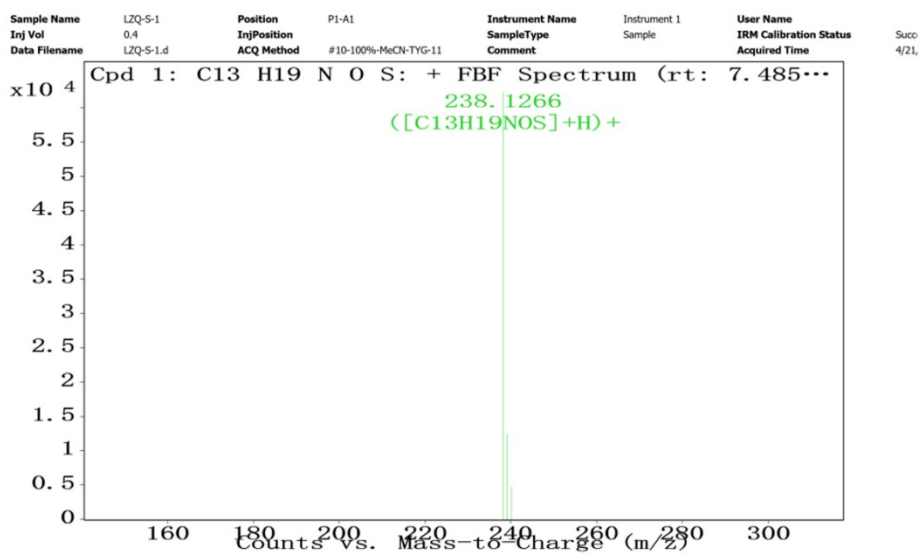

### 3-(4-(tert-butyl)phenyl)-3-methyl-1,4,2-oxathiazinane (3d).

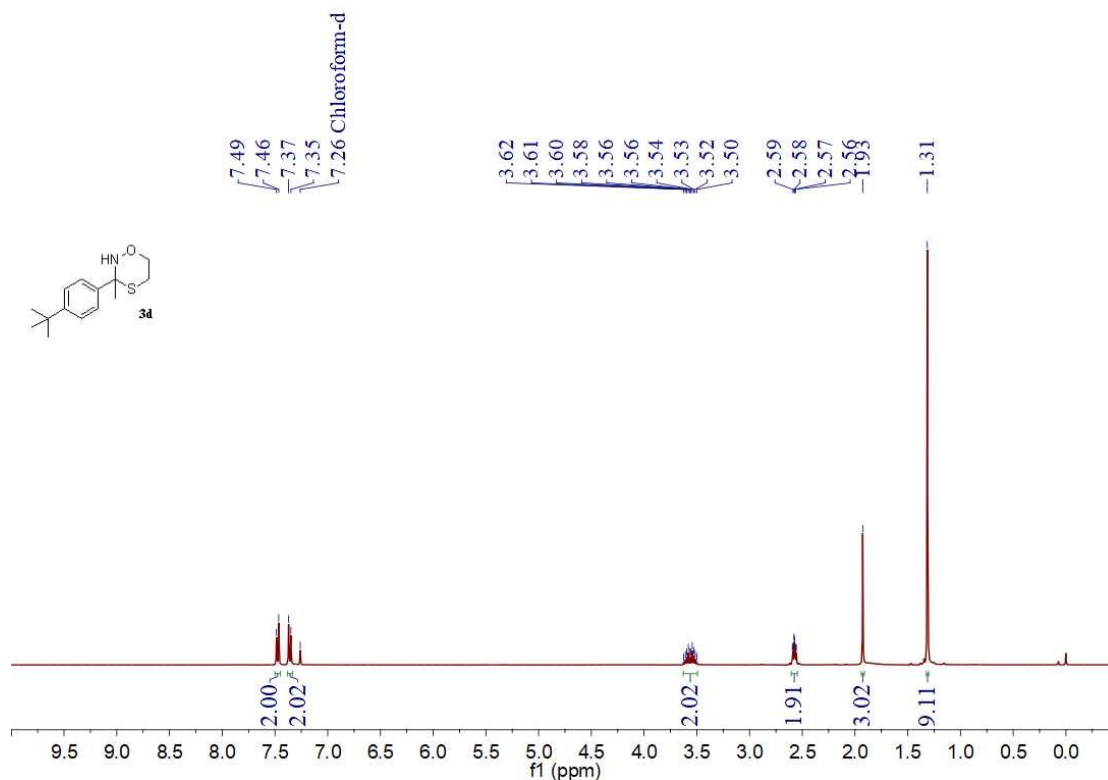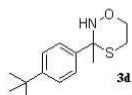

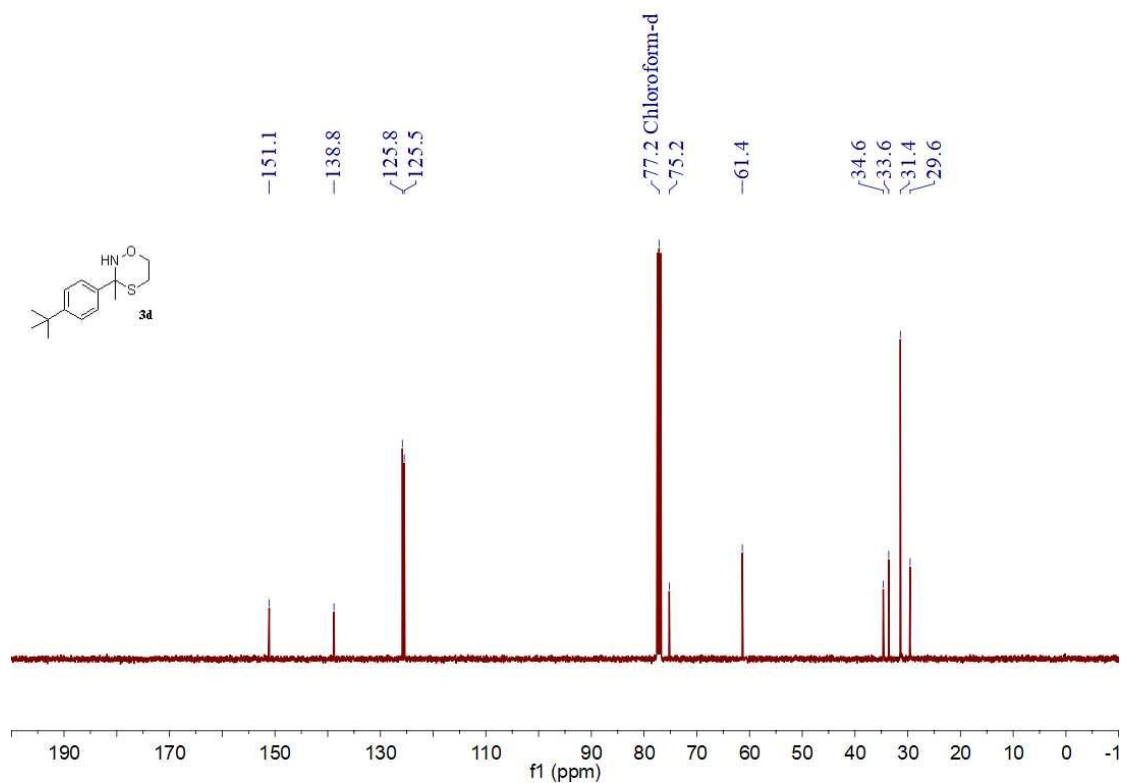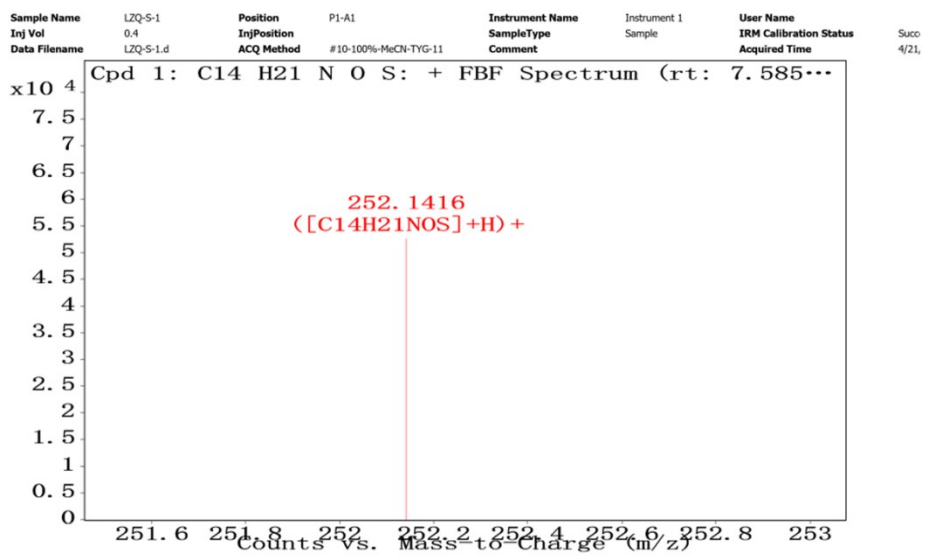

2-([1,1'-biphenyl]-4-yl)-2-methyl-1,4,3-oxathiazinane (3e).

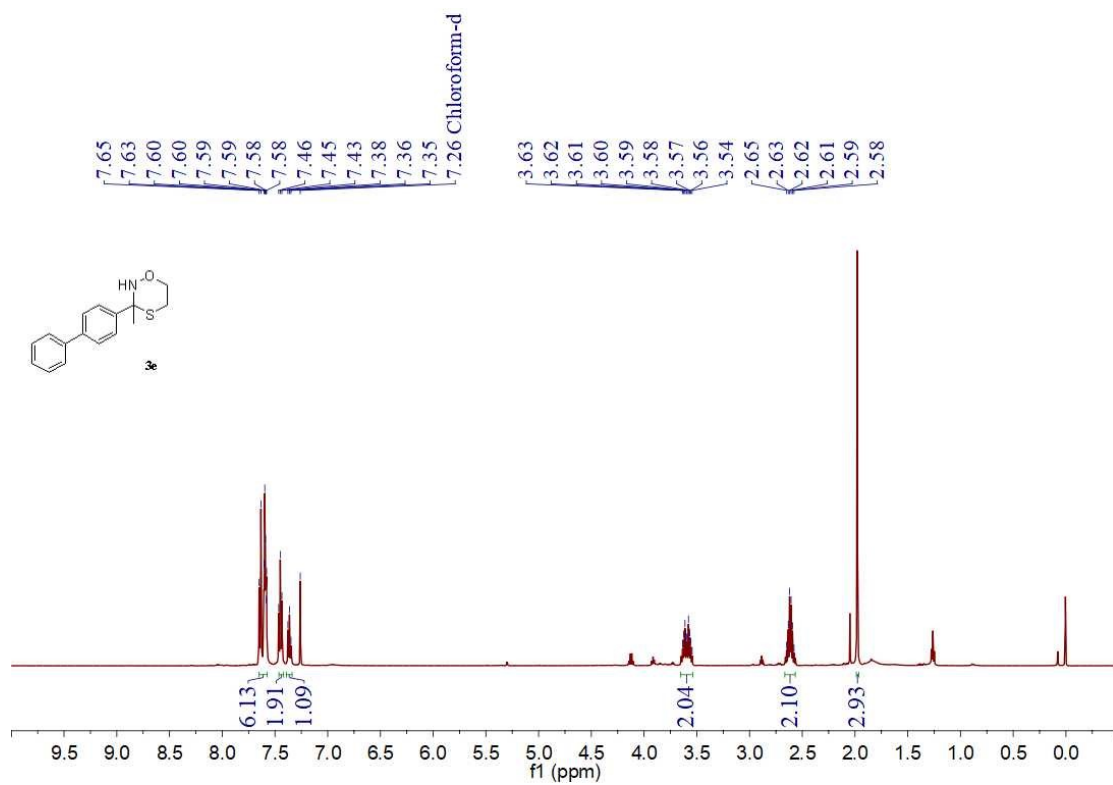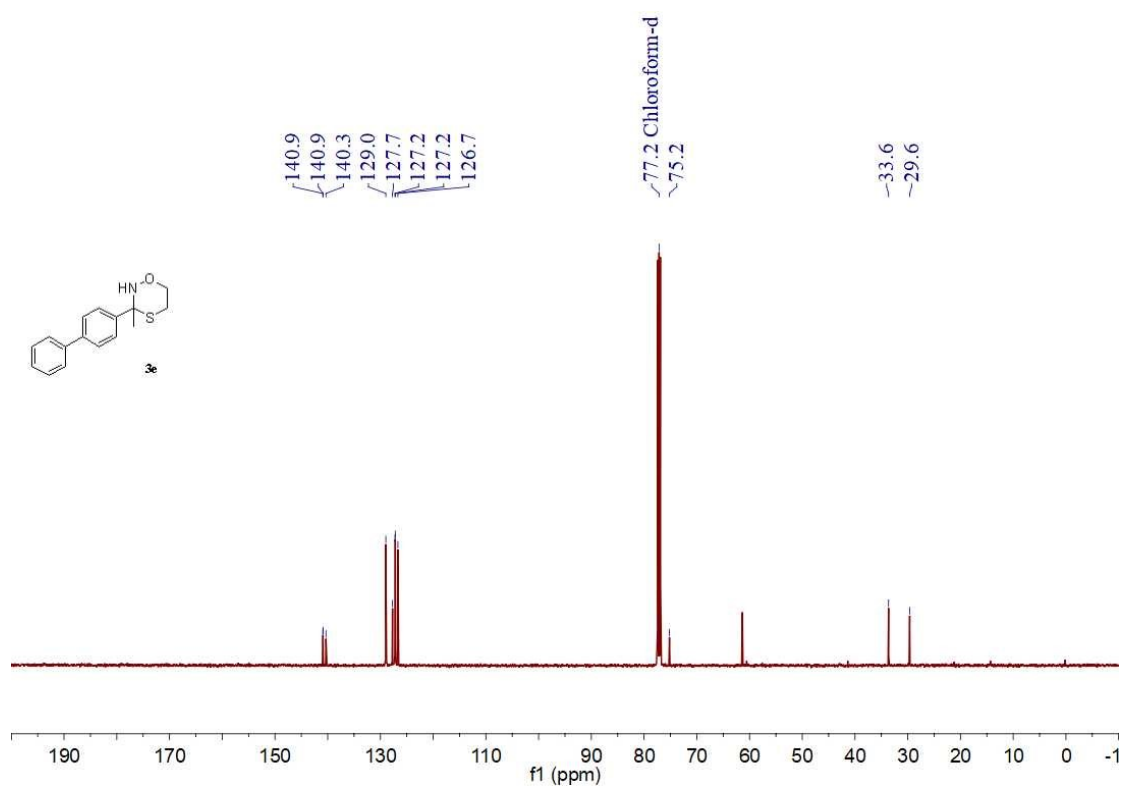

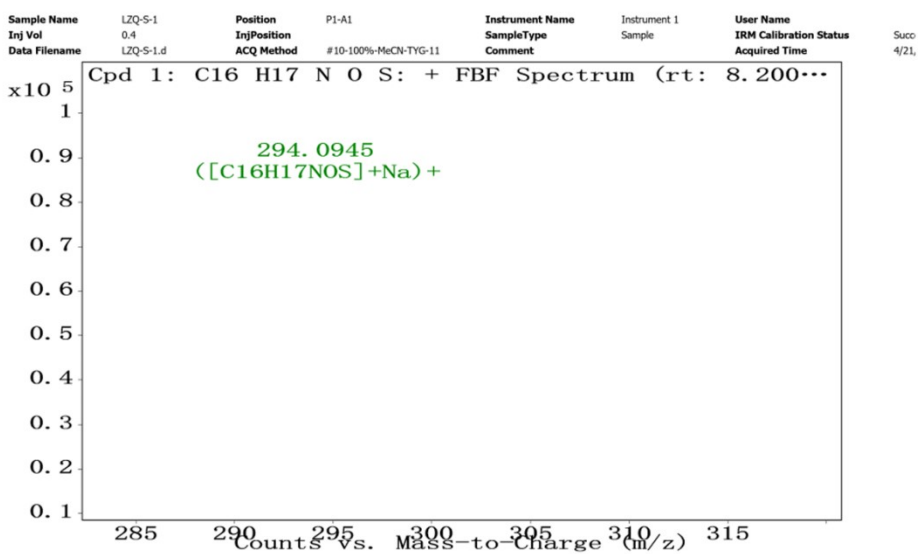

**2-(4-fluorophenyl)-2-methyl-1,4,3-oxathiazinane(3f).**

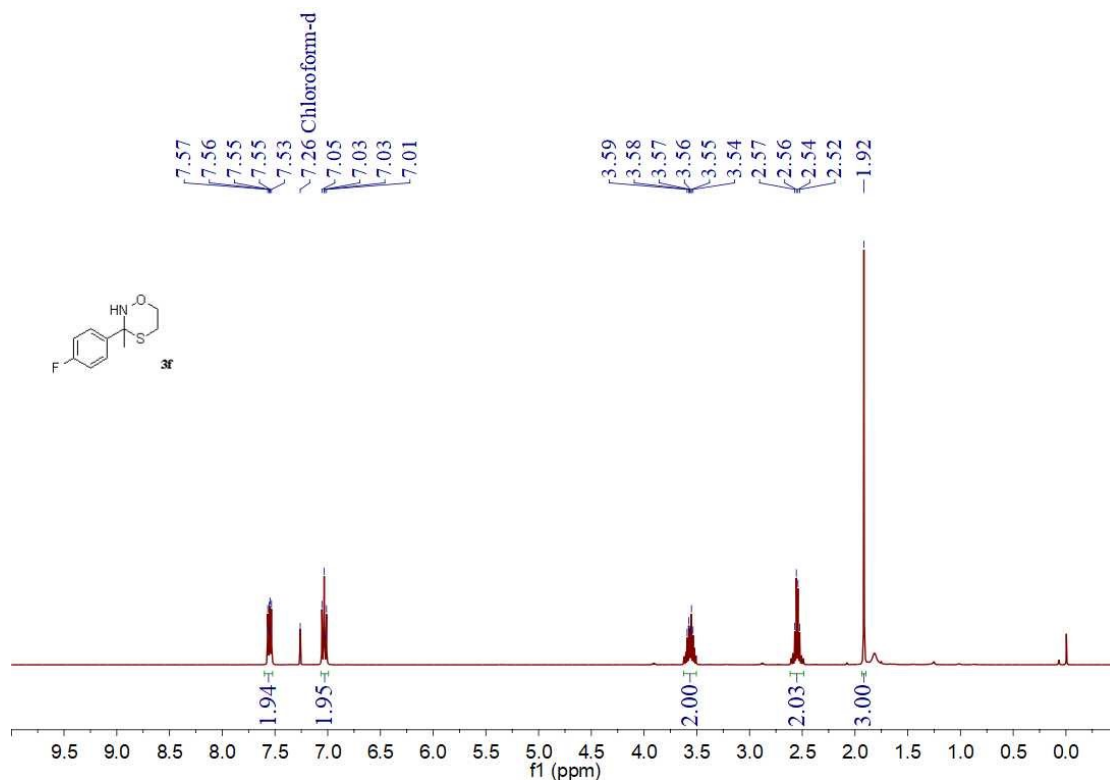

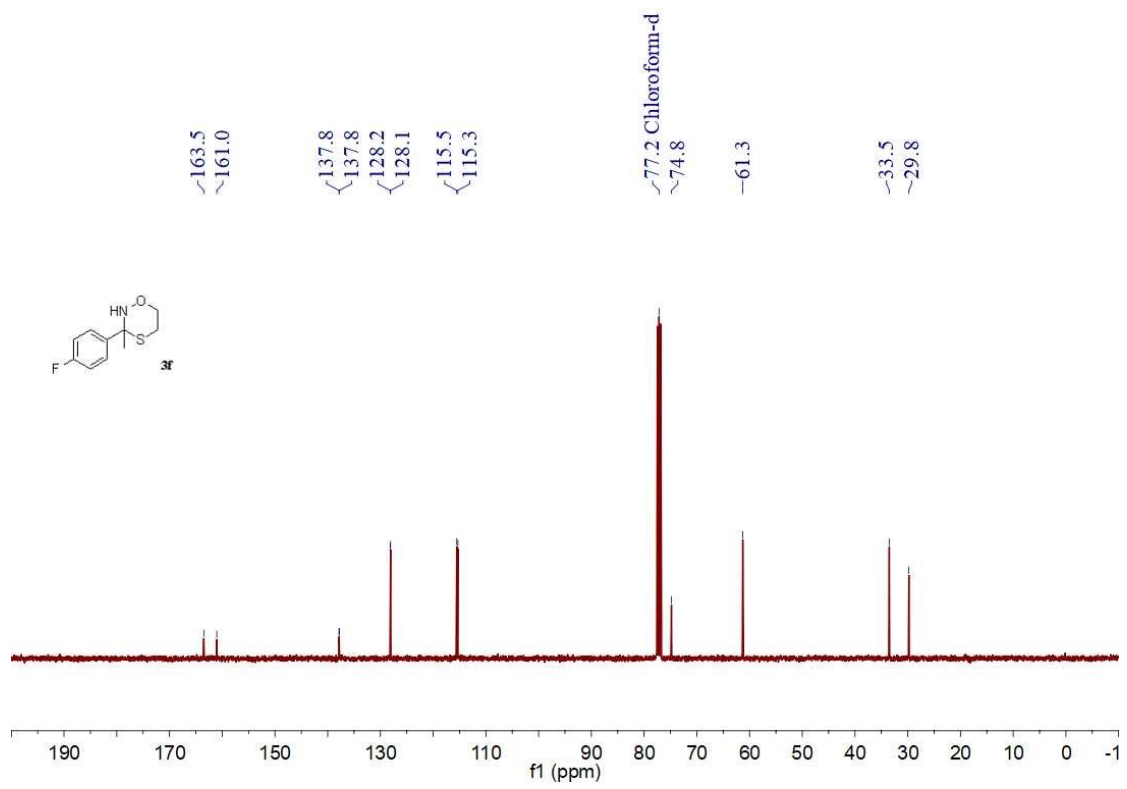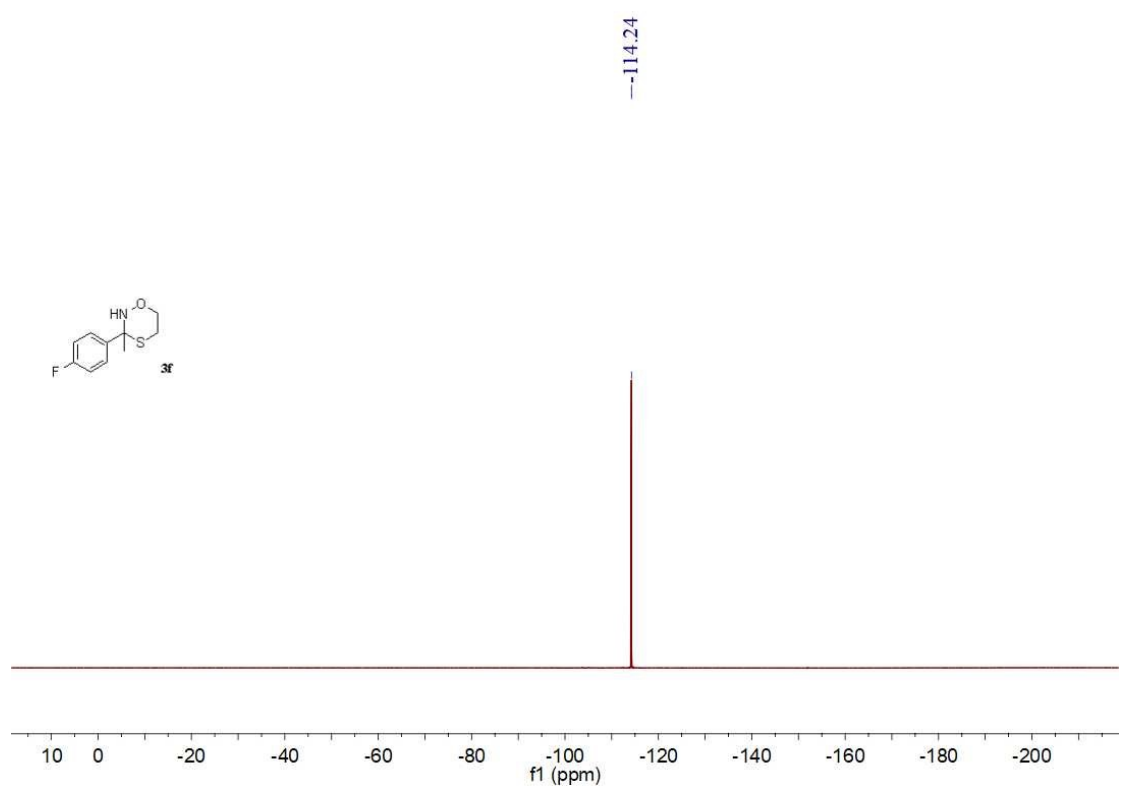

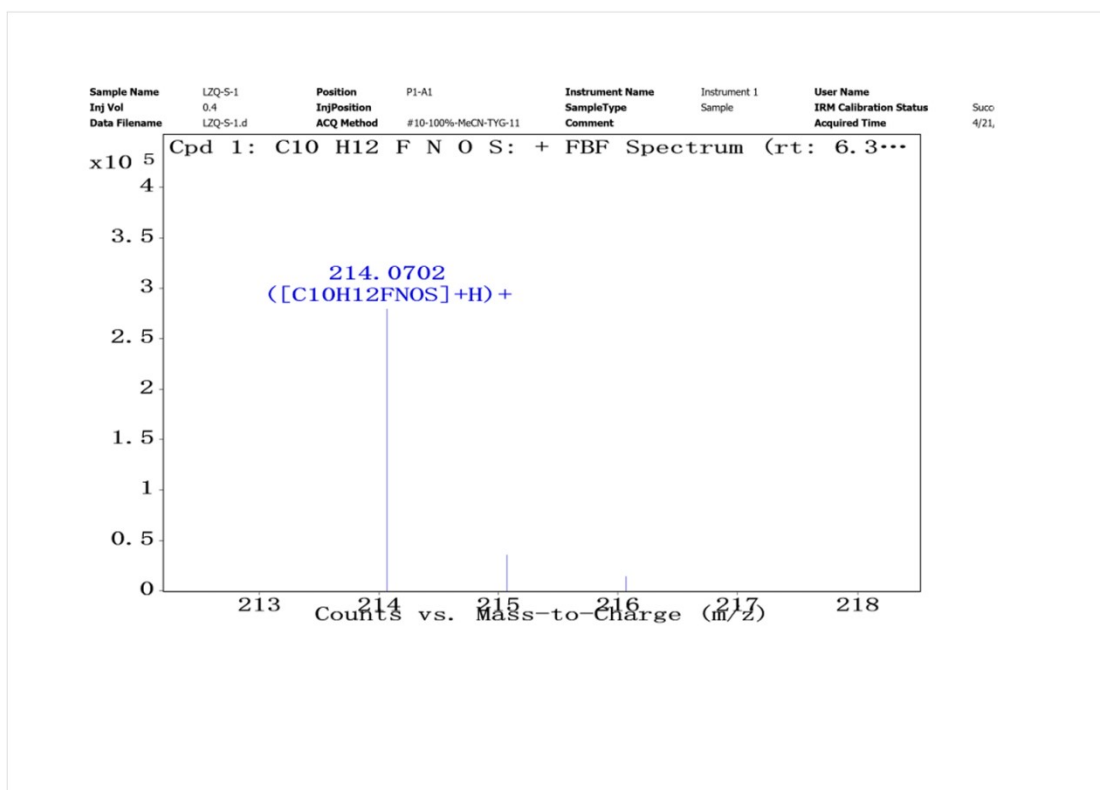

2-(4-chlorophenyl)-2-methyl-1,4,3-oxathiazinane (3g).

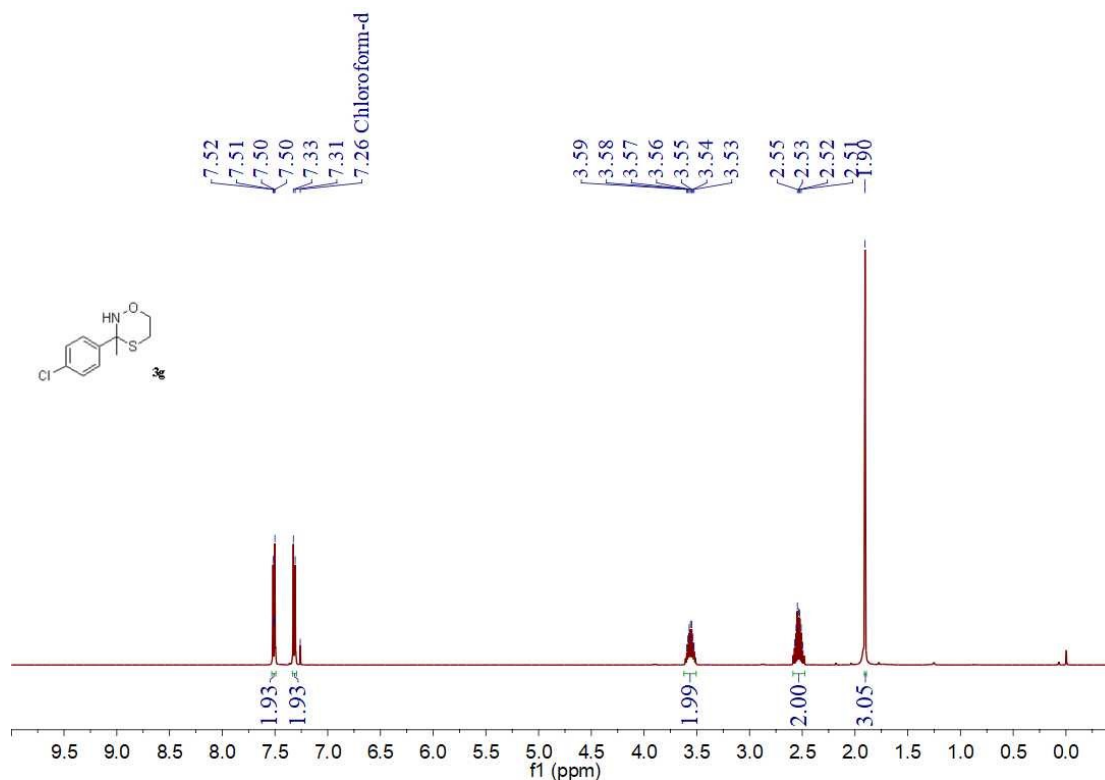

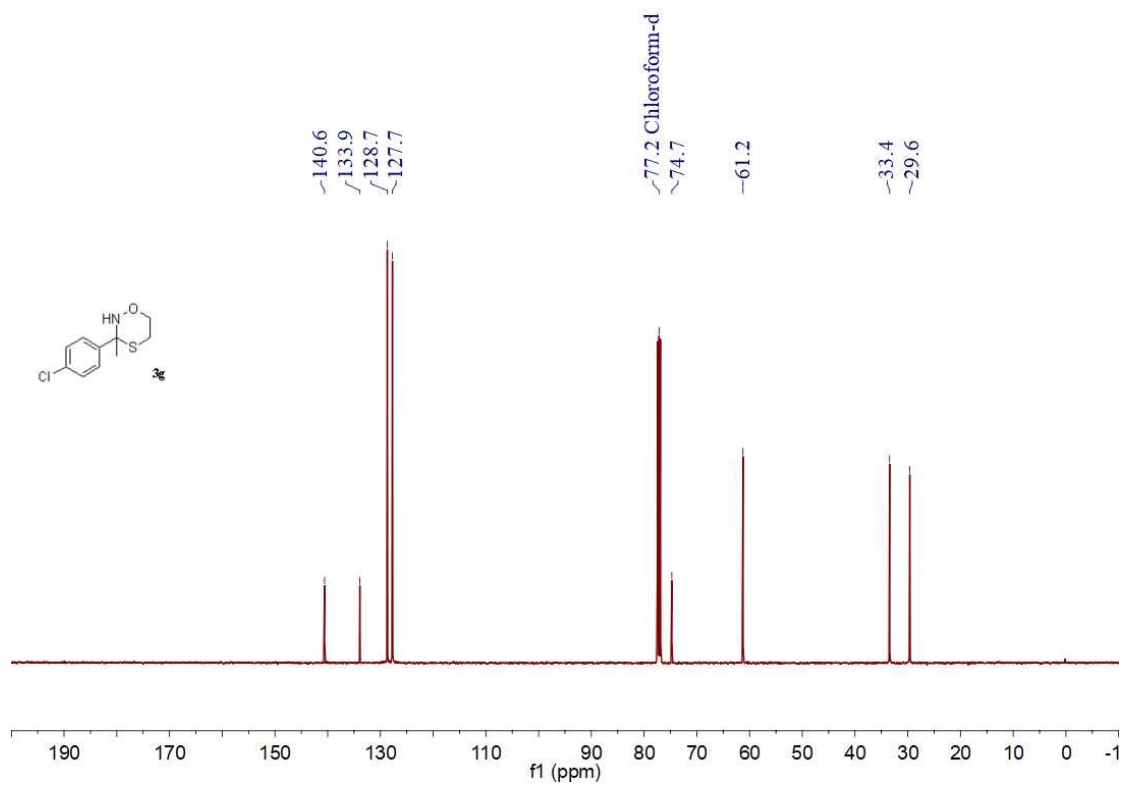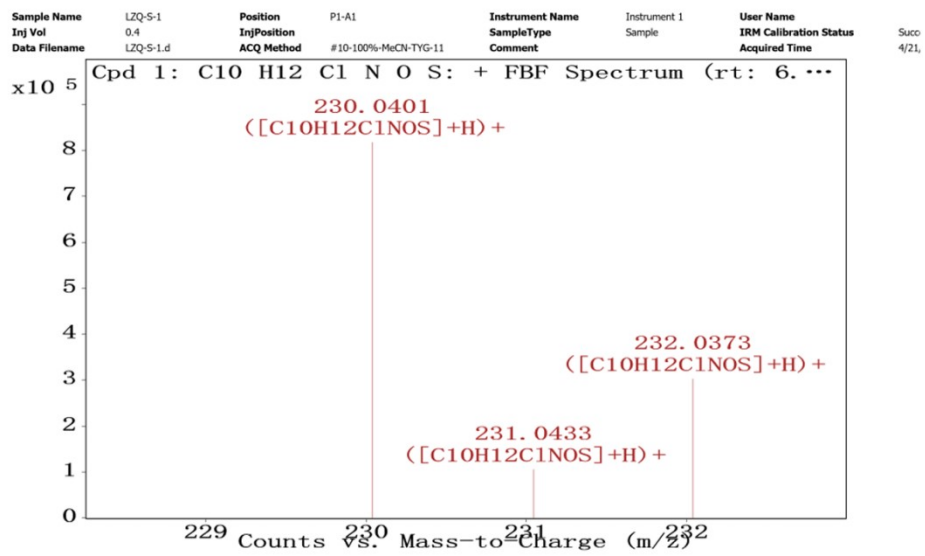

2-(4-bromophenyl)-2-methyl-1,4,3-oxathiazinane (3h).

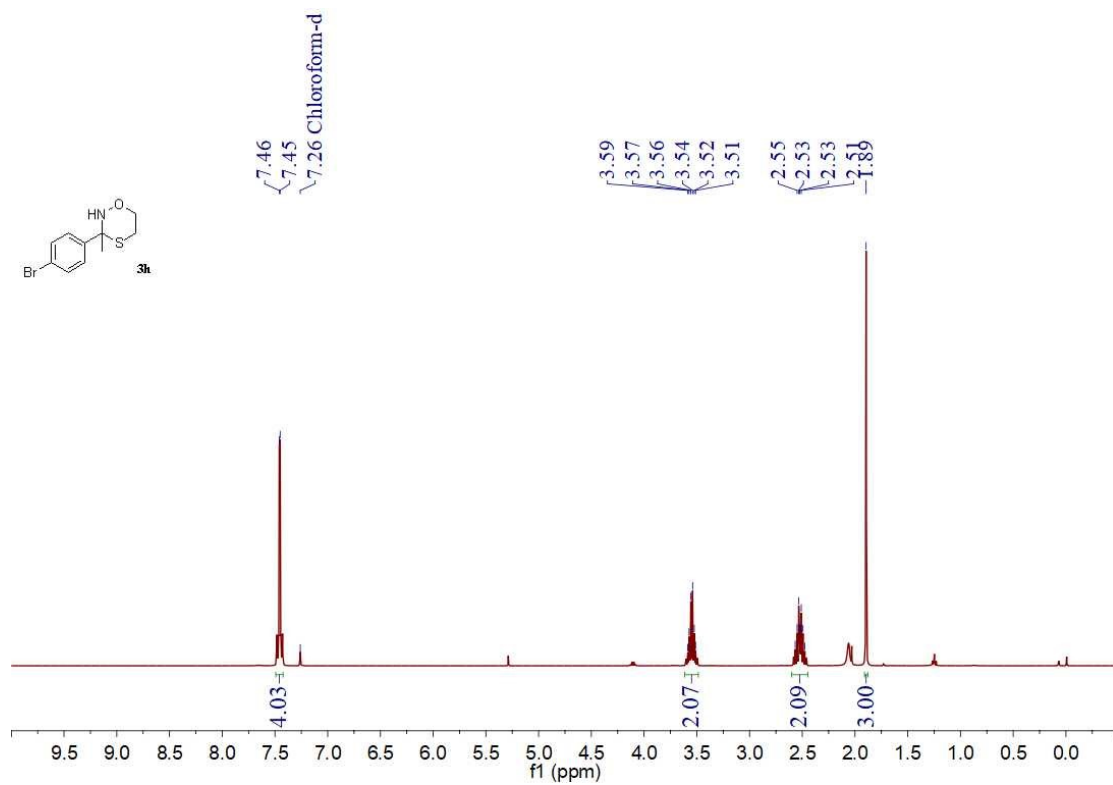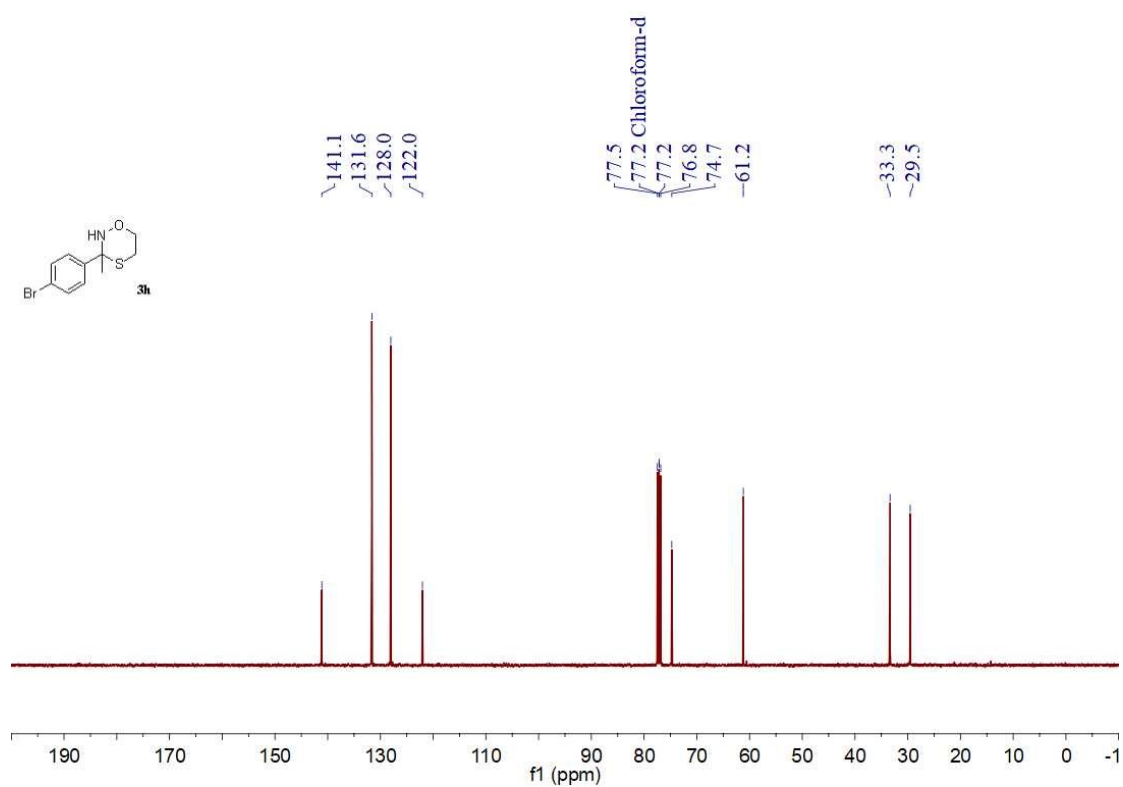

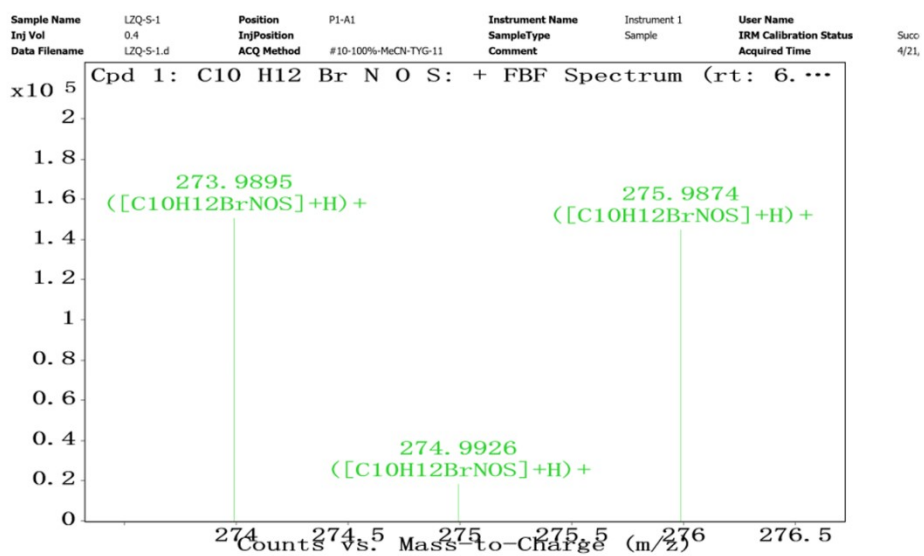

**2-methyl-2-(4-(trifluoromethyl)phenyl)-1,4,3-oxathiazinane (3i).**

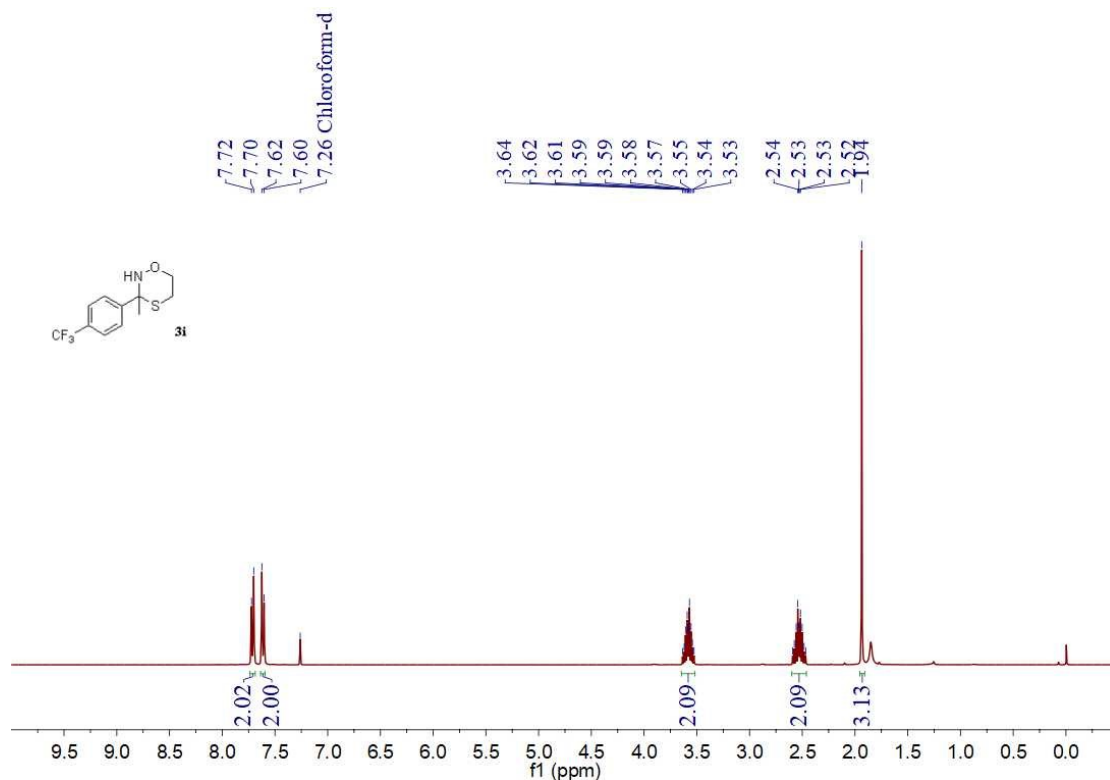

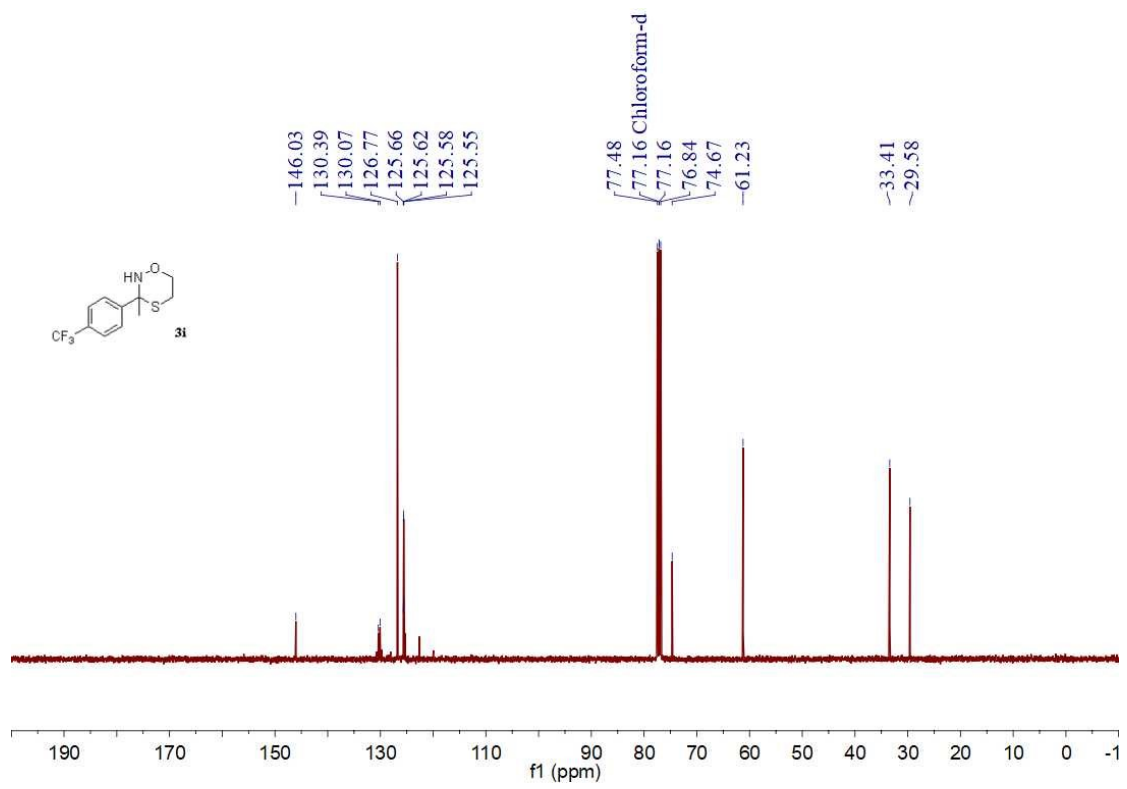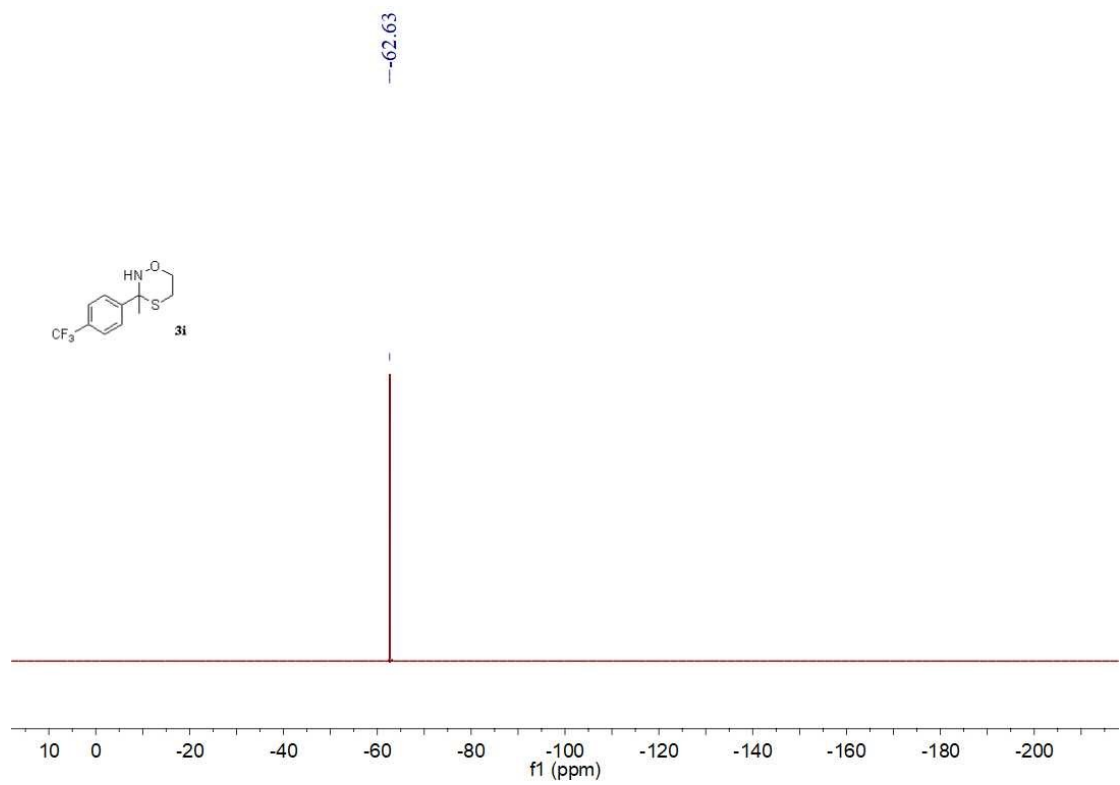

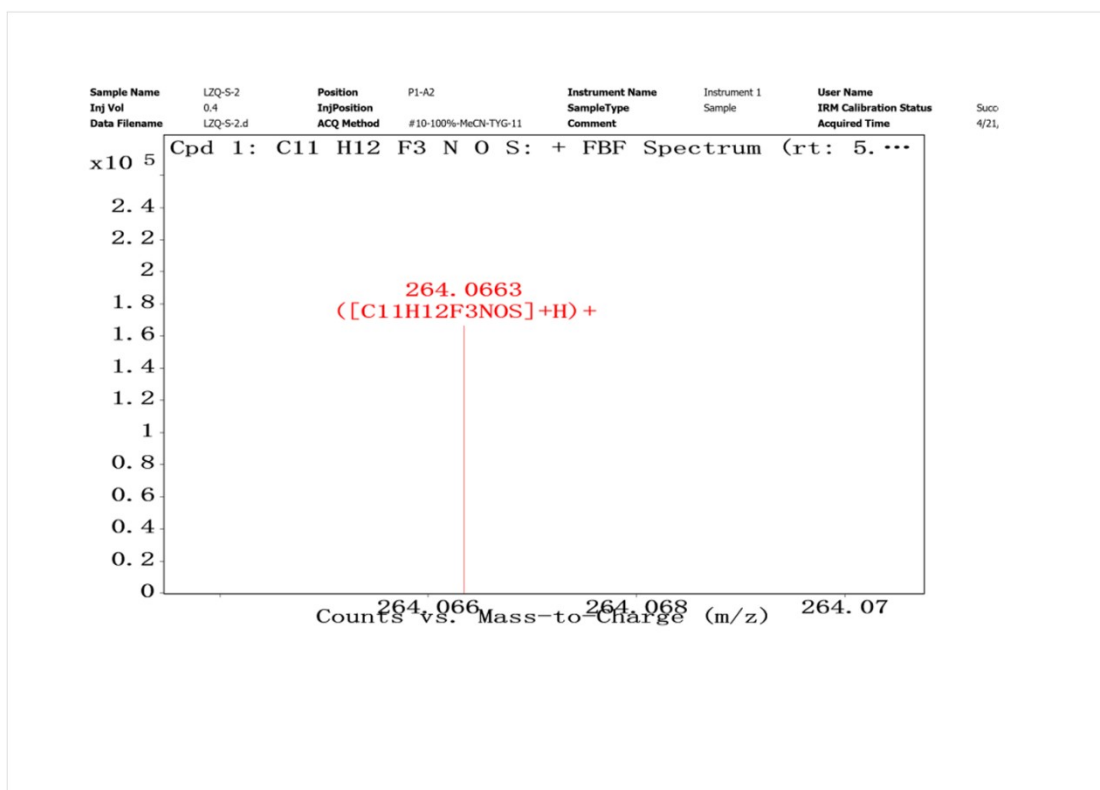

(2-methyl-1,4,3-oxathiazinan-2-yl)benzotrile (**3j**).

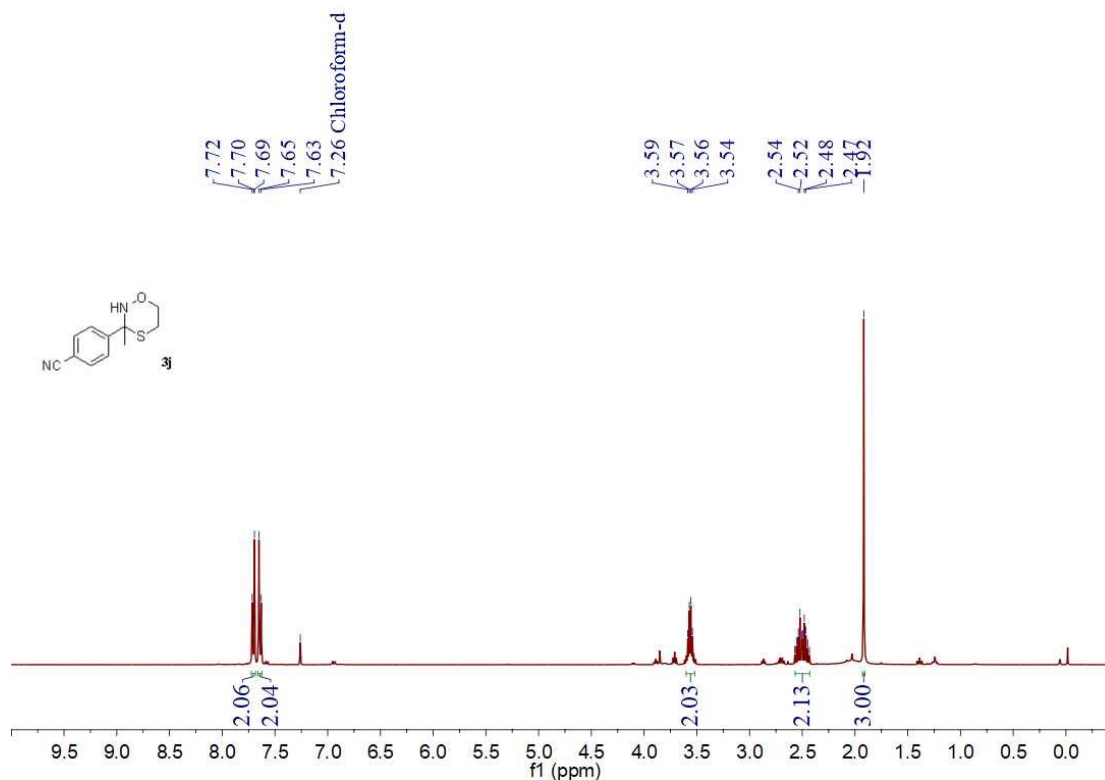

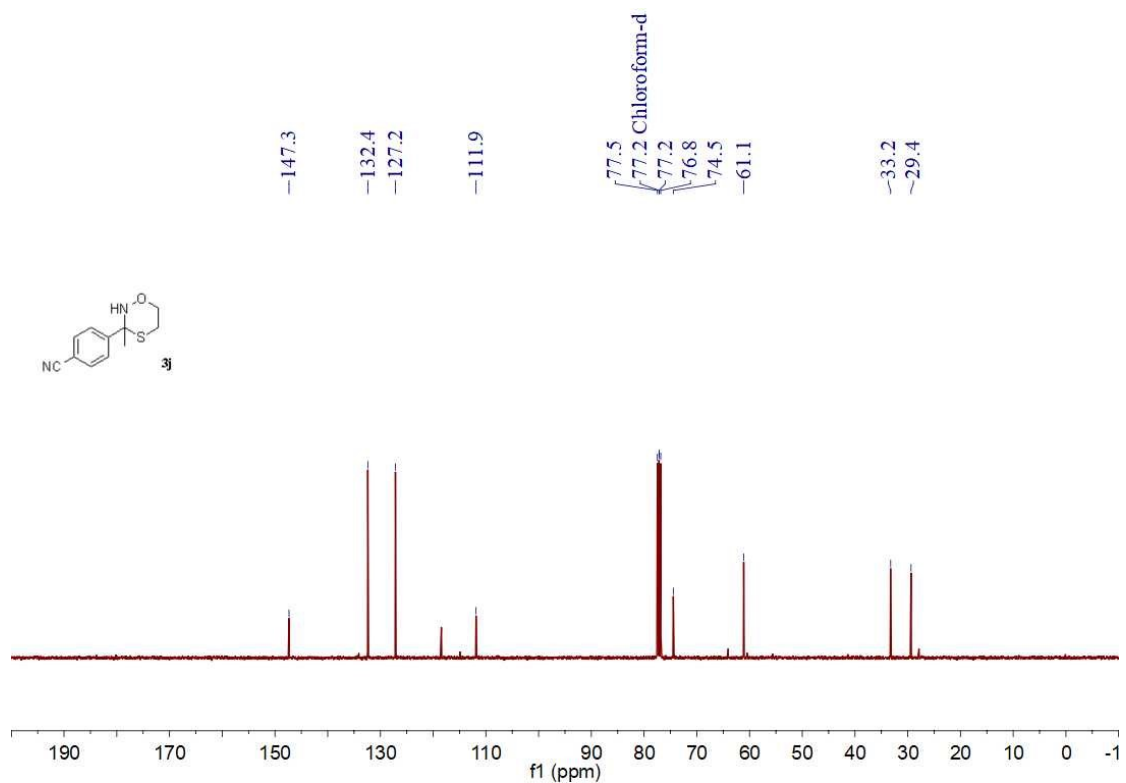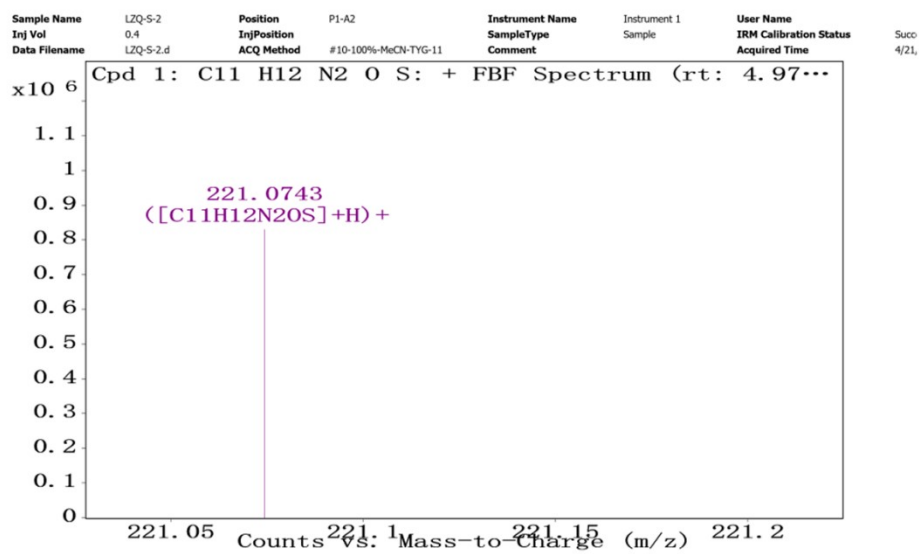

methyl 4-(2-methyl-1,4,3-oxathiazinan-2-yl)benzoate (3k).

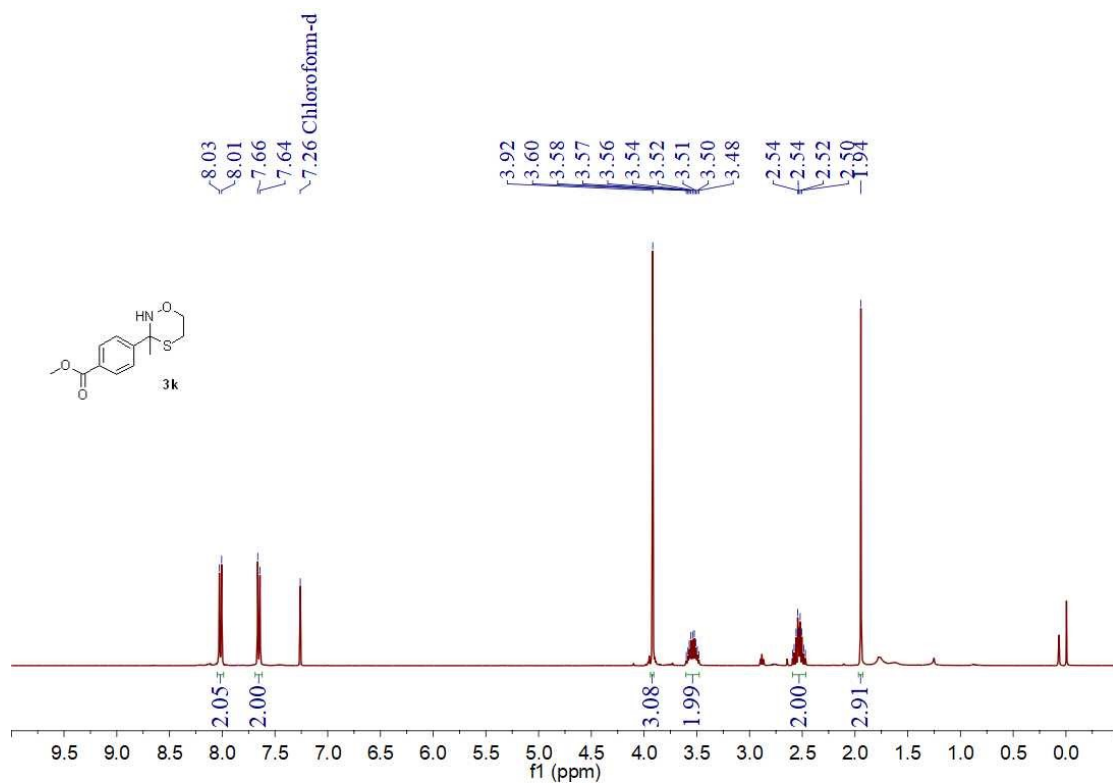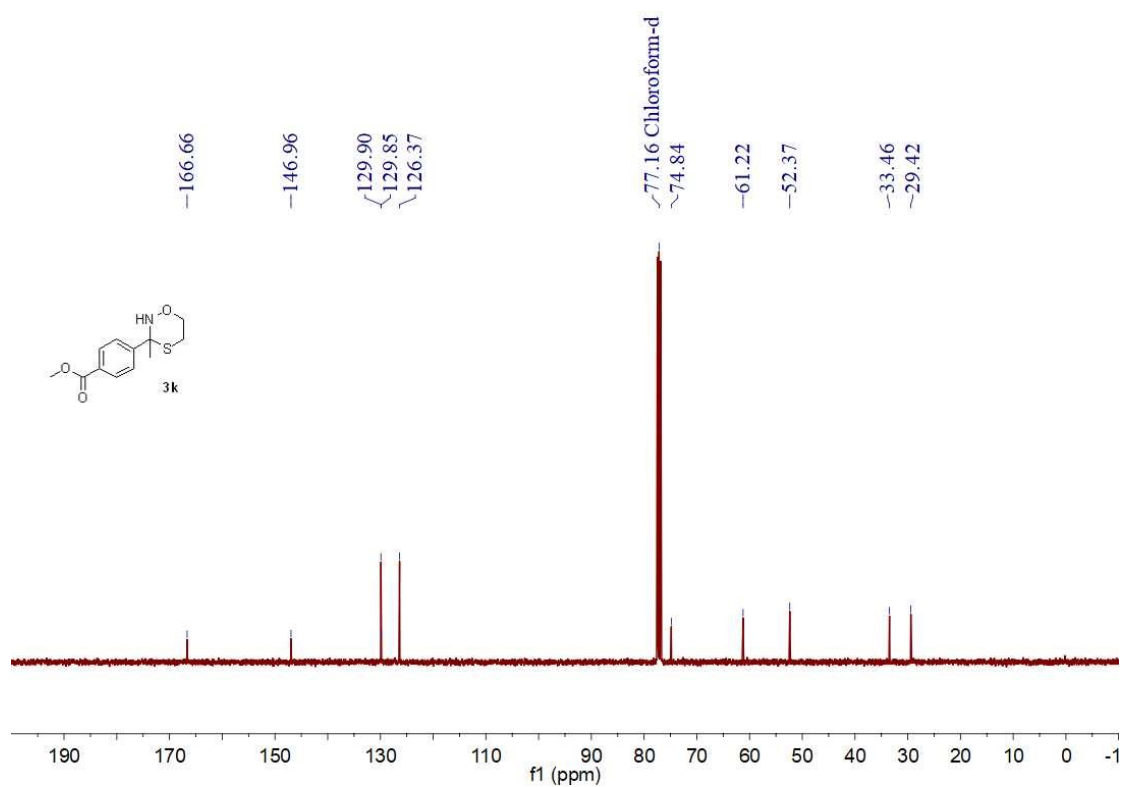

| Sample Name   | LZQ-S-2   | Position    | P1-A2                | Instrument Name | Instrument 1 | User Name              |
|---------------|-----------|-------------|----------------------|-----------------|--------------|------------------------|
| Inj Vol       | 0.4       | InjPosition |                      | SampleType      | Sample       | IRM Calibration Status |
| Data Filename | LZQ-S-2.d | ACQ Method  | #10-100%-MeCN-TYG-11 | Comment         |              | Acquired Time          |

Suo  
4/21,

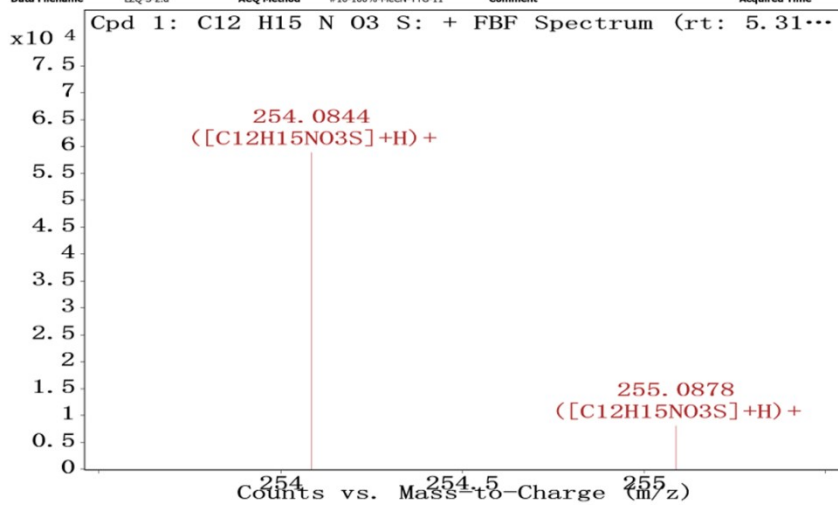

**2-methyl-2-(m-tolyl)-1,4,3-oxathiazinane (31).**

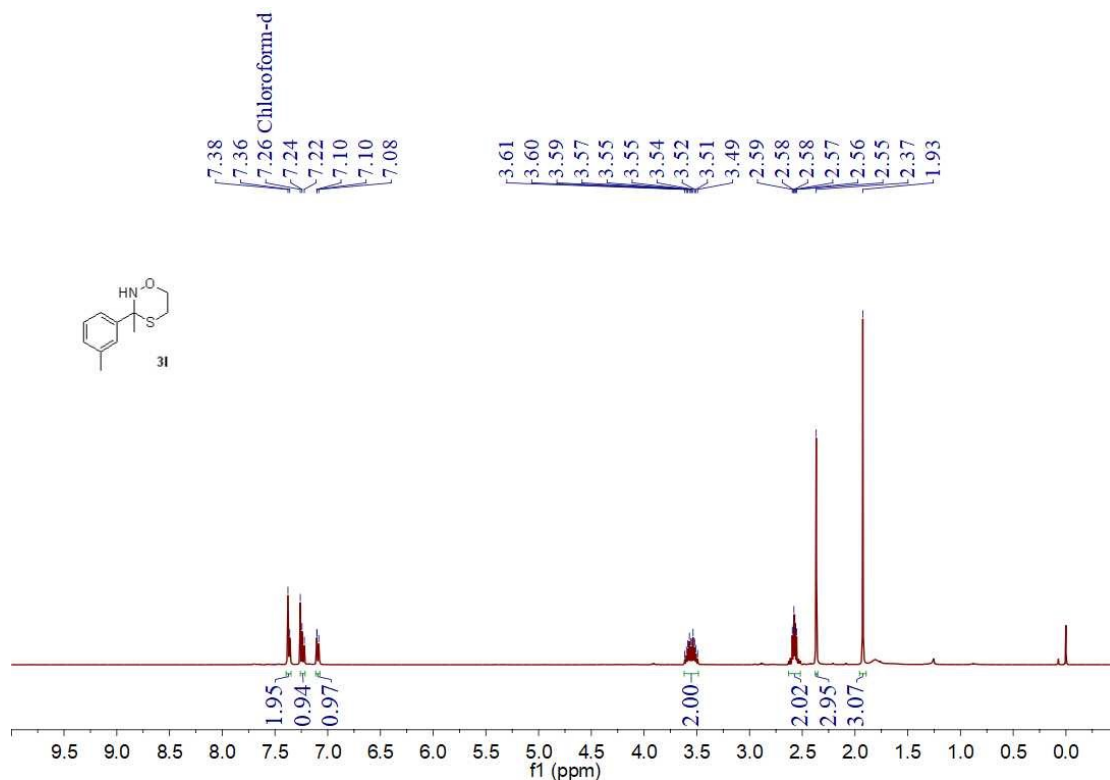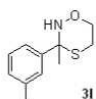

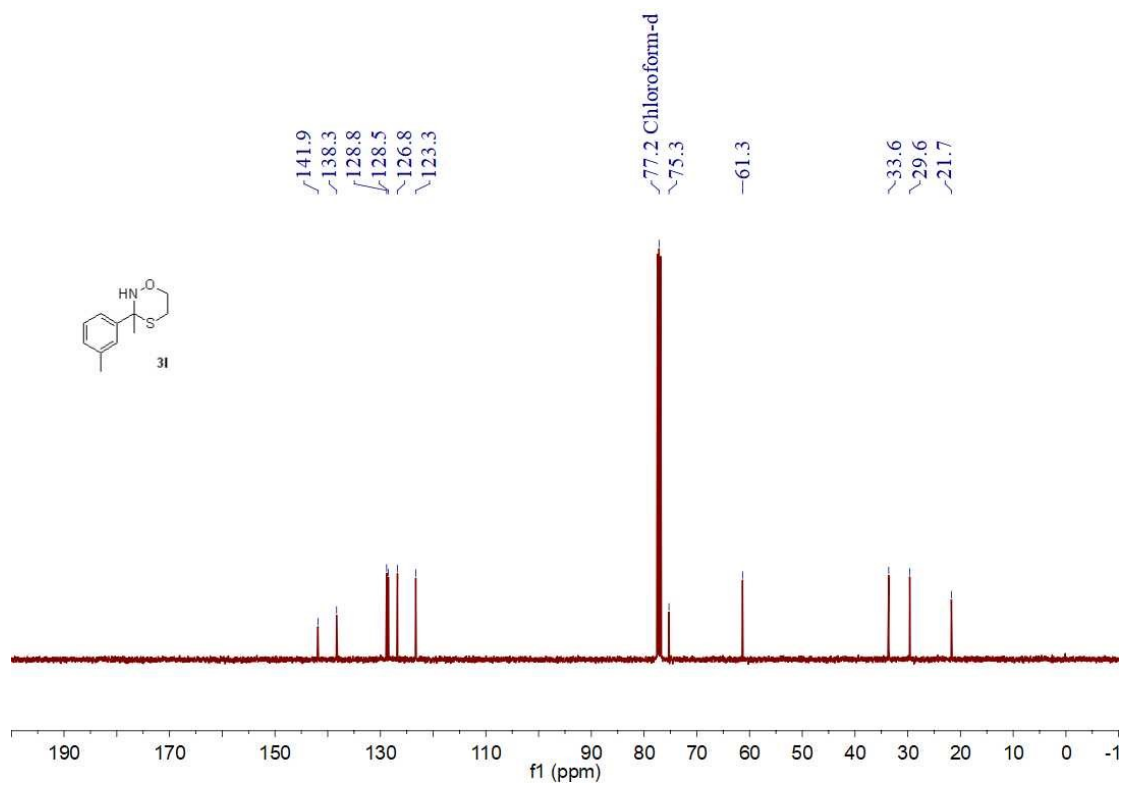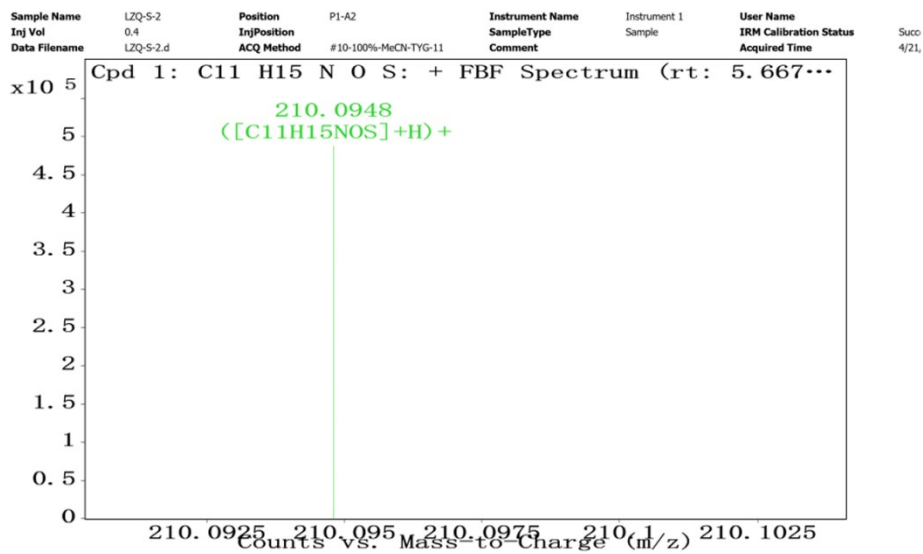

2-(3-chlorophenyl)-2-methyl-1,4,3-oxathiazinane (3m).

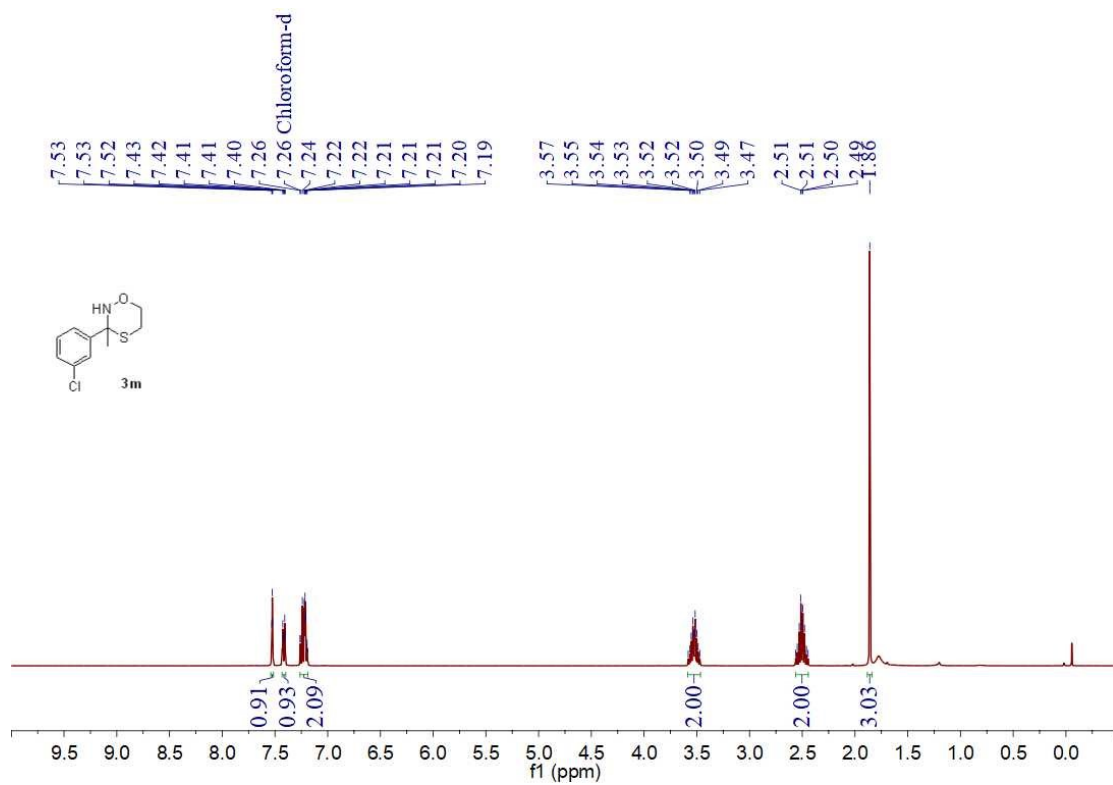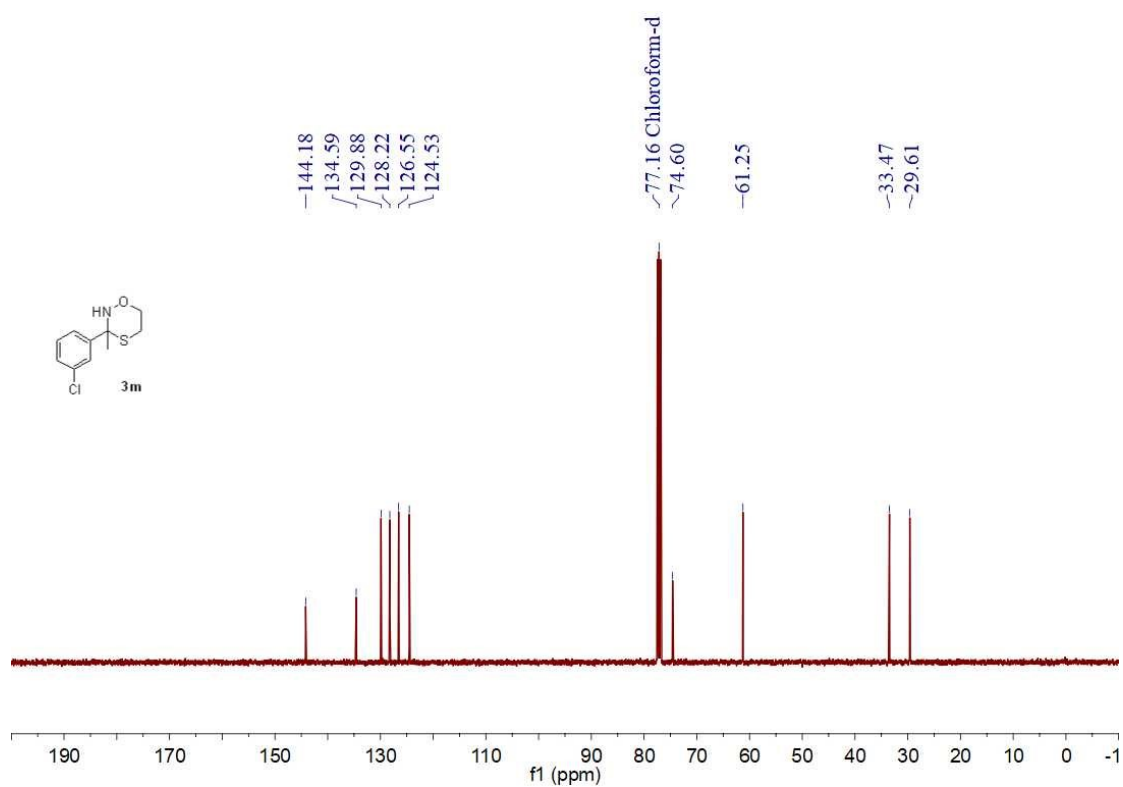

| Sample Name   | LZQ-S-2   | Position    | P1-A2                | Instrument Name | Instrument 1 | User Name              | Suco  |
|---------------|-----------|-------------|----------------------|-----------------|--------------|------------------------|-------|
| Inj Vol       | 0.4       | InjPosition |                      | SampleType      | Sample       | IRM Calibration Status |       |
| Data Filename | LZQ-S-2.d | ACQ Method  | #10-100%-MeCN-TYG-11 | Comment         |              | Acquired Time          | 4/21, |

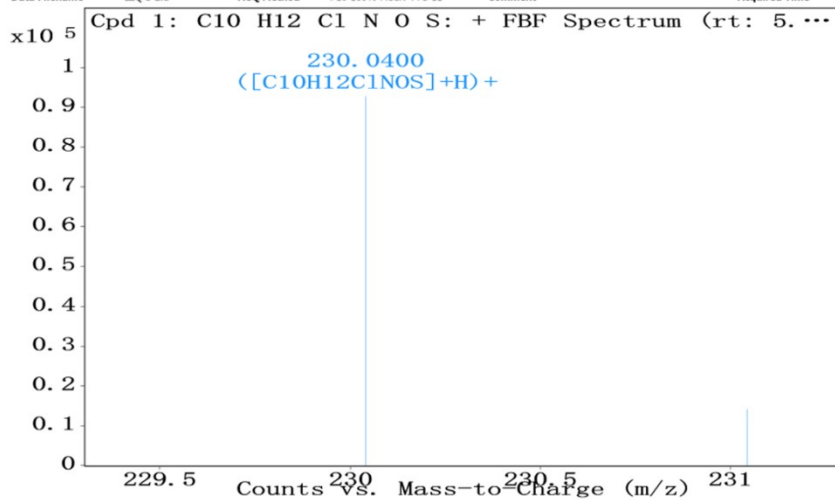

**2-(3,5-difluorophenyl)-2-methyl-1,4,3-oxathiazinane (3n).**

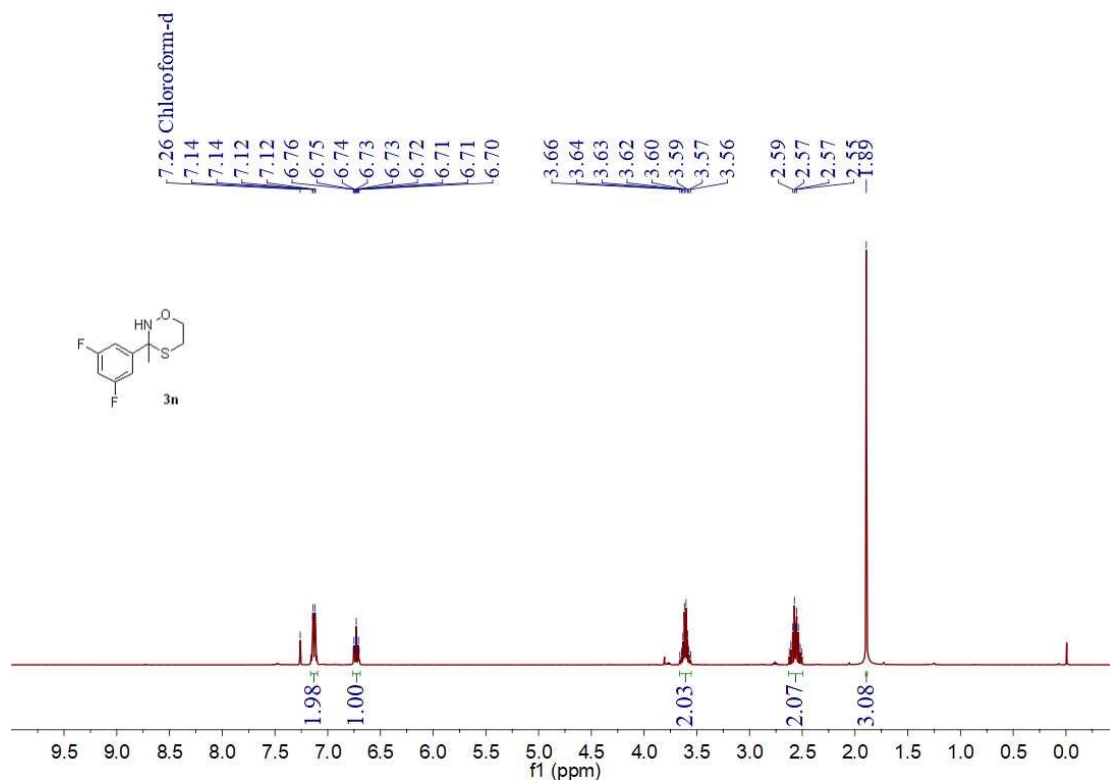

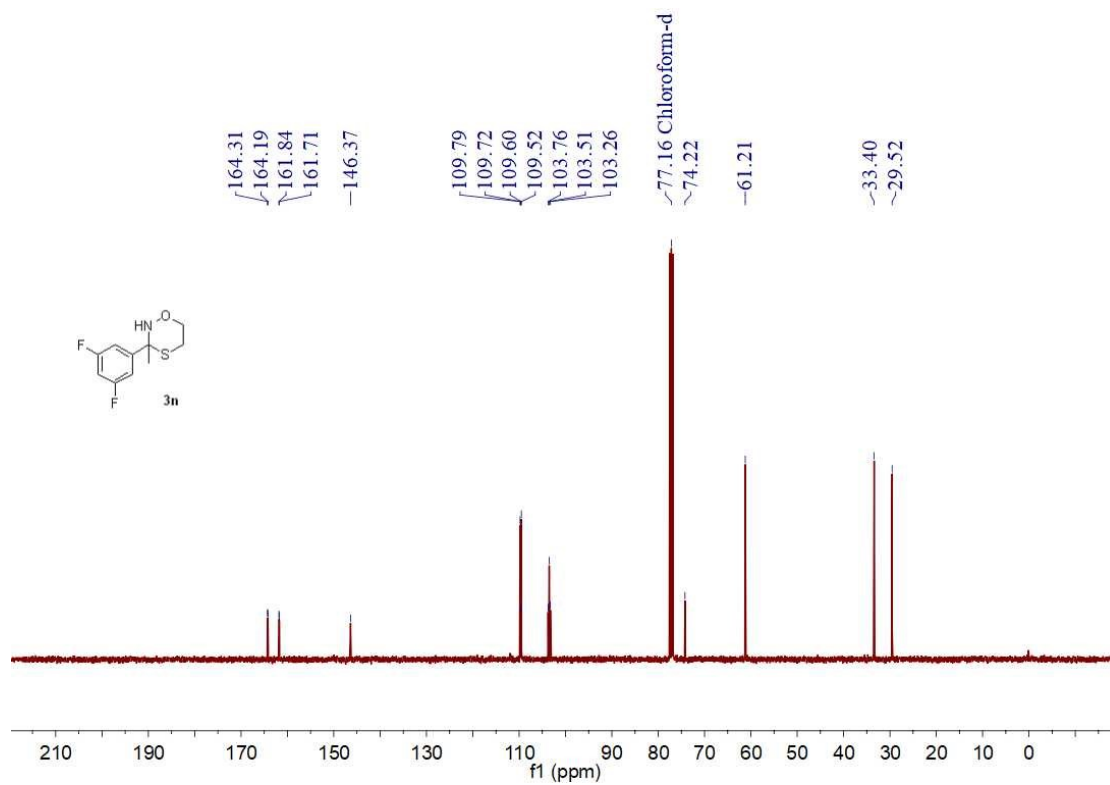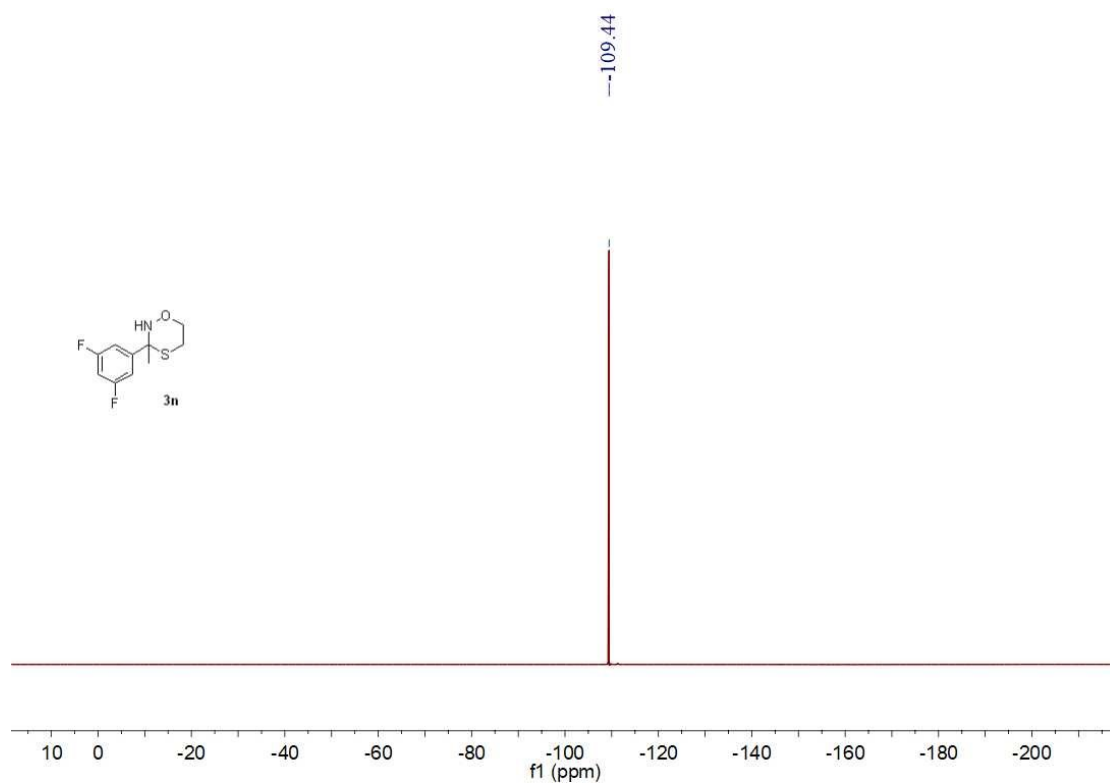

| Sample Name   | LZQ-S-2   | Position    | P1-A2                | Instrument Name | Instrument 1 | User Name              | Suco  |
|---------------|-----------|-------------|----------------------|-----------------|--------------|------------------------|-------|
| Inj Vol       | 0.4       | InjPosition |                      | SampleType      | Sample       | IRM Calibration Status |       |
| Data Filename | LZQ-S-2.d | ACQ Method  | #10-100%-MeCN-TYG-11 | Comment         |              | Acquired Time          | 4/21, |

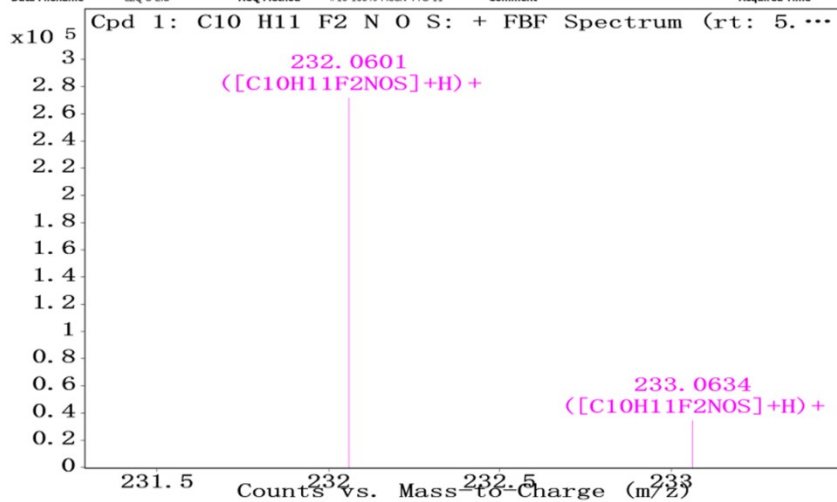

**2-(3,4-dichlorophenyl)-2-methyl-1,4,3-oxathiazinane (30).**

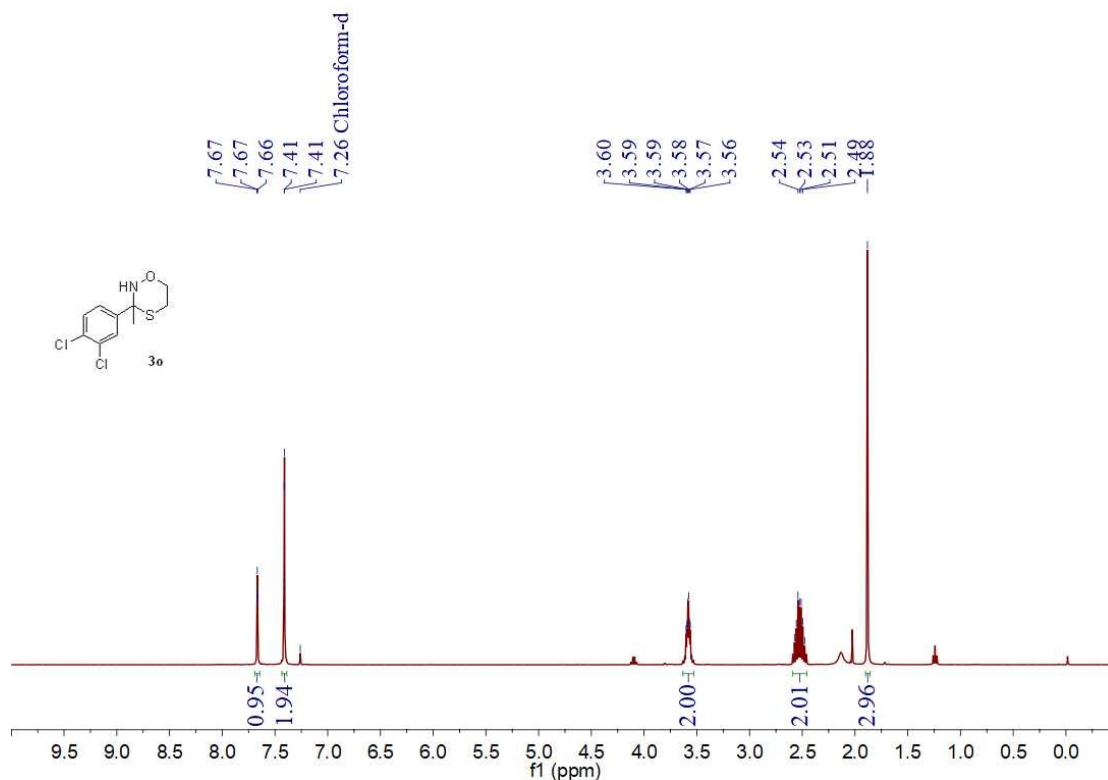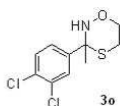

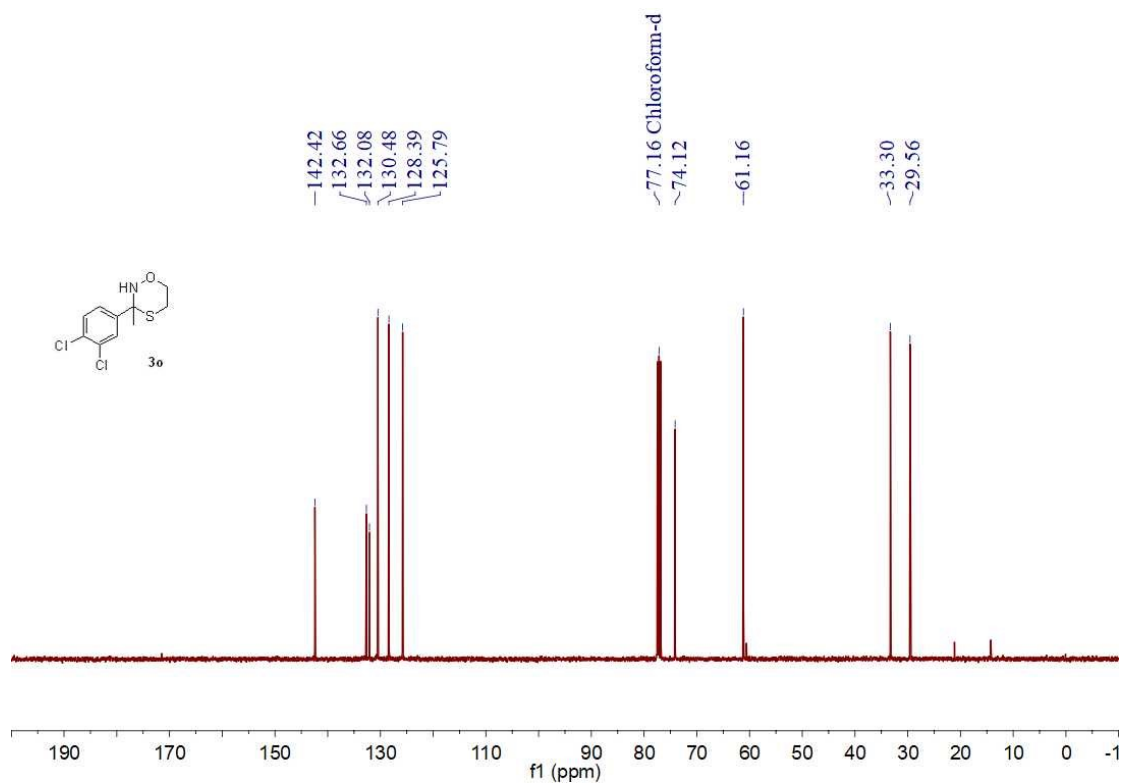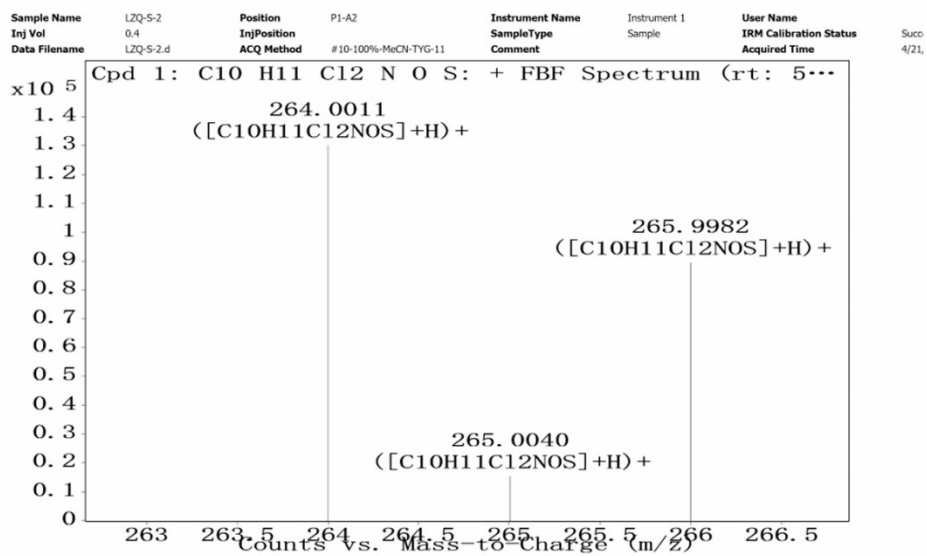

adamantan-1-ylmethyl 4-(2-methyl-1,4,3-oxathiazinan-2-yl)benzoate (3p).

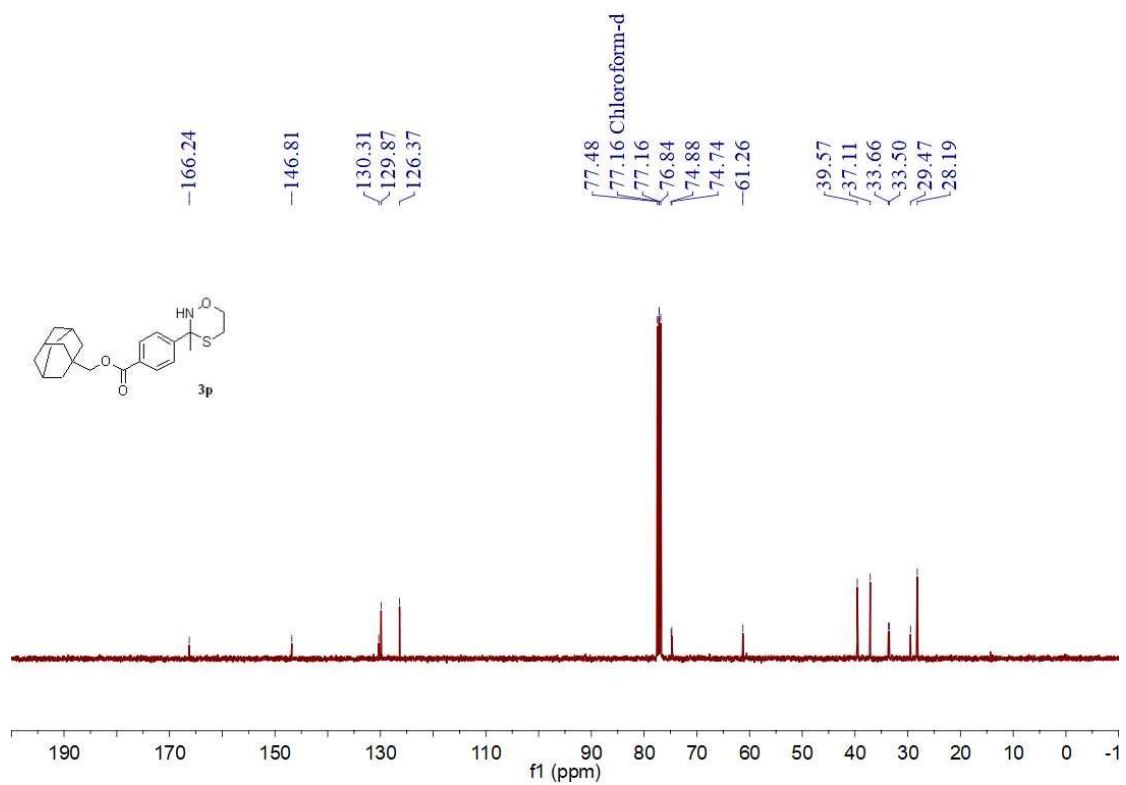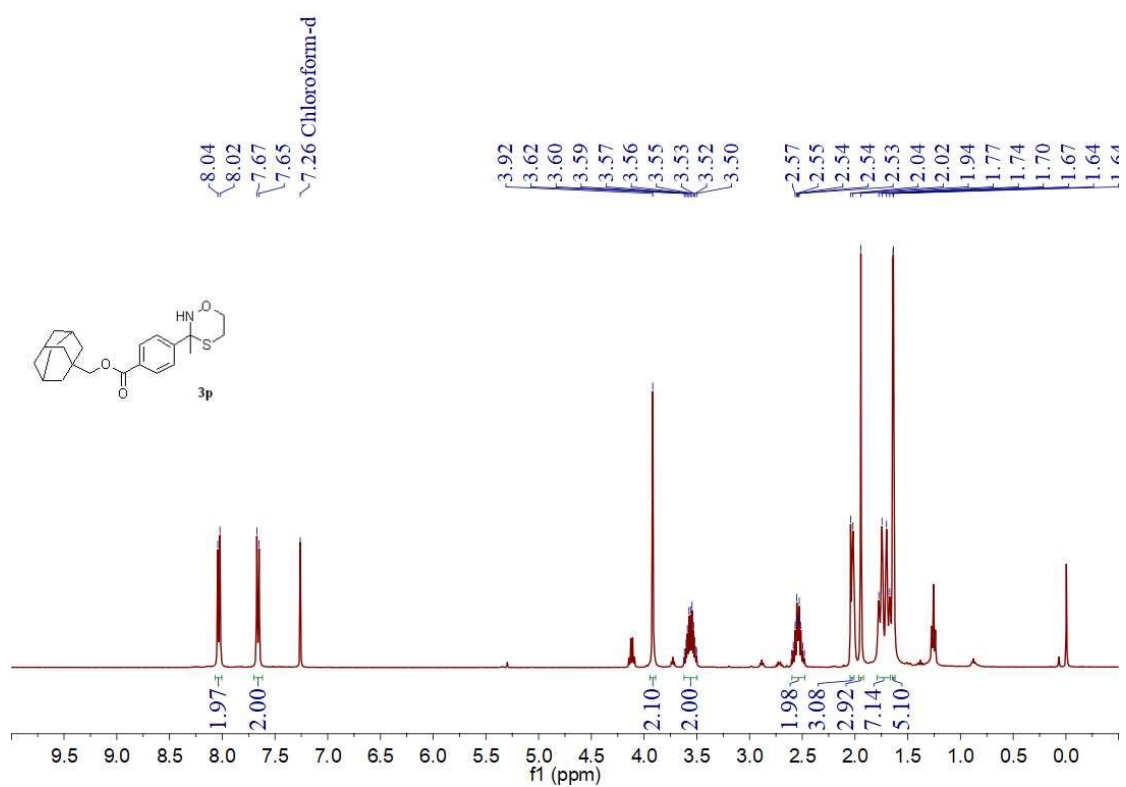

| Sample Name   | P1A1   | Position    | P1-A1               | Instrument Name | Instrument 1 | User Name              | Succ |
|---------------|--------|-------------|---------------------|-----------------|--------------|------------------------|------|
| Inj Vol       | 0.5    | InjPosition |                     | SampleType      | Sample       | IRM Calibration Status | 4/15 |
| Data Filename | 4-75.d | ACQ Method  | ##10-100zmmjachun-7 | Comment         |              | Acquired Time          |      |

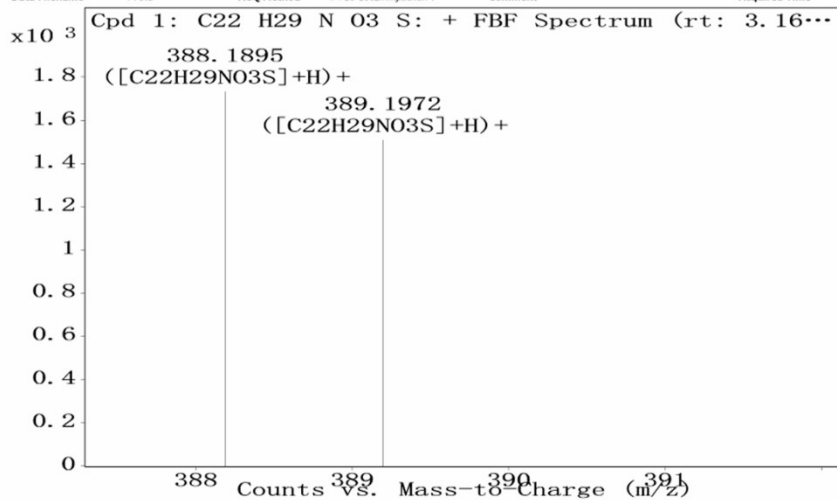

**cyclododecylmethyl 4-(2-methyl-1,4,3-oxathiazinan-2-yl)benzoate (3q).**

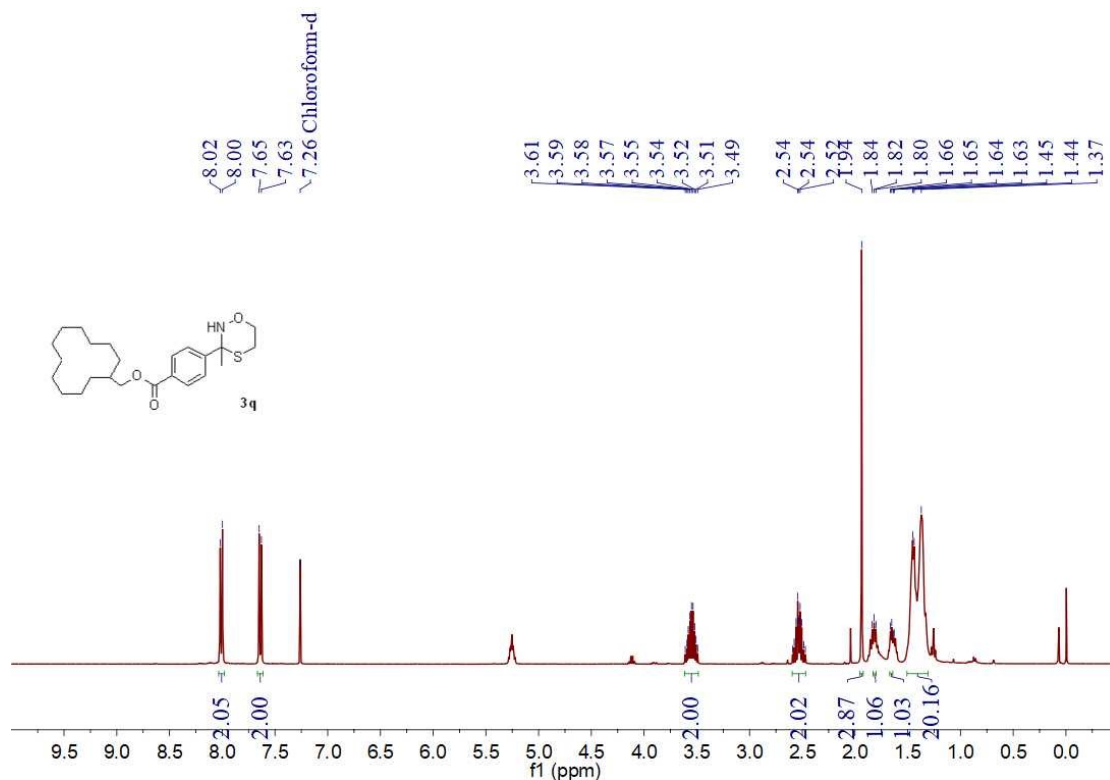

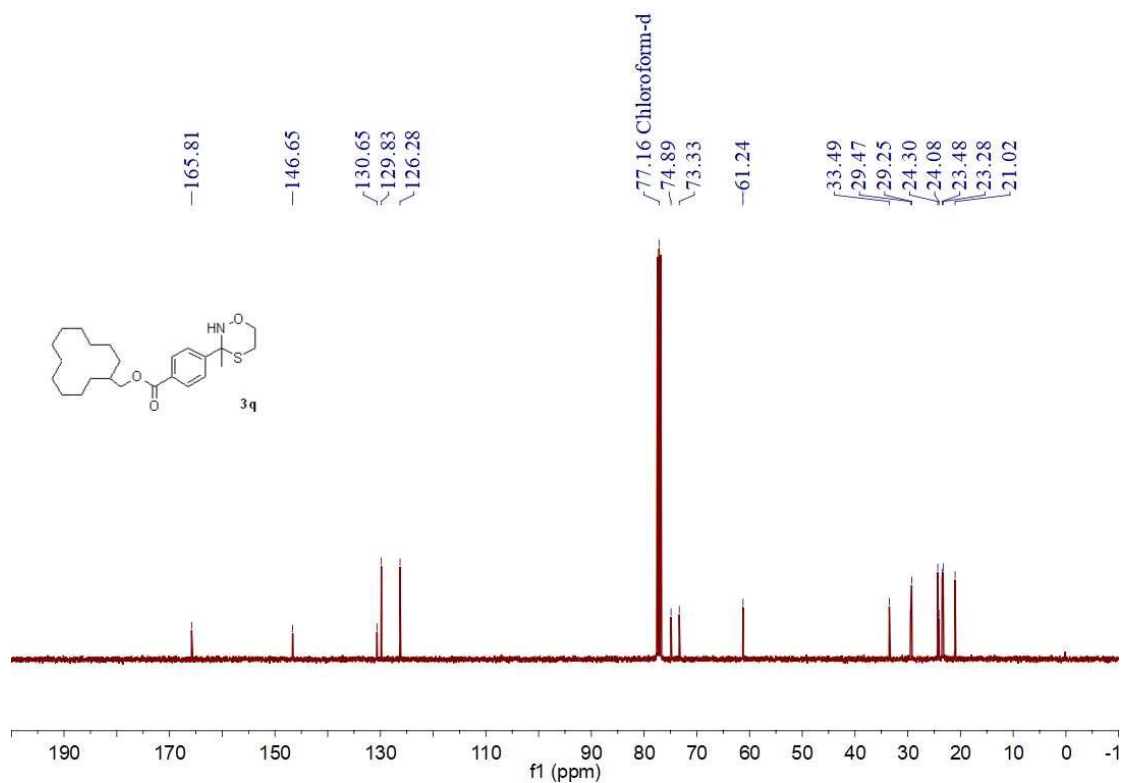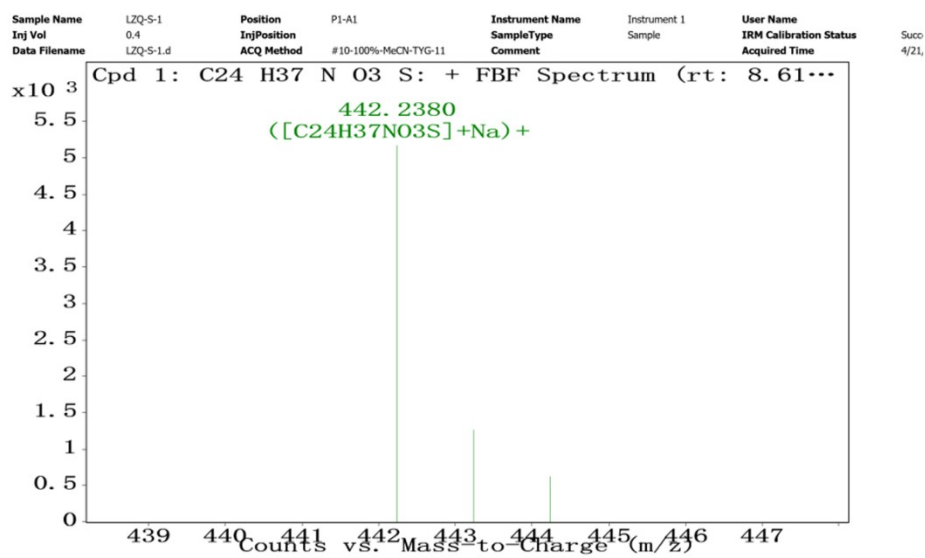

adamantan-1-yl 4-(2-methyl-1,4,3-oxathiazinan-2-yl)benzoate (3r).

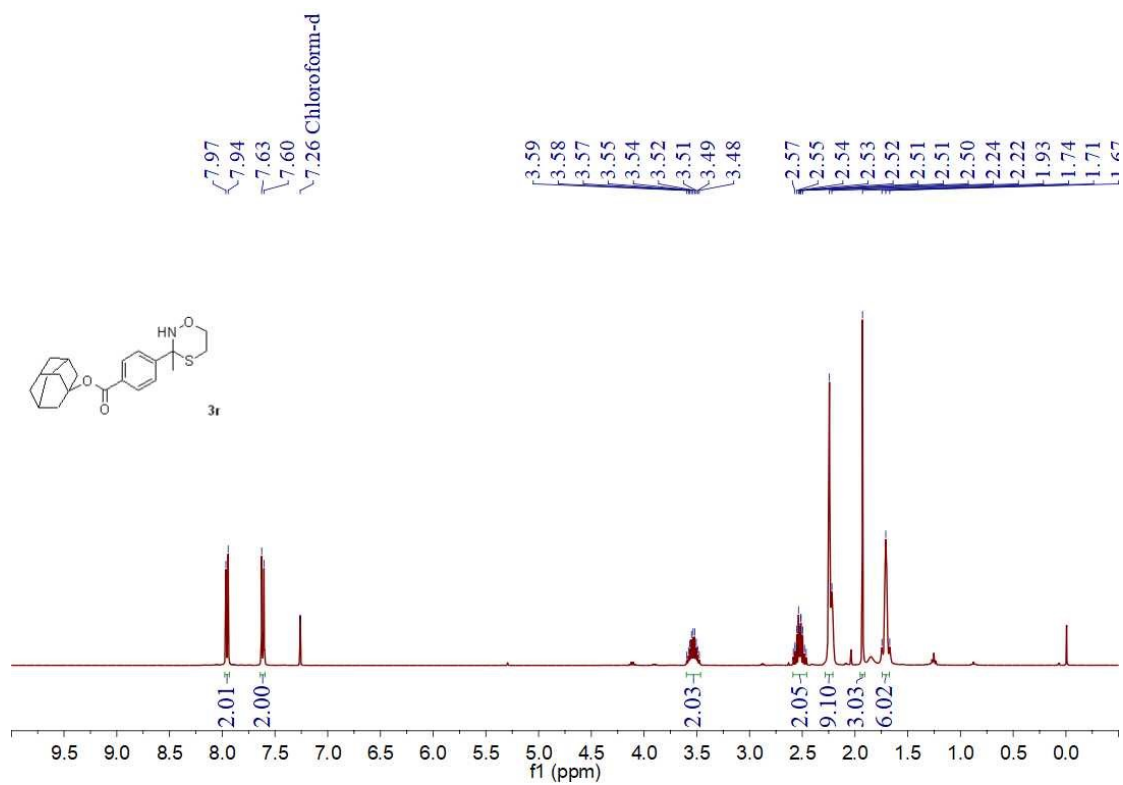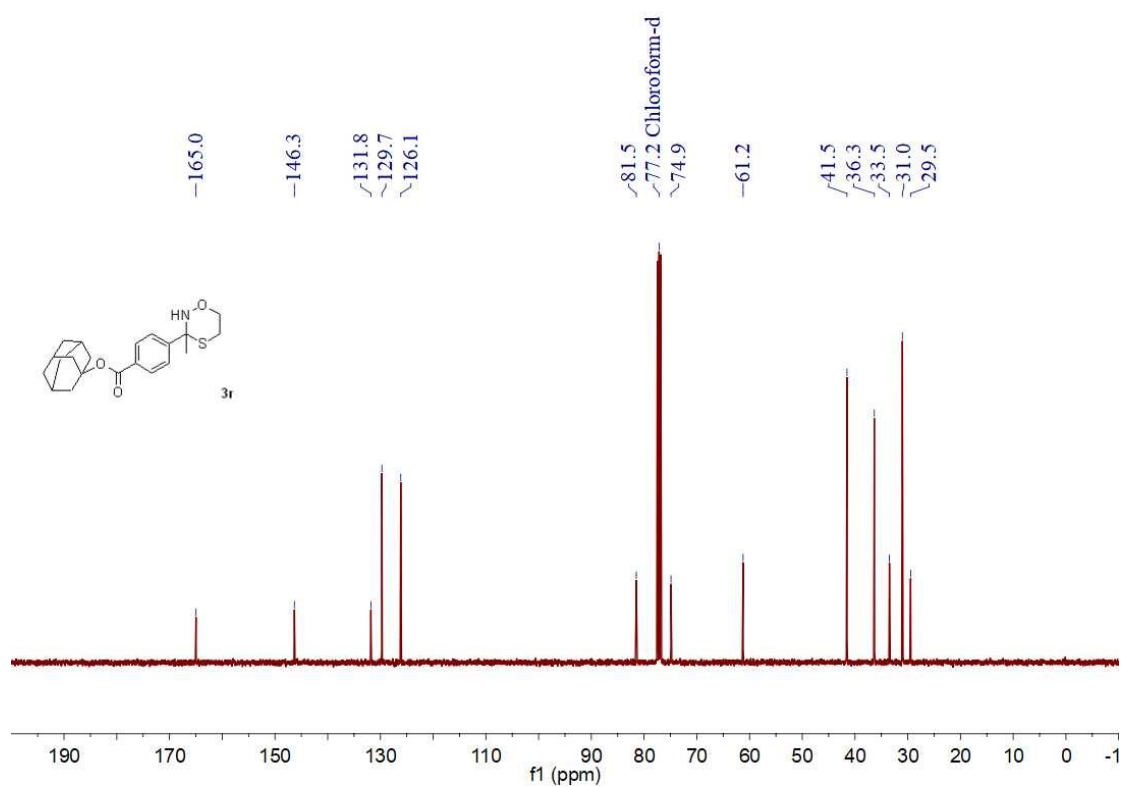

| Sample Name   | LZQ-S-3   | Position     | P1-A3                | Instrument Name | Instrument 1 | User Name              |       |
|---------------|-----------|--------------|----------------------|-----------------|--------------|------------------------|-------|
| Inj Vol       | 0.4       | Inj Position |                      | SampleType      | Sample       | IRM Calibration Status | Suco  |
| Data Filename | LZQ-S-3.d | ACQ Method   | #10-100%-MeCN-TYG-11 | Comment         |              | Acquired Time          | 4/21, |

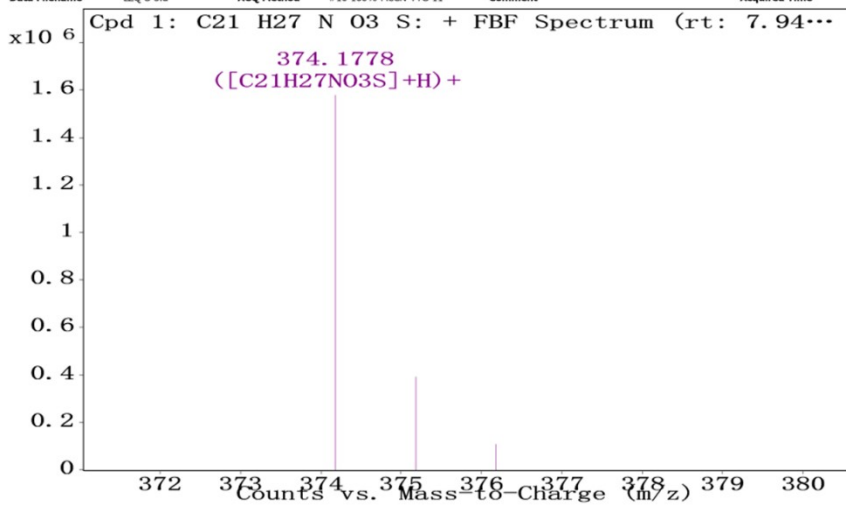

**2-isopropyl-5-methylcyclohexyl 4-(2-methyl-1,4,3-oxathiazinan-2-yl)benzoate (3s).**

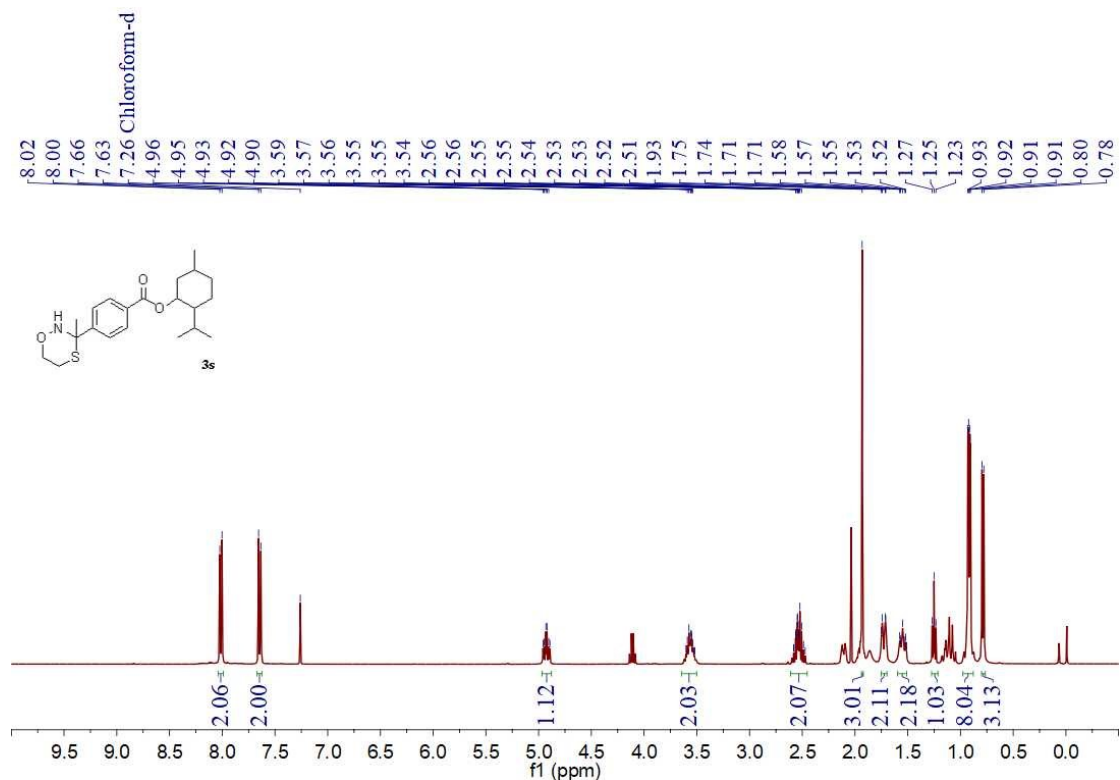

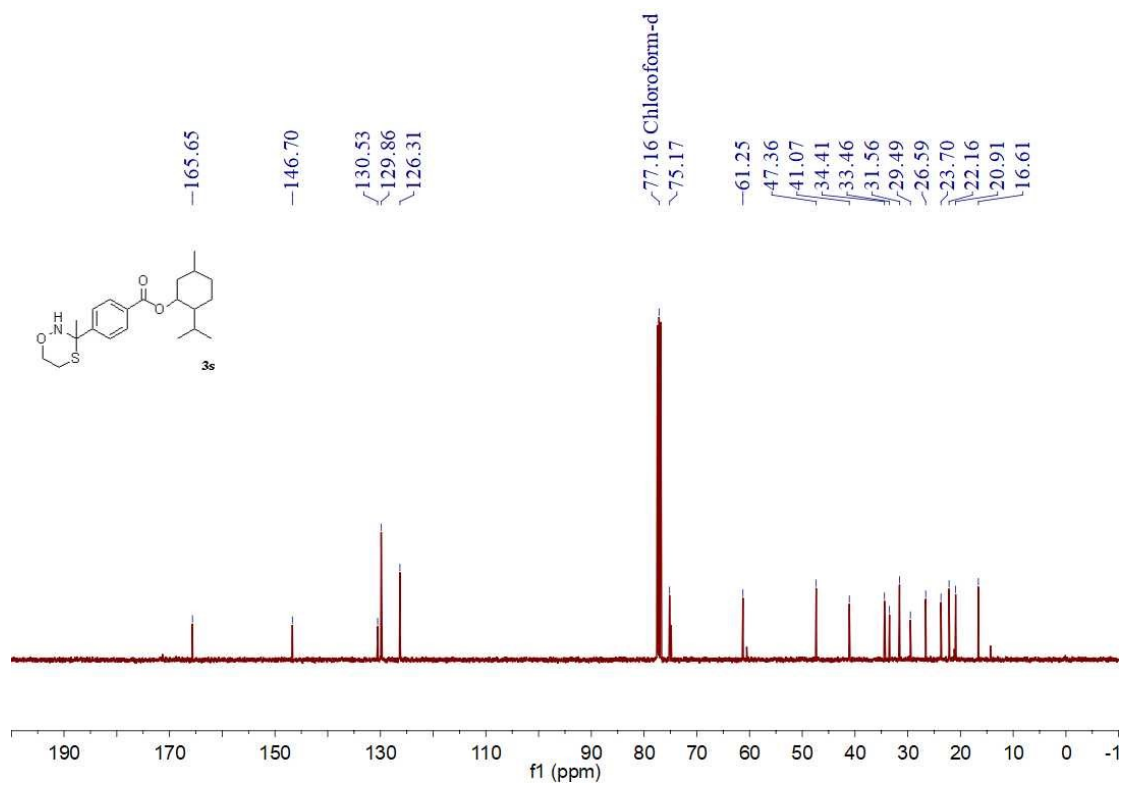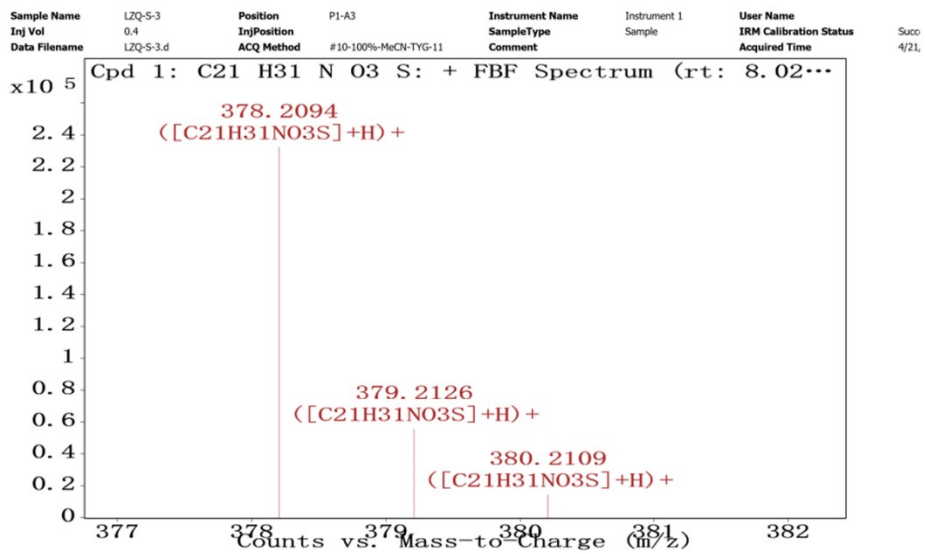

3,7-dimethyloct-6-en-1-yl 4-(2-methyl-1,4,3-oxathiazinan-2-yl)benzoate (**3t**).

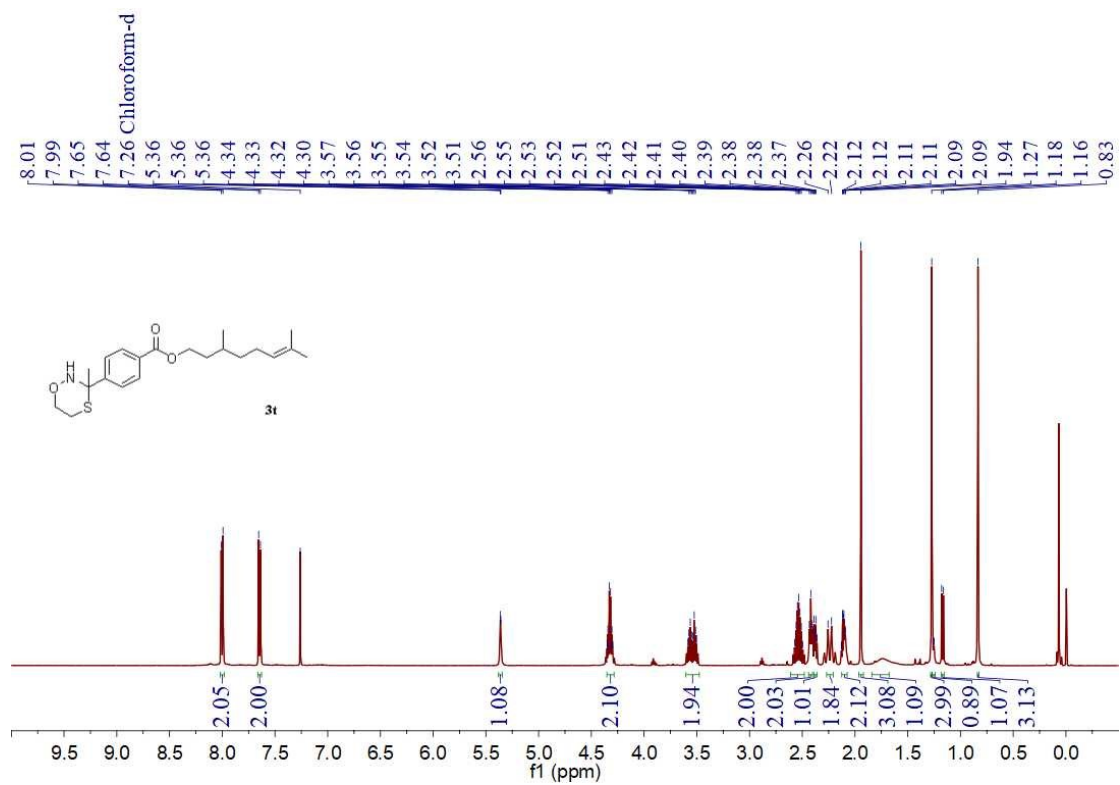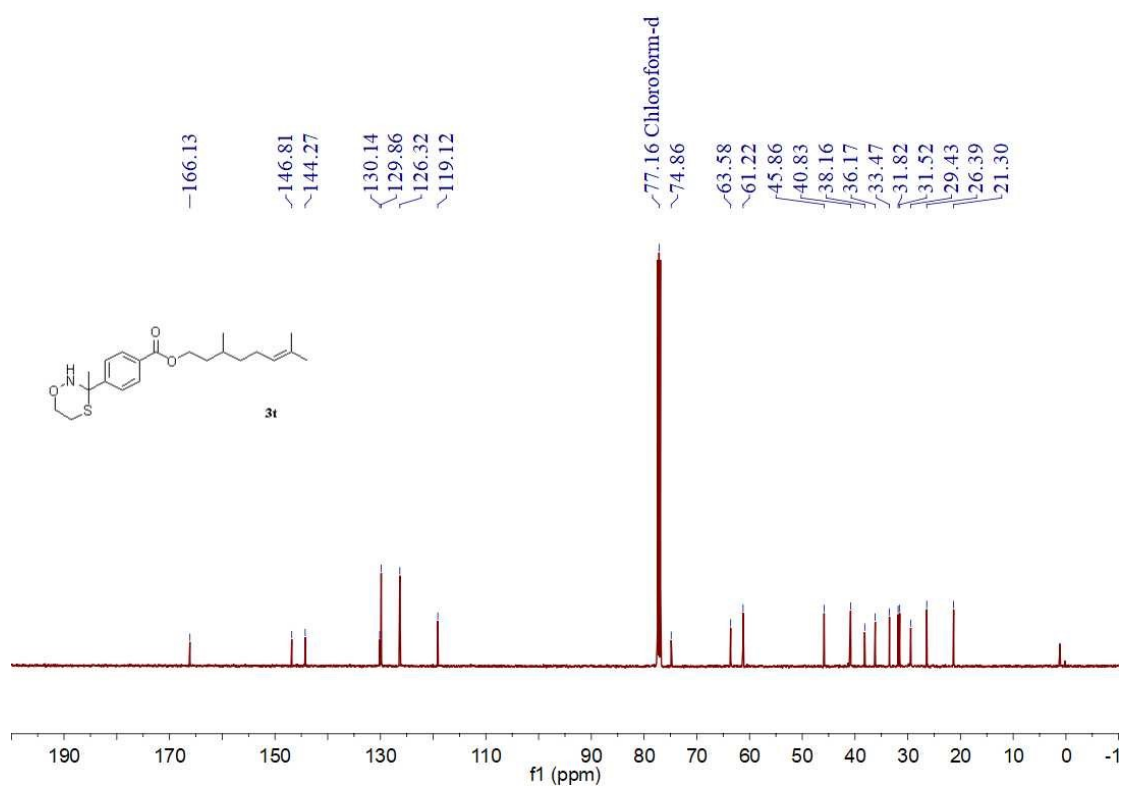

| Sample Name   | LZQ-S3    | Position    | PI-A3                | Instrument Name | Instrument 1 | User Name              |
|---------------|-----------|-------------|----------------------|-----------------|--------------|------------------------|
| Inj Vol       | 0.4       | InjPosition |                      | SampleType      | Sample       | IRM Calibration Status |
| Data Filename | LZQ-S-3.d | ACQ Method  | #10-100%-MeCN-TYG-11 | Comment         |              | Acquired Time          |

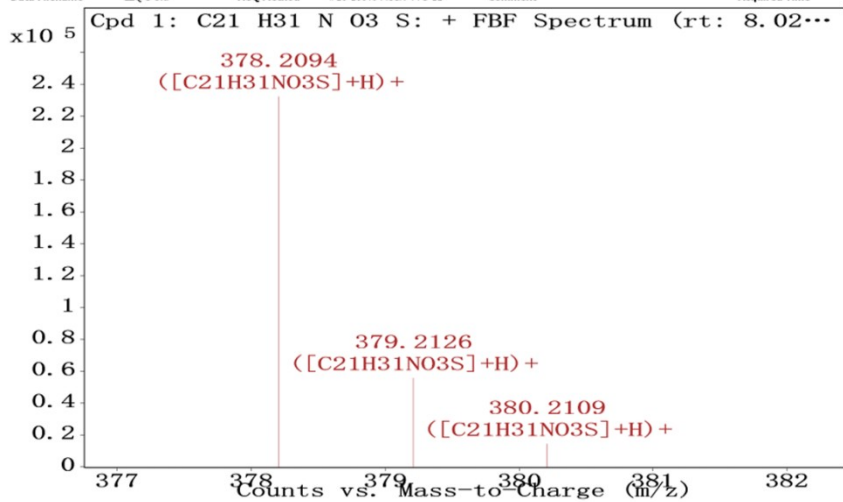

**benzo[d][1,3]dioxol-5-ylmethyl 4-(2-methyl-1,4,3-oxathiazinan-2-yl)benzoate (3u)**

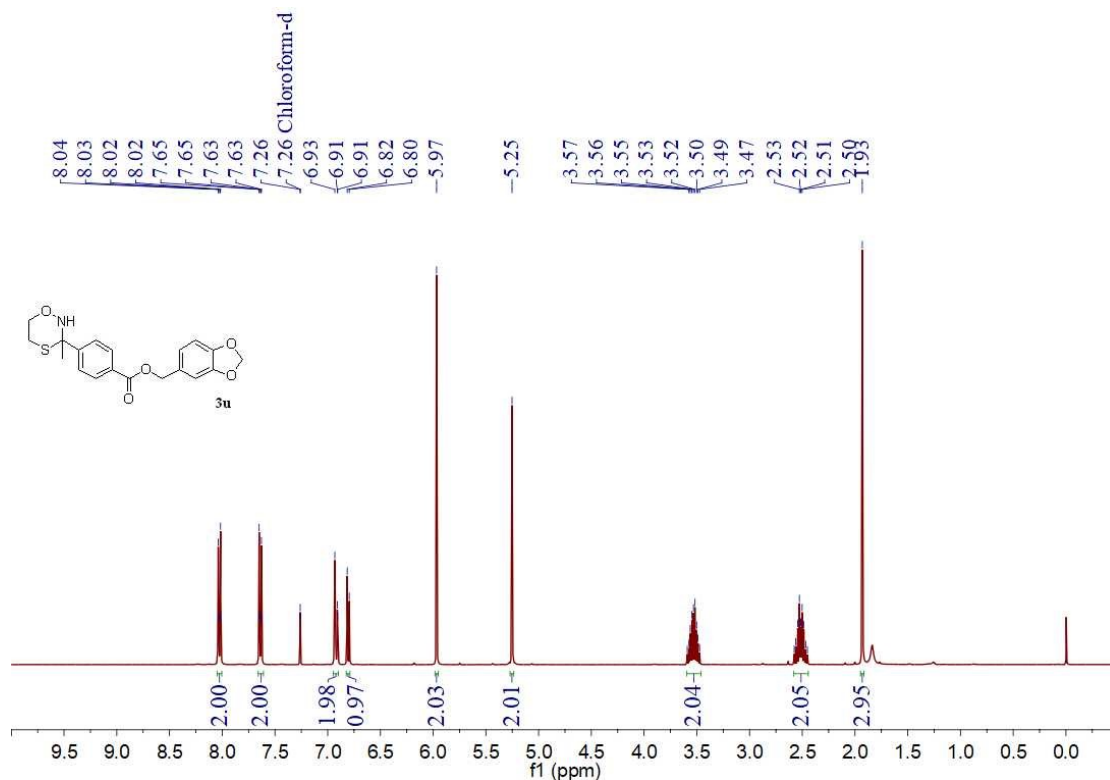

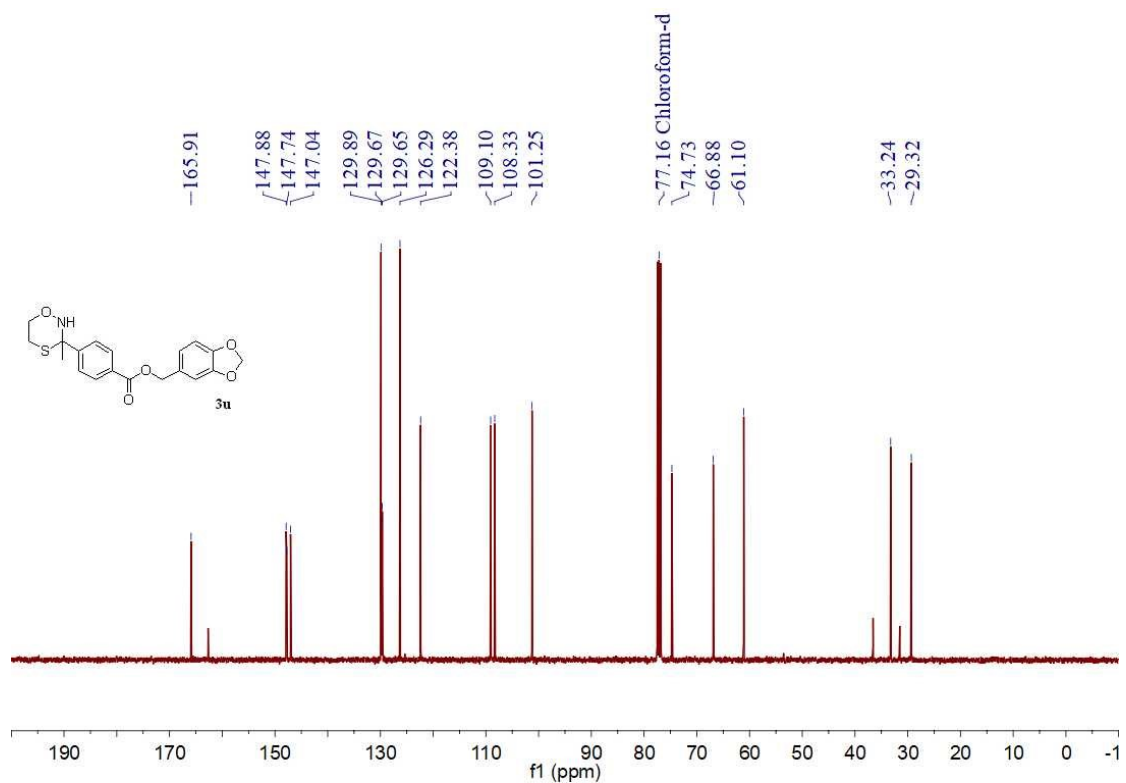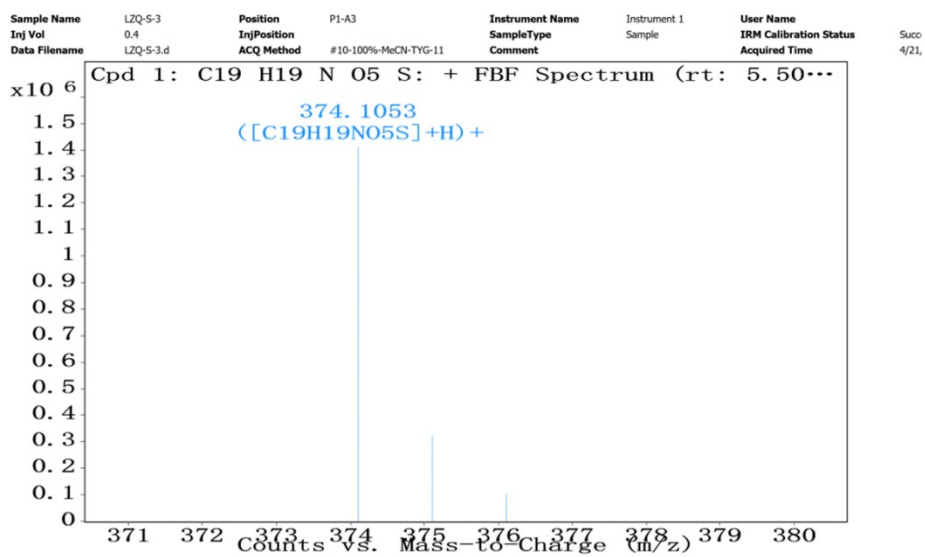

3-(4'-ethyl-[1,1'-biphenyl]-4-yl)-3-methyl-1,4,2-oxathiazinane (4h).



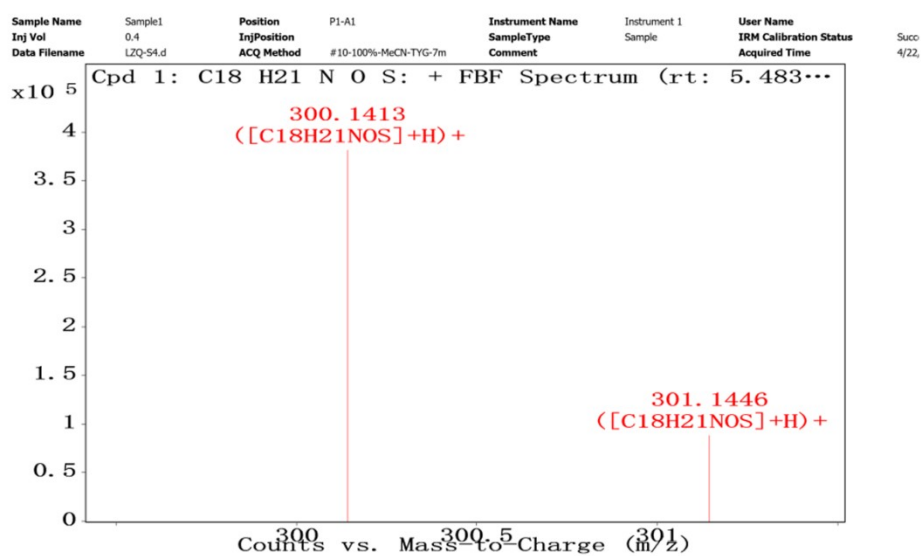

## 11. References

G. Li, K. Yu, J. Yang, B. Xu, Q. Chen, *J. Org. Chem.* **2021**, 86, 15946-15952.
